# Supplementary material
Source: publisher figshare collection journal article supplement (https://acs.figshare.com/ndownloader/files/3902815)
Supplement: Supplementary file 1 [file 3902815]

# A one-pot parallel reductive amination of aldehydes with heteroaromatic amines

*Andrey V. Bogolubsky,<sup>†</sup> Yurii S. Moroz,<sup>\*,†,‡</sup> Pavel K. Mykhailiuk,<sup>\*,†,§</sup> Dmitriy M. Panov,<sup>†</sup> Sergey*

*E. Pipko,<sup>‡</sup> Anzhelika I. Konovets,<sup>†,||</sup> and Andrey Tolmachev<sup>†,‡</sup>*

<sup>†</sup>Enamine Ltd., 23 Matrosova Street, Kyiv, 01103, Ukraine

<sup>‡</sup>ChemBioCenter, Kyiv National Taras Shevchenko University, 61 Chervonotkatska Street, Kyiv, 02094, Ukraine

<sup>§</sup>Department of Chemistry, Kyiv National Taras Shevchenko University, 64 Volodymyrska Street, Kyiv, 01601, Ukraine

<sup>||</sup>The Institute of High Technologies, Kyiv National Taras Shevchenko University, 4 Glushkov Street, Building 5, Kyiv, 03187, Ukraine

## Supporting Information.

|                                                 |    |
|-------------------------------------------------|----|
| Analytical data for the selected compounds..... | 2  |
| LC-MS spectra of the crude mixtures. ....       | 8  |
| NMR spectra for the selected compounds .....    | 48 |

## Analytical data for the selected compounds

### *N*-(4-fluorobenzyl)-5-methylisoxazol-3-amine (Entry 1, in Table 1)

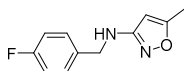

Yield: 143 mg, 69%; yellowish solid, mp 78-80°C. **IR** (KBr):  $\nu$  (cm<sup>-1</sup>) 3270, 3110, 3086, 3049, 2928, 2862, 1632, 1573, 1506, 1217, 1155; **<sup>1</sup>H NMR** (500 MHz, DMSO-d<sub>6</sub>):  $\delta$  (ppm) 2.20 (s, 3H, CH<sub>3</sub>), 4.20 (d, *J* = 6.1 Hz, 2H, CH<sub>2</sub>), 5.65 (d, *J* = 0.6 Hz, 1H, Het), 6.53 (t, *J* = 5.2 Hz, 1H, NH), 7.13 (t, *J* = 8.8 Hz, 2H, Ar), 7.35 (m, 2H, Ar); **<sup>13</sup>C NMR** (125 MHz, DMSO-d<sub>6</sub>):  $\delta$  (ppm) 12.1, 45.9, 93.7, 114.9 (d, *J* = 21 Hz), 129.4 (d, *J* = 8 Hz), 136.2 (d, *J* = 3 Hz), 161.0 (d, *J* = 245 Hz), 164.4, 167.6; **MS** (APCI) *m/z* [M+H]<sup>+</sup> calculated for C<sub>11</sub>H<sub>12</sub>FN<sub>2</sub>O: 207.1; found: 207.0; **Anal. Calcd.**: C, 64.07; H, 5.38; N, 13.58; found C, 63.80; H, 5.10; N, 13.70.

### *N*-(2-chlorobenzyl)-5-methylisoxazol-3-amine (Entry 2, in Table 1)

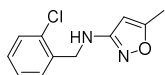

Yield: 51 mg, 23%; yellow solid, mp 105-107°C; **IR** (KBr):  $\nu$  (cm<sup>-1</sup>) 3255, 3187, 3072, 2929, 2871, 1627, 1560, 1520, 1356, 1050; **<sup>1</sup>H NMR** (500 MHz, DMSO-d<sub>6</sub>):  $\delta$  (ppm) 2.21 (s, 3H, CH<sub>3</sub>), 4.30 (d, *J* = 6.1 Hz, 2H, CH<sub>2</sub>), 5.69 (s, 1H, Het), 6.59 (t, *J* = 6.1 Hz, 1H, NH), 7.29 (m, 2H, Ar), 7.42 (m, 2H, Ar); **<sup>13</sup>C NMR** (125 MHz, DMSO-d<sub>6</sub>):  $\delta$  (ppm) 12.1, 44.3, 93.6, 127.1, 128.6, 129.0, 129.2, 132.3, 136.9, 164.2, 167.8; **MS** (APCI) *m/z* [M+H]<sup>+</sup> calculated for C<sub>11</sub>H<sub>12</sub>ClN<sub>2</sub>O: 223.1; found: 222.8; **Anal. Calcd.**: C, 59.33; H, 4.98; N, 12.58; found C, 59.10; H, 5.15; N, 12.45.

### *N*-(2,3-dimethoxybenzyl)benzo[*d*]oxazol-2-amine (Entry 3, in Table 1)

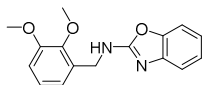

Yield: 241 mg, 84%; yellow solid, mp 79-81°C; **IR** (KBr):  $\nu$  (cm<sup>-1</sup>) 3170, 3053, 3000, 2961, 2905, 2832, 1680, 1586, 1480, 1457, 1266, 1243, 1063; **<sup>1</sup>H NMR** (500 MHz, DMSO-d<sub>6</sub>):  $\delta$  (ppm) 3.78 (s, 3H, CH<sub>3</sub>), 3.80 (s, 3H, CH<sub>3</sub>), 4.53 (d, *J* = 5.9 Hz, 2H, CH<sub>2</sub>), 6.92 – 6.99 (m, 3H, Ar), 7.02 (t, *J* = 7.9 Hz, 1H, Ar), 7.1 (t, *J* = 7.3 Hz, 1H, Ar), 7.23 (d, *J* = 7.7 Hz, 1H, Ar), 7.33 (d, *J* = 7.8 Hz, 1H, Ar), 8.34 (t, *J* = 5.5 Hz, 1H, NH); **<sup>13</sup>C NMR** (125 MHz, DMSO-d<sub>6</sub>):  $\delta$  (ppm) 40.7, 55.8, 60.2, 108.6, 112.0, 115.6, 120.0, 120.2, 123.7, 123.9, 132.3, 143.3, 146.4, 148.2, 152.4, 162.5; **MS** (APCI) *m/z* [M+H]<sup>+</sup> calculated for C<sub>16</sub>H<sub>17</sub>N<sub>2</sub>O<sub>3</sub>: 285.1; found: 285.0; **Anal. Calcd.**: C, 67.59; H, 5.67; N, 9.85; found C, 67.20; H, 5.90; N, 9.55.

### *N*-(3,4,5-trimethoxybenzyl)benzo[*d*]oxazol-2-amine (Entry 4, in Table 1)

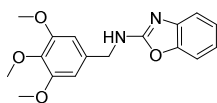

Yield: 100 mg, 32%; whitish solid, mp 112-114°C; **IR** (KBr):  $\nu$  (cm<sup>-1</sup>) 3335, 3250, 3178, 3063, 2954, 2937, 1677, 1648, 1586, 1457, 1415, 1247, 1128; **<sup>1</sup>H NMR** (500 MHz, DMSO-d<sub>6</sub>):  $\delta$  (ppm) 3.63 (s, 3H, CH<sub>3</sub>), 3.75 (s, 6H, 2CH<sub>3</sub>), 4.46 (d, J = 6.0 Hz, 2H, CH<sub>2</sub>), 6.72 (s, 2H, Ar), 6.98 (t, J = 7.7 Hz, 1H, Ar), 7.10 (t, J = 7.7 Hz, 1H, Ar), 7.24 (d, J = 7.7 Hz, 1H, Ar), 7.34 (d, J = 7.7 Hz, 1H, Ar), 7.41 (t, J = 5.7 Hz, 1H, NH); **<sup>13</sup>C NMR** (125 MHz, DMSO-d<sub>6</sub>):  $\delta$  (ppm) 46.1, 55.9, 60.1, 104.7, 108.7, 115.6, 120.3, 123.7, 134.7, 136.6, 143.2, 148.2, 152.9, 162.5; **MS** (APCI)  $m/z$  [M+H]<sup>+</sup> calculated for C<sub>17</sub>H<sub>19</sub>N<sub>2</sub>O<sub>4</sub>: 315.2; found: 315.0; **Anal. Calcd.**: C, 64.96; H, 5.77; N, 8.91; found C, 65.05; H, 5.90; N, 8.80.

**N-benzyl-3-methyl-1,2,4-oxadiazol-5-amine (Entry 5, in Table 1)**

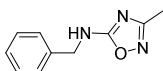

Yield: 113 mg, 60%; yellowish solid, mp 108-110°C; **IR** (KBr):  $\nu$  (cm<sup>-1</sup>) 3293, 3178, 3069, 2930, 2882, 1661, 1414, 1355, 1302, 1010; **<sup>1</sup>H NMR** (500 MHz, DMSO-d<sub>6</sub>):  $\delta$  (ppm) 2.08 (s, 3H, CH<sub>3</sub>), 4.44 (d, J = 6.0 Hz, 2H, CH<sub>2</sub>), 7.22 – 7.28 (m, 1H, Ar), 7.29 – 7.38 (m, 4H, Ar), 8.75 (t, J = 5.7 Hz, 1H, NH); **<sup>13</sup>C NMR** (125 MHz, DMSO-d<sub>6</sub>):  $\delta$  (ppm) 11.5, 46.4, 127.2, 127.3, 128.5, 138.7, 167.0, 171.4; **MS** (APCI)  $m/z$  [M+H]<sup>+</sup> calculated for C<sub>10</sub>H<sub>12</sub>N<sub>3</sub>O: 190.1; found: 190.0; **Anal. Calcd.**: C, 63.48; H, 5.86; N, 22.21; found C, 63.20; H, 6.05; N, 22.10.

**N-(4-fluorobenzyl)-3-methyl-1,2,4-oxadiazol-5-amine (Entry 6, in Table 1)**

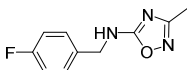

Yield: 89 mg, 43%; yellowish solid, mp 82-84°C; **IR** (KBr):  $\nu$  (cm<sup>-1</sup>) 3299, 3201, 3161, 3072, 2964, 2868, 1661, 1507, 1415, 1326, 1210, 1007; **<sup>1</sup>H NMR** (500 MHz, DMSO-d<sub>6</sub>):  $\delta$  (ppm) 2.08 (s, 3H, CH<sub>3</sub>), 4.40 (d, J = 6.0 Hz, 2H, CH<sub>2</sub>), 7.16 (t, J = 8.8 Hz, 2H, Ar), 7.35 (m, 2H, Ar), 8.70 (m, 1H, NH); **<sup>13</sup>C NMR** (125 MHz, DMSO-d<sub>6</sub>):  $\delta$  (ppm) 11.5, 45.7, 115.2 (d, J = 21 Hz), 129.3 (d, J = 8 Hz), 134.8 (d, J = 3 Hz), 161.0 (d, J = 244 Hz), 166.9, 171.3; **MS** (APCI)  $m/z$  [M+H]<sup>+</sup> calculated for C<sub>10</sub>H<sub>11</sub>FN<sub>3</sub>O: 208.1; found: 207.8; **Anal. Calcd.**: C, 57.97; H, 4.86; N, 20.28; found C, 57.80; H, 5.00; N, 20.44.

**N-(2,3-dimethoxybenzyl)-[1,2,4]triazolo[4,3-a]pyridin-3-amine (Entry 11, in Table 1)**

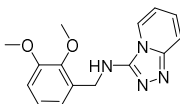

Yield: 57 mg, 20%; white solid, mp 182-184°C; **IR** (KBr):  $\nu$  (cm<sup>-1</sup>) 3431, 3181, 3053, 3003, 2954, 2924, 2832, 1635, 1598, 1592, 1486, 1230, 1088, 1003; **<sup>1</sup>H NMR** (500 MHz, DMSO-d<sub>6</sub>):  $\delta$  (ppm) 3.79 (s, 3H, OCH<sub>3</sub>), 3.81 (s, 3H, OCH<sub>3</sub>), 4.60 (d, J = 5.6 Hz, 2H, CH<sub>2</sub>), 6.73 (t, J = 6.5 Hz, 1H, NH), 7.02 (m, 5H, Ar), 7.43 (d, J = 9.3 Hz, 1H, Ar), 8.16 (d, J = 7.0 Hz, 1H, Ar); **<sup>13</sup>C NMR** (125 MHz, DMSO-d<sub>6</sub>):  $\delta$  (ppm) 41.3, 55.8, 60.2, 111.4, 111.9, 115.5, 120.5, 122.4, 123.8, 125.5, 132.9, 146.2, 146.6, 148.7, 152.4; **MS** (APCI)  $m/z$  [M+H]<sup>+</sup> calculated for C<sub>15</sub>H<sub>17</sub>N<sub>4</sub>O<sub>2</sub>: 285.1; found: 285.1; **Anal. Calcd.**: C, 63.37; H, 5.67; N, 19.71; found C, 63.44; H, 5.83; N, 19.83.

***N*-benzyl-5-methylthiazol-2-amine (Entry 13, in Table 1)**

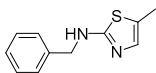

Yield: 161 mg, 79%; yellow solid, mp 98-100°C; **IR** (KBr):  $\nu$  (cm<sup>-1</sup>) 3165, 3063, 2967, 2915, 2855, 1569, 1536, 1510, 1467, 1283, 1145; **<sup>1</sup>H NMR** (500 MHz, DMSO-d<sub>6</sub>):  $\delta$  (ppm) 2.18 (s, 3H, CH<sub>3</sub>), 4.38 (d, *J* = 4.8 Hz, 2H, CH<sub>2</sub>), 6.65 (s, 1H, CH), 7.23 (m, 1H, Ar), 7.31 (m, 4H, Ar), 7.81 (m, 1H, NH); **<sup>13</sup>C NMR** (125 MHz, DMSO-d<sub>6</sub>):  $\delta$  (ppm) 11.7, 47.5, 119.5, 126.9, 127.4, 128.3, 135.5, 139.6, 167.6; **MS** (APCI) *m/z* [M+H]<sup>+</sup> calculated for C<sub>11</sub>H<sub>13</sub>N<sub>2</sub>S: 205.1; found: 205.0; **Anal. Calcd.**: C, 64.67; H, 5.92; N, 13.71; found C, 64.55; H, 6.06; N, 13.85.

***N*-((2,3-dihydrobenzo[*b*][1,4]dioxin-6-yl)methyl)-6-(methylsulfonyl)benzo[*d*]thiazol-2-amine (Entry 15, in Table 1)**

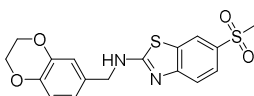

Yield: 177 mg, 47%; white solid, mp 282-284°C; **IR** (KBr):  $\nu$  (cm<sup>-1</sup>) 3217, 3194, 3082, 3030, 2941, 2895, 1612, 1572, 1510, 1303, 1280, 1141; **<sup>1</sup>H NMR** (500 MHz, DMSO-d<sub>6</sub>):  $\delta$  (ppm) 3.17 (s, 3H, CH<sub>3</sub>), 4.20 (s, 4H, 2CH<sub>2</sub>O), 4.50 (d, *J* = 4.6 Hz, 2H, CH<sub>2</sub>), 6.82 (s, 2H, Ar), 6.87 (s, 1H, Ar), 7.53 (d, *J* = 8.6 Hz, 1H, Ar), 7.72 (d, *J* = 8.6 Hz, 1H, Ar), 8.28 (s, 1H, Ar), 8.90 (m, 1H, NH); **<sup>13</sup>C NMR** (125 MHz, DMSO-d<sub>6</sub>):  $\delta$  (ppm) 44.3, 46.9, 64.1, 64.2, 116.3, 117.1, 117.8, 120.5, 120.9, 125.0, 131.1, 131.4, 132.6, 142.7, 143.3, 156.5, 169.6; **MS** (APCI) *m/z* [M+H]<sup>+</sup> calculated for C<sub>17</sub>H<sub>17</sub>N<sub>2</sub>O<sub>4</sub>S<sub>2</sub>: 377.1; found: 377.0; **Anal. Calcd.**: C, 54.24; H, 4.28; N, 7.44; found C, 54.10; H, 4.40; N, 7.60.

***N*-(2-chlorobenzyl)-1,3,4-thiadiazol-2-amine (Entry 17, in Table 1)**

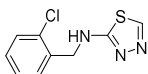

Yield: 153 mg, 68%; yellow solid, Mp 87-89°C; **IR** (KBr):  $\nu$  (cm<sup>-1</sup>) 3188, 3065, 2987, 2790, 1556, 1497, 1437, 1040; **<sup>1</sup>H NMR** (500 MHz, DMSO-d<sub>6</sub>):  $\delta$  (ppm) 4.61 (m, 2H, CH<sub>2</sub>), 7.30 (m, 2H, Ar), 7.44 (m, 2H, Ar), 8.32 (br. s, 1H, NH), 8.66 (s, 1H, Het); **<sup>13</sup>C NMR** (125 MHz, DMSO-d<sub>6</sub>):  $\delta$  (ppm) 46.1, 127.3, 129.0, 129.3, 129.4, 132.6, 135.8, 142.9, 168.2; **MS** (APCI) *m/z* [M+H]<sup>+</sup> calculated for C<sub>9</sub>H<sub>9</sub>ClN<sub>3</sub>S: 226.0; found: 225.8; **Anal. Calcd.**: C, 47.90; H, 3.57; N, 18.62; found C, 47.83; H, 3.65; N, 18.70.

***N*-((2,3-dihydrobenzo[*b*][1,4]dioxin-6-yl)methyl)-1,3,4-thiadiazol-2-amine (Entry 18, in Table 1)**

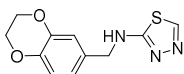

Yield: 114 mg, 46%; white solid, mp 117-119°C; **IR** (KBr):  $\nu$  (cm<sup>-1</sup>) 3204, 3086, 2997, 2947, 2924, 2882, 1590, 1566, 1506, 1441, 1319, 1283, 1260, 1072, 1050; **<sup>1</sup>H NMR** (500 MHz, DMSO-d<sub>6</sub>):  $\delta$  (ppm) 4.20 (s, 4H, 2CH<sub>2</sub>O), 4.35 (d, *J* = 5.6 Hz, 2H, CH<sub>2</sub>), 6.80 (s, 2H, Ar), 6.84 (s, 1H, Ar), 8.19 (t, *J* = 4.8 Hz, 1H, NH), 8.61 (s, 1H, Het); **<sup>13</sup>C NMR** (125 MHz, DMSO-d<sub>6</sub>):  $\delta$  (ppm) 47.9, 64.1, 64.2, 116.4, 116.9, 120.6, 131.7, 142.5, 142.6, 143.2, 168.5; **MS** (APCI) *m/z*

[M+H]<sup>+</sup> calculated for C<sub>11</sub>H<sub>12</sub>N<sub>3</sub>O<sub>2</sub>S: 250.1; found: 249.8; **Anal. Calcd.:** C, 53.00; H, 4.45; N, 16.86; found C, 52.85; H, 4.65; N, 16.74.

***N*-(2,3-dimethoxybenzyl)-3-methylpyridin-2-amine (Entry 19, in Table 1)**

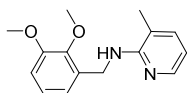

Yield: 83 mg, 32%; white solid, mp 84-86°C; **IR** (KBr):  $\nu$  (cm<sup>-1</sup>) 3417, 3008, 2963, 2936, 2899, 2836, 1598, 1507, 1480, 1275, 1060; **<sup>1</sup>H NMR** (500 MHz, DMSO-d<sub>6</sub>):  $\delta$  (ppm) 2.11 (s, 3H, CH<sub>3</sub>), 3.79 (s, 6H, 2OCH<sub>3</sub>), 4.60 (d, *J* = 5.8 Hz, 2H, CH<sub>2</sub>), 6.24 (t, *J* = 5.6 Hz, 1H, NH), 6.43 (m, 1H, Py), 6.81 (d, *J* = 7.4 Hz, 1H, Ar), 6.88 (d, *J* = 7.3 Hz, 1H, Ar), 6.94 (t, *J* = 7.9 Hz, 1H, Ar), 7.22 (d, *J* = 6.4 Hz, Py), 7.80 (d, *J* = 3.8 Hz, 1H, Py); **<sup>13</sup>C NMR** (125 MHz, DMSO-d<sub>6</sub>):  $\delta$  (ppm) 17.0, 38.9, 55.7, 59.9, 111.1, 111.8, 116.6, 119.7, 123.6, 134.6, 136.4, 144.9, 146.3, 152.2, 156.8; **MS** (APCI) *m/z* [M+H]<sup>+</sup> calculated for C<sub>15</sub>H<sub>19</sub>N<sub>2</sub>O<sub>2</sub>: 259.1; found: 259.0; **Anal. Calcd.:** C, 69.74; H, 7.02; N, 10.84; found C, 69.53; H, 7.13; N, 10.67.

**4-((dimethylamino)methyl)-*N*-(3,4,5-trimethoxybenzyl)pyridin-2-amine (Entry 21, in Table 1)**

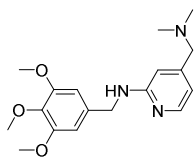

Yield: 315 mg, 95%; yellowish solid, mp 102-104°C; **IR** (KBr):  $\nu$  (cm<sup>-1</sup>) 3411, 3217, 3076, 2997, 2963, 2944, 2855, 2813, 2776, 1599, 1576, 1503, 1454, 1250, 1158; **<sup>1</sup>H NMR** (500 MHz, DMSO-d<sub>6</sub>):  $\delta$  (ppm) 2.11 (s, 6H, 2NCH<sub>3</sub>), 3.63 (s, 3H, CH<sub>3</sub>), 3.073 (s, 6H, 2CH<sub>3</sub>), 4.42 (d, *J* = 5.5 Hz, 2H, CH<sub>2</sub>), 6.43 (d, *J* = 5.0 Hz, 1H, Py), 6.50 (s, 1H, Py), 6.67 (s, 2H, Ar), 6.90 (t, *J* = 4.8 Hz, 1H, NH), 7.90 (d, *J* = 5.2 Hz, 1H, Py); **<sup>13</sup>C NMR** (125 MHz, DMSO-d<sub>6</sub>):  $\delta$  (ppm) 44.7, 45.1, 55.8, 60.0, 62.7, 104.6, 107.7, 112.4, 136.2, 136.4, 147.4, 148.4, 152.8, 159.1; **MS** (APCI) *m/z* [M+H]<sup>+</sup> calculated for C<sub>18</sub>H<sub>26</sub>N<sub>3</sub>O<sub>3</sub>: 332.2; found: 332.0; **Anal. Calcd.:** C, 65.23; H, 7.60; N, 12.68; found C, 65.11; H, 7.75; N, 12.60.

***N*-benzyl-4-(4-methyl-4*H*-1,2,4-triazol-3-yl)pyridin-2-amine (Entry 23, in Table 1)**

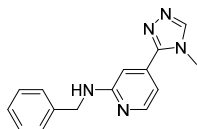

Yield: 111 mg, 42%; yellowish solid, mp 146-148°C; **IR** (KBr):  $\nu$  (cm<sup>-1</sup>) 3273, 3181, 3131, 3105, 3065, 3036, 2977, 2918, 1615, 1549, 1497, 1194; **<sup>1</sup>H NMR** (500 MHz, DMSO-d<sub>6</sub>):  $\delta$  (ppm) 3.72 (s, 3H, NCH<sub>3</sub>), 4.53 (d, *J* = 5.8 Hz, 2H, CH<sub>2</sub>), 6.84 (d, *J* = 5.2 Hz, 1H, Py), 6.88 (s, 1H, Py), 7.22 (t, *J* = 7.1 Hz, 1H, Ar), 7.31 (m, 2H, Ar), 7.35 (m, 3H, NH + Ar), 8.11 (d, *J* = 5.2 Hz, 1H, Py), 8.58 (s, 1H, Het); **<sup>13</sup>C NMR** (125 MHz, DMSO-d<sub>6</sub>):  $\delta$  (ppm) 32.2, 44.3, 106.9, 110.3, 126.7, 127.3, 128.3, 135.0, 140.4, 146.7, 148.5, 151.9, 159.1; **MS** (APCI) *m/z* [M+H]<sup>+</sup> calculated for C<sub>15</sub>H<sub>16</sub>N<sub>5</sub>: 266.1; found: 266.1; **Anal. Calcd.:** C, 67.90; H, 5.70; N, 26.40; found C, 67.75; H, 5.85; N, 26.30.

***N*-(2-chlorobenzyl)-4-(4-methyl-4*H*-1,2,4-triazol-3-yl)pyridin-2-amine (Entry 24, in Table 1)**

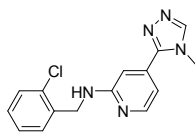

Yield: 75 mg, 25%; yellowish solid, mp 186-188°C; **IR** (KBr):  $\nu$  (cm<sup>-1</sup>) 3293, 3250, 3095, 3046, 2941, 2915, 1618, 1553, 1500, 1286, 1197, 1040; **<sup>1</sup>H NMR** (500 MHz, DMSO-*d*<sub>6</sub>):  $\delta$  (ppm) 3.75 (s, 3H, NCH<sub>3</sub>), 4.60 (d, *J* = 5.8 Hz, 2H, CH<sub>2</sub>), 6.87 (d, *J* = 5.2 Hz, 1H, Py), 6.96 (s, 1H, Py), 7.28 (m, 2H, Ar), 7.39 (m, 2H, Ar), 7.44 (d, *J* = 7.7 Hz, 1H, Py), 8.09 (d, *J* = 5.2 Hz, 1H, NH), 8.59 (s, 1H, Het); **<sup>13</sup>C NMR** (125 MHz, DMSO-*d*<sub>6</sub>):  $\delta$  (ppm) 32.3, 42.1, 107.2, 110.6, 127.2, 128.5, 128.8, 129.2, 132.3, 135.1, 137.4, 146.8, 148.4, 151.8, 158.8; **MS** (APCI) *m/z* [M+H]<sup>+</sup> calculated for C<sub>15</sub>H<sub>15</sub>ClN<sub>5</sub>: 300.1; found: 300.0; **Anal. Calcd.**: C, 60.10; H, 4.71; N, 23.36; found C, 60.05; H, 4.85; N, 23.23.

**(3-chloro-6-(4-fluorobenzylamino)pyridin-2-yl)methanol (Entry 27, in Table 1)**

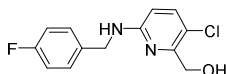

Yield: 198 mg, 74%; yellow solid, mp 58-60°C; **IR** (KBr):  $\nu$  (cm<sup>-1</sup>) 3332, 3046, 2918, 2866, 1595, 1507, 1408, 1220, 1076; **<sup>1</sup>H NMR** (500 MHz, DMSO-*d*<sub>6</sub>):  $\delta$  (ppm) 4.43 (s, 2H, CH<sub>2</sub>), 4.48 (d, *J* = 5.6, 2H, CH<sub>2</sub>), 4.77 (br. s, 1H, OH), 6.44 (d, *J* = 8.6 Hz, 1H, Ar), 7.12 (t, *J* = 8.8 Hz, 2H, Ar), 7.30 (t, *J* = 5.3 Hz, 1H, NH), 7.38 (m, 3H, Ar); **<sup>13</sup>C NMR** (125 MHz, DMSO-*d*<sub>6</sub>):  $\delta$  (ppm) 43.7, 61.7, 108.3, 115.0 (d, *J* = 20 Hz), 115.2, 129.3 (d, *J* = 9 Hz), 136.5 (d, *J* = 2.5 Hz), 137.9, 138.1, 153.4, 156.6, 161.2 (d, *J* = 243 Hz); **MS** (APCI) *m/z* [M+H]<sup>+</sup> calculated for C<sub>13</sub>H<sub>13</sub>ClFN<sub>2</sub>O: 267.1; found: 267.2; **Anal. Calcd.**: C, 58.55; H, 4.54; N, 10.50; found C, 58.45; H, 4.66; N, 10.34.

***N*-(3,4,5-trimethoxybenzyl)pyridin-3-amine (Entry 30, in Table 1)**

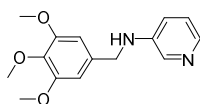

Yield: 230 mg, 84%; brownish solid, mp 91-93°C; **IR** (KBr):  $\nu$  (cm<sup>-1</sup>) 3257, 3112, 3056, 3000, 2931, 2832, 2826, 1595, 1540, 1507, 1467, 1418, 1422, 1337, 1233, 1130, 1010; **<sup>1</sup>H NMR** (500 MHz, DMSO-*d*<sub>6</sub>):  $\delta$  (ppm) 3.65 (s, 3H, CH<sub>3</sub>), 3.74 (s, 6H, 2CH<sub>3</sub>), 4.23 (d, *J* = 5.5 Hz, 2H, CH<sub>2</sub>), 6.46 (t, *J* = 5.2 Hz, 1H, NH), 6.72 (s, 2H, Ar), 6.93 (m, 1H, Py), 7.04 (m, 1H, Py), 7.78 (s, 1H, Py), 8.06 (s, 1H, Py); **<sup>13</sup>C NMR** (125 MHz, DMSO-*d*<sub>6</sub>):  $\delta$  (ppm) 46.6, 55.8, 60.0, 104.6, 117.9, 123.6, 135.4, 135.7, 136.4, 137.2, 144.8, 153.0; **MS** (APCI) *m/z* [M+H]<sup>+</sup> calculated for C<sub>15</sub>H<sub>19</sub>N<sub>2</sub>O<sub>3</sub>: 275.1; found: 275.0; **Anal. Calcd.**: C, 65.68; H, 6.61; N, 10.21; found C, 65.55; H, 6.75; N, 10.14.

***N*-((2,3-dihydrobenzo[*b*][1,4]dioxin-6-yl)methyl)-2-methylpyridin-3-amine (Entry 31, in Table 1)**

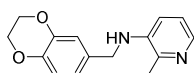

Yield: 92 mg, 36%; yellowish solid, mp 103-105°C; **IR** (KBr):  $\nu$  (cm<sup>-1</sup>) 3434, 3030, 2993, 2938, 2871, 1579, 1506, 1467, 1302, 1277, 1060; **<sup>1</sup>H NMR** (500 MHz, DMSO-d<sub>6</sub>):  $\delta$  (ppm) 2.35 (s, 3H, CH<sub>3</sub>), 4.18 (s, 4H, 2CH<sub>2</sub>), 4.22 (d, *J* = 5.9 Hz, 2H, CH<sub>2</sub>), 5.85 (d, *J* = 5.7 Hz, 1H, NH), 6.64 (d, *J* = 8.1 Hz, 1H, Py), 6.80 (m, 3H, Ar), 6.88 (m, 1H, Py), 7.63 (d, *J* = 4.6 Hz, 1H, Py); **<sup>13</sup>C NMR** (125 MHz, DMSO-d<sub>6</sub>):  $\delta$  (ppm) 21.0, 45.3, 64.0, 64.1, 115.3, 115.6, 116.9, 119.8, 121.7, 132.8, 135.6, 142.0, 142.2, 143.3, 143.7; **MS** (APCI) *m/z* [M+H]<sup>+</sup> calculated for C<sub>15</sub>H<sub>17</sub>N<sub>2</sub>O<sub>2</sub>: 257.1; found: 257.0; **Anal. Calcd.**: C, 70.29; H, 6.29; N, 10.93; found C, 70.12; H, 6.45; N, 10.86.

**Methyl 5-(benzylamino)nicotinate (Entry 33, in Table 1)**

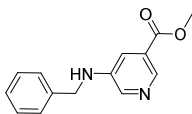

Yield: 177 mg, 73%; whitish solid, mp 128-130°C; **IR** (KBr):  $\nu$  (cm<sup>-1</sup>) 3253, 3049, 3007, 2951, 2860, 1717, 1597, 1418, 1315, 1224, 1099; **<sup>1</sup>H NMR** (500 MHz, DMSO-d<sub>6</sub>):  $\delta$  (ppm) 3.80 (s, 3H, CH<sub>3</sub>), 4.35 (d, *J* = 5.2 Hz, 2H, CH<sub>2</sub>), 6.89 (t, *J* = 5.2 Hz, 1H, NH), 7.23 (t, *J* = 7.1 Hz, 1H, Ar), 7.26 – 7.40 (m, 5H, 4Ar + 1Py), 8.22 (s, 1H, Py), 8.30 (s, 1H, Py); **<sup>13</sup>C NMR** (125 MHz, DMSO-d<sub>6</sub>):  $\delta$  (ppm) 46.0, 52.2, 117.6, 125.6, 127.0, 127.3, 128.5, 137.3, 139.1, 139.3, 144.6, 165.9; **MS** (APCI) *m/z* [M+H]<sup>+</sup> calculated for C<sub>14</sub>H<sub>15</sub>N<sub>2</sub>O<sub>2</sub>: 242.1; found: 243.0; **Anal. Calcd.**: C, 69.41; H, 5.82; N, 11.56; found C, 69.33; H, 5.96; N, 11.50.

**N-(2,3-dimethoxybenzyl)-6-(methylsulfonyl)pyridin-3-amine (Entry 35, in Table 1)**

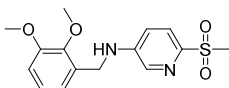

Yield: 161 mg, 50%; white solid, mp 142-144°C; **IR** (KBr):  $\nu$  (cm<sup>-1</sup>) 3243, 3078, 3003, 2934, 2835, 1579, 1477, 1302, 1161, 1125; **<sup>1</sup>H NMR** (500 MHz, DMSO-d<sub>6</sub>):  $\delta$  (ppm) 3.09 (s, 3H, SO<sub>2</sub>CH<sub>3</sub>), 3.78 (s, 3H, OCH<sub>3</sub>), 3.80 (s, 3H, OCH<sub>3</sub>), 4.36 (d, *J* = 5.6 Hz, 2H, CH<sub>2</sub>), 6.86 (d, *J* = 6.9 Hz, 1H, Py), 7.01 (m, 3H, Ar), 7.35 (t, *J* = 5.4, 1H, NH), 7.69 (d, *J* = 8.6 Hz, Py), 8.09 (d, *J* = 2.2 Hz, 1H, Py); **<sup>13</sup>C NMR** (125 MHz, DMSO-d<sub>6</sub>):  $\delta$  (ppm) 40.7, 40.9, 55.8, 60.4, 112.2, 116.5, 120.2, 122.6, 124.1, 131.5, 135.2, 143.6, 146.7, 147.6, 152.5; **MS** (APCI) *m/z* [M+H]<sup>+</sup> calculated for C<sub>15</sub>H<sub>19</sub>N<sub>2</sub>O<sub>4</sub>S: 323.1; found: 323.1; **Anal. Calcd.**: C, 55.89; H, 5.63; N, 8.69; found C, 55.80; H, 5.70; N, 8.59.

**N-(4-fluorobenzyl)-1,3-dimethyl-1H-pyrazolo[3,4-b]pyridin-5-amine (Entry 40, in Table 1)**

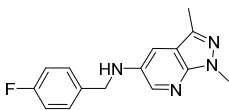

Yield: 59 mg, 22%; white solid, mp 96-98°C; **IR** (KBr):  $\nu$  (cm<sup>-1</sup>) 3290, 3046, 2928, 2839, 1602, 1507, 1477, 1224, 1151; **<sup>1</sup>H NMR** (500 MHz, DMSO-d<sub>6</sub>):  $\delta$  (ppm) 2.64 (s, 3H, CH<sub>3</sub>), 3.86 (3H, NCH<sub>3</sub>), 4.29 (d, *J* = 5.9 Hz, 2H, CH<sub>2</sub>), 6.25 (t, *J* = 5.8 Hz, 1H, NH), 7.04 (d, *J* = 2.2 Hz, 1H, Het), 7.15 (t, *J* = 8.9 Hz, 2H, Ar), 7.44 (m, 2H, Ar), 8.16 (d, *J* = 2.4 Hz, 1H, Het); **<sup>13</sup>C NMR** (125 MHz, DMSO-d<sub>6</sub>):  $\delta$  (ppm) 12.1, 33.2, 46.5, 106.3, 114.4, 115.1 (d, *J* = 21 Hz), 129.4 (d, *J* = 7.5 Hz), 135.9 (d, *J* = 3.8 Hz), 137.2, 139.7, 140.3, 144.3, 145.8, 161.3 (d, *J* = 239 Hz); **MS** (APCI) *m/z* [M+H]<sup>+</sup> calculated for C<sub>15</sub>H<sub>16</sub>FN<sub>4</sub>: 271.1; found: 271.0; **Anal. Calcd.**: C, 66.65; H, 5.59; N, 20.73; found C, 66.60; H, 5.73; N, 20.55.

## LC-MS spectra of the crude mixtures.

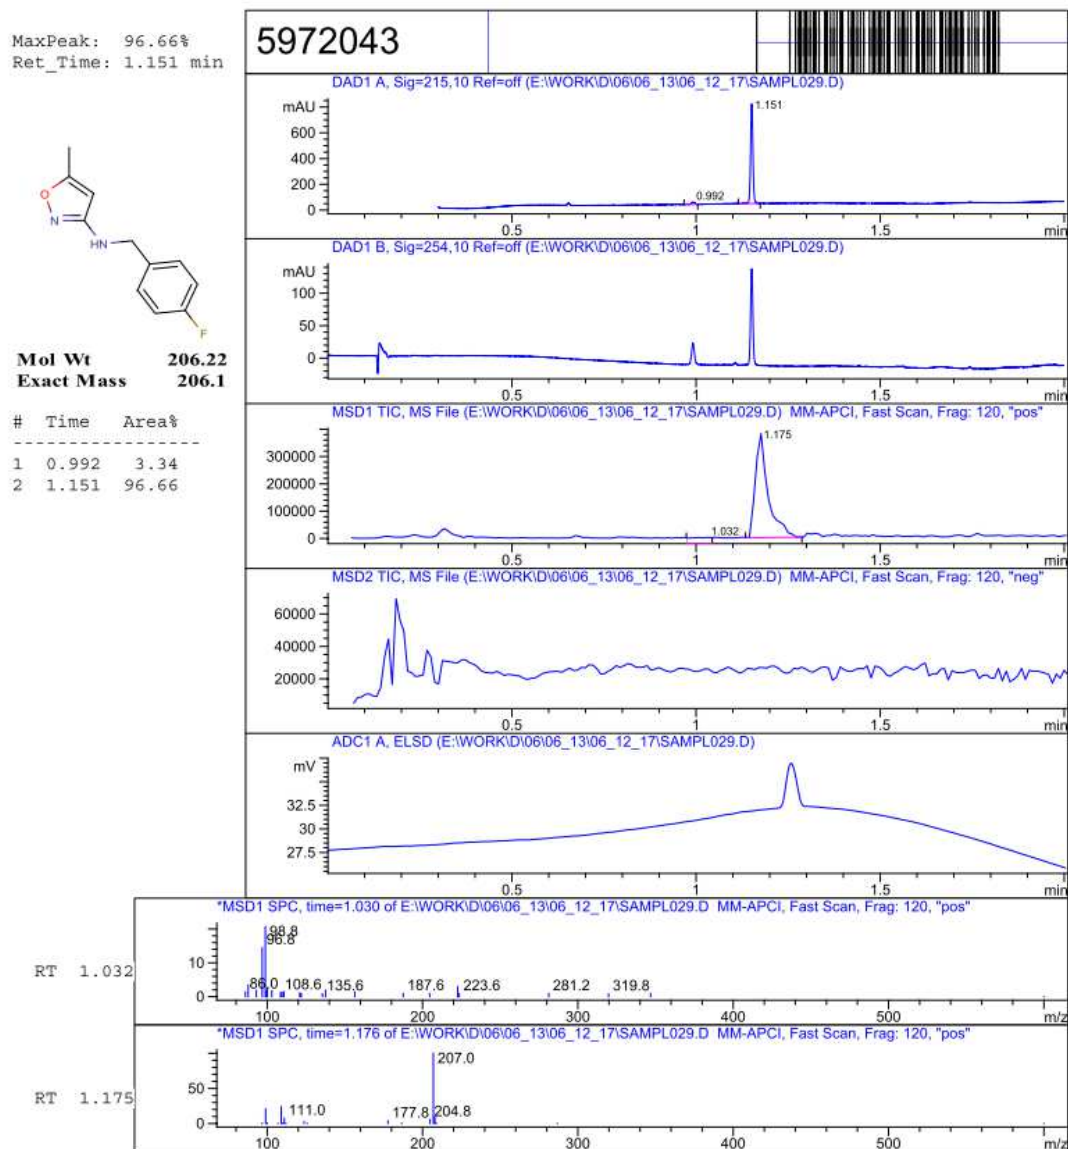

**Figure S1.** Entry 1, in Table 1: peak was assigned to the product (rt 1.15 min).



MaxPeak: 48.60%  
Ret\_Time: 1.232 min

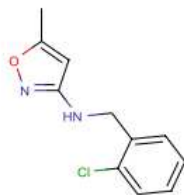

Mol Wt 222.67  
Exact Mass 222.07

| # | Time  | Area% |
|---|-------|-------|
| 1 | 0.296 | 11.94 |
| 2 | 0.611 | 2.69  |
| 3 | 0.985 | 4.74  |
| 4 | 1.024 | 1.17  |
| 5 | 1.159 | 25.85 |
| 6 | 1.232 | 48.60 |
| 7 | 1.373 | 1.67  |
| 8 | 1.473 | 1.50  |
| 9 | 1.684 | 1.84  |

5972046

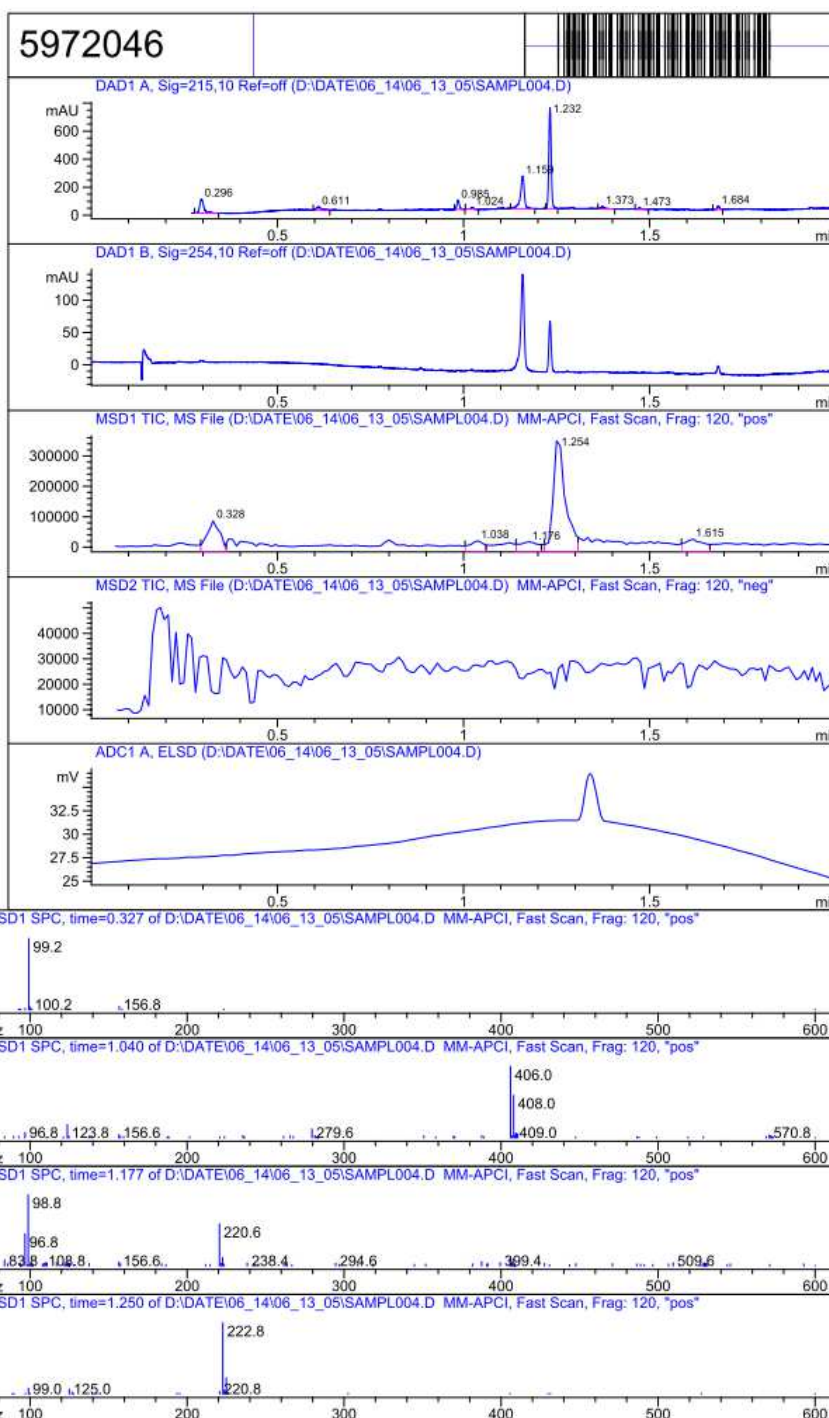

**Figure S2.** Entry 2, in Table 1: peaks were assigned to the starting amine (rt 0.3 min), the aldehyde (rt 0.99 min), the tertiary amine (rt 1.02 min), the intermediate imine (rt 1.16 min), and the product (rt 1.23 min).

MaxPeak: 91.66%  
Ret\_Time: 1.294 min

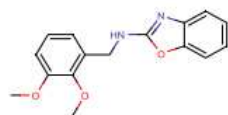

Mol Wt 284.31  
Exact Mass 284.13

| # | Time  | Area% |
|---|-------|-------|
| 1 | 0.643 | 1.92  |
| 2 | 0.743 | 1.43  |
| 3 | 1.120 | 5.00  |
| 4 | 1.294 | 91.66 |

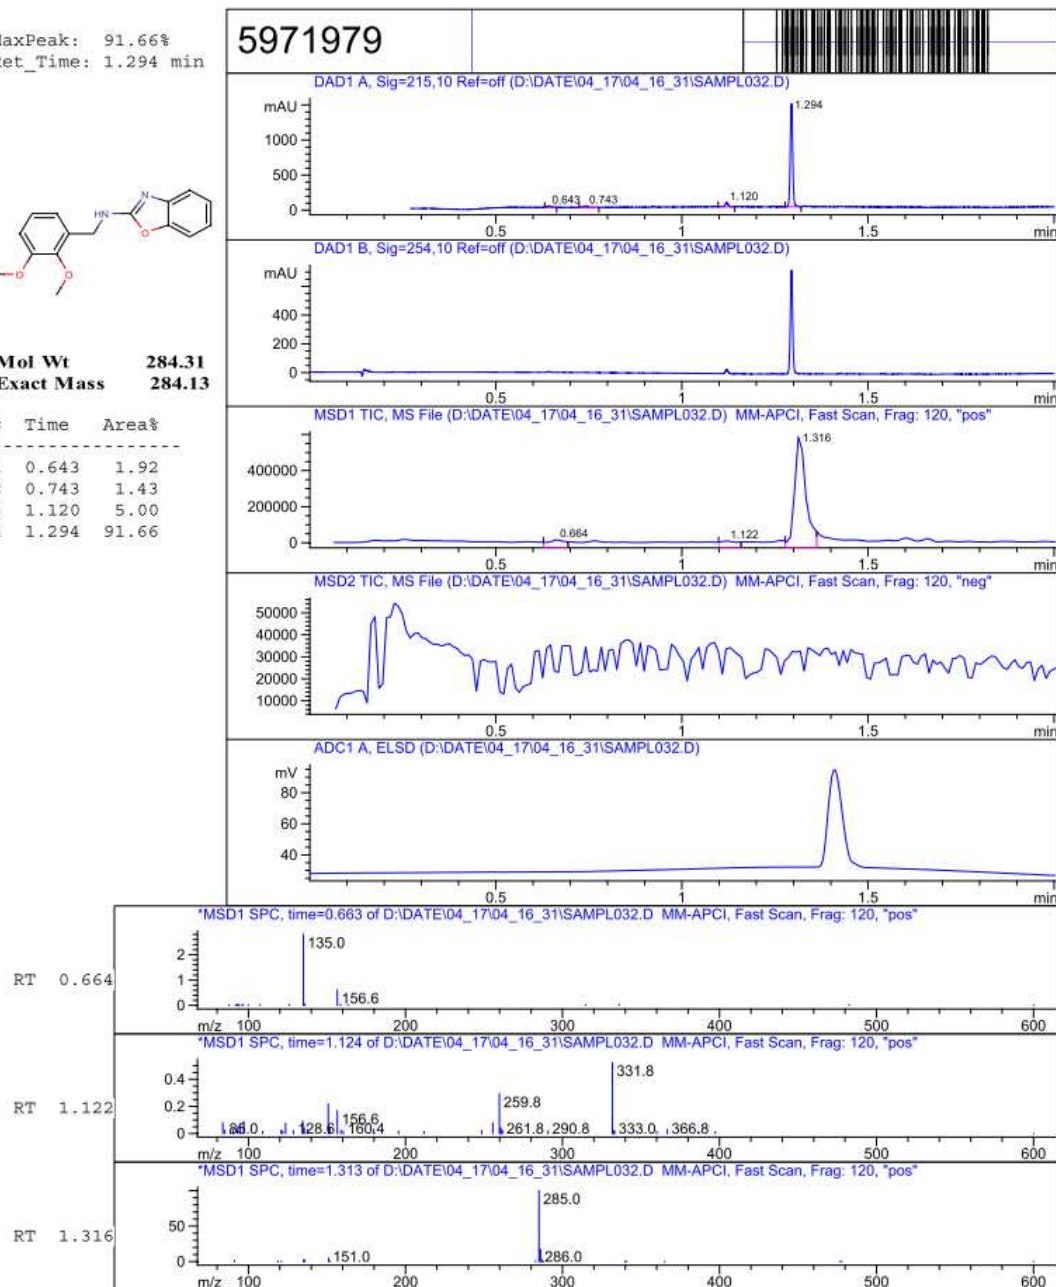

**Figure S3.** Entry 3, in Table 1: peaks were assigned to the starting amine (rt 0.64 min) and the product (rt 1.29 min).

MaxPeak: 82.85%  
Ret\_Time: 1.238 min

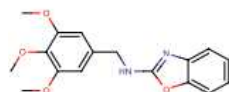

Mol Wt 314.34  
Exact Mass 314.14

| # | Time  | Area% |
|---|-------|-------|
| 1 | 0.650 | 3.24  |
| 2 | 0.730 | 3.33  |
| 3 | 1.082 | 8.71  |
| 4 | 1.182 | 1.87  |
| 5 | 1.238 | 82.85 |

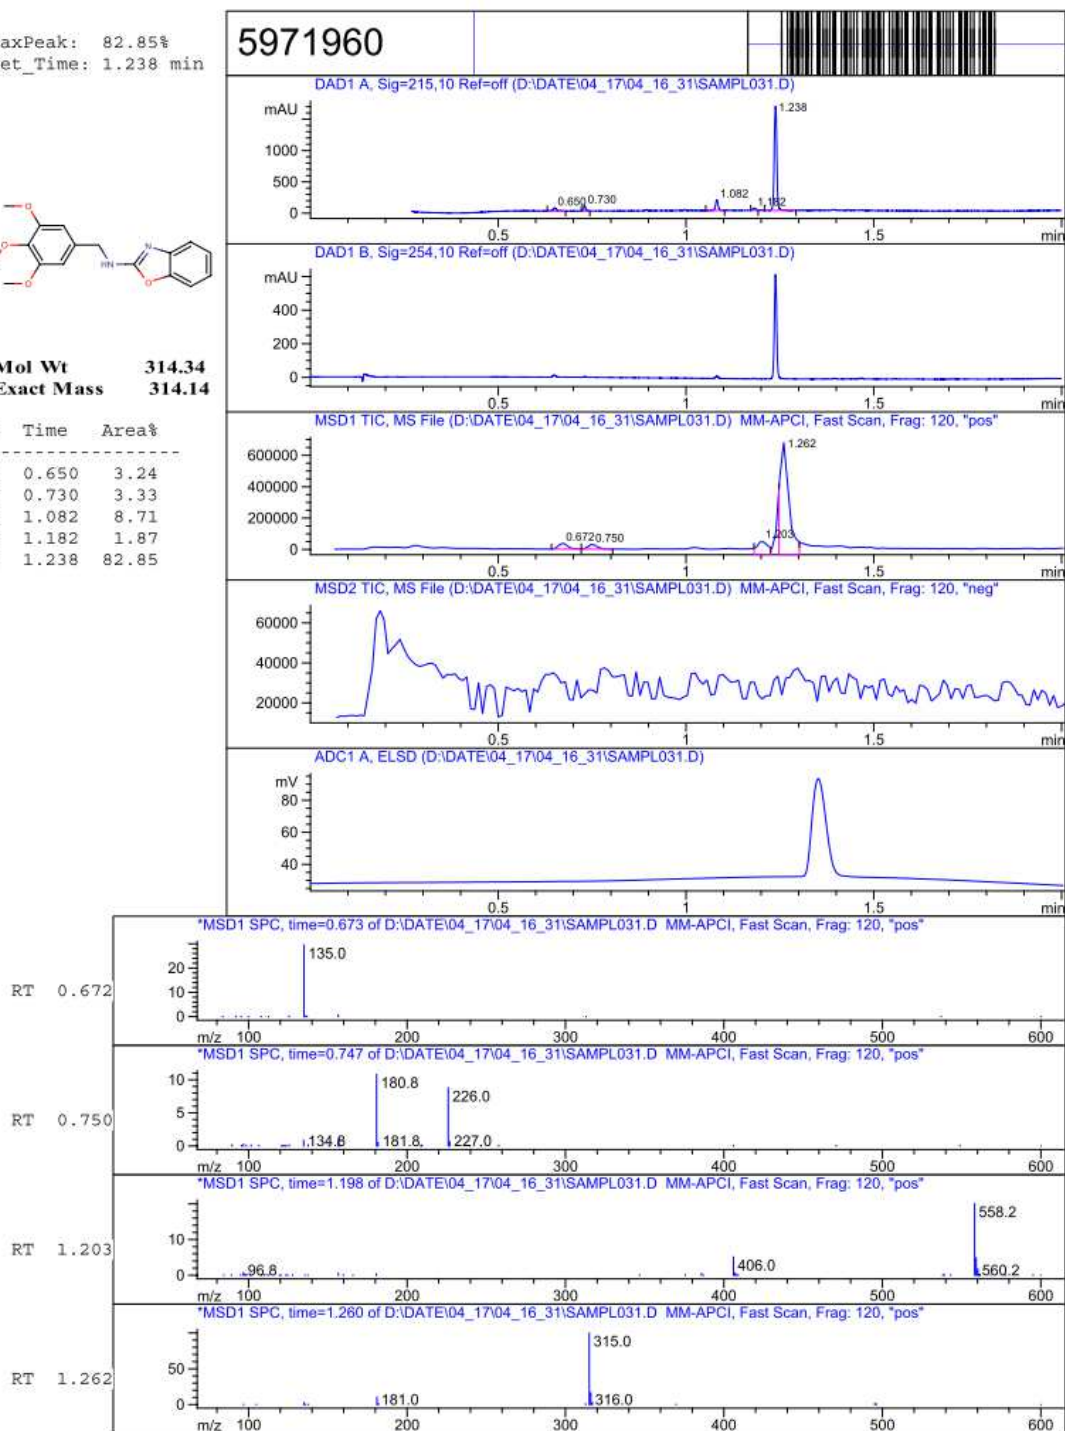

**Figure S4.** Entry 4, in Table 1: peaks were assigned to the starting amine (rt 0.65 min), the aldehyde (rt 1.08 min) and the product (rt 1.23 min).

MaxPeak: 100.00%  
Ret\_Time: 1.024 min

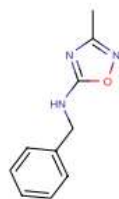

Mol Wt 189.21  
Exact Mass 189.1

| # | Time  | Area%  |
|---|-------|--------|
| 1 | 1.024 | 100.00 |

RT 1.045

6151399

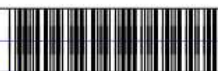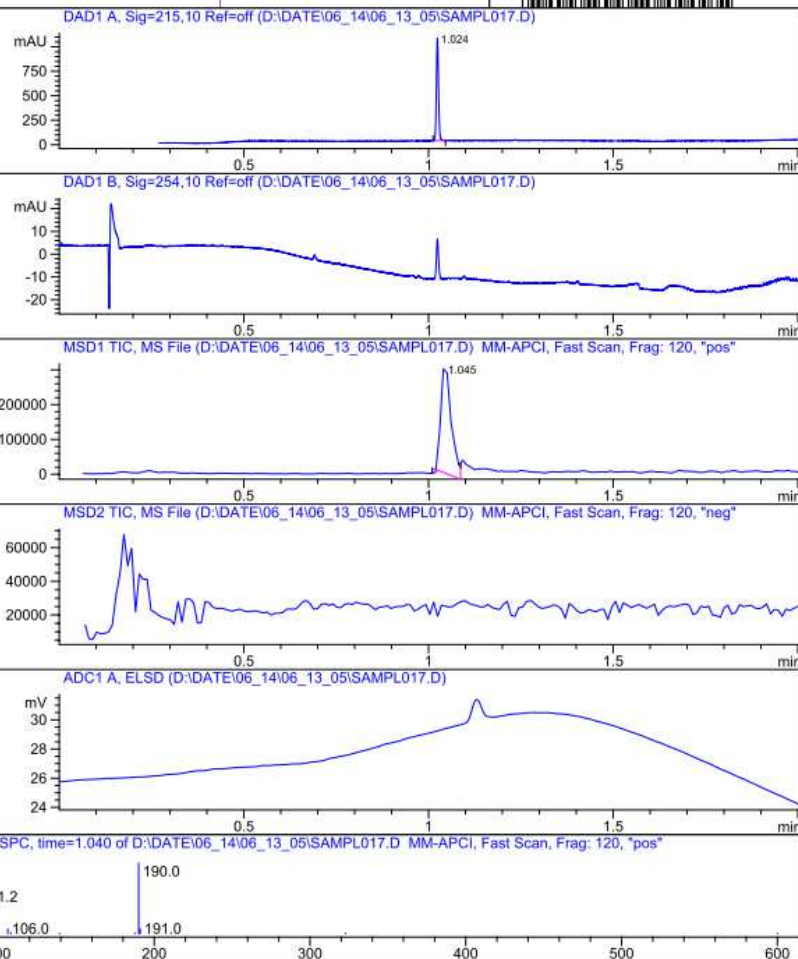

**Figure S5.** Entry 5, in Table 1: peak was assigned to the product (rt 1.02 min).

MaxPeak: 100.00%  
Ret\_Time: 1.058 min

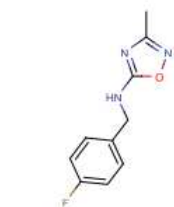

Mol Wt 207.2  
Exact Mass 207.09

| # | Time  | Area%  |
|---|-------|--------|
| 1 | 1.058 | 100.00 |

RT 1.080

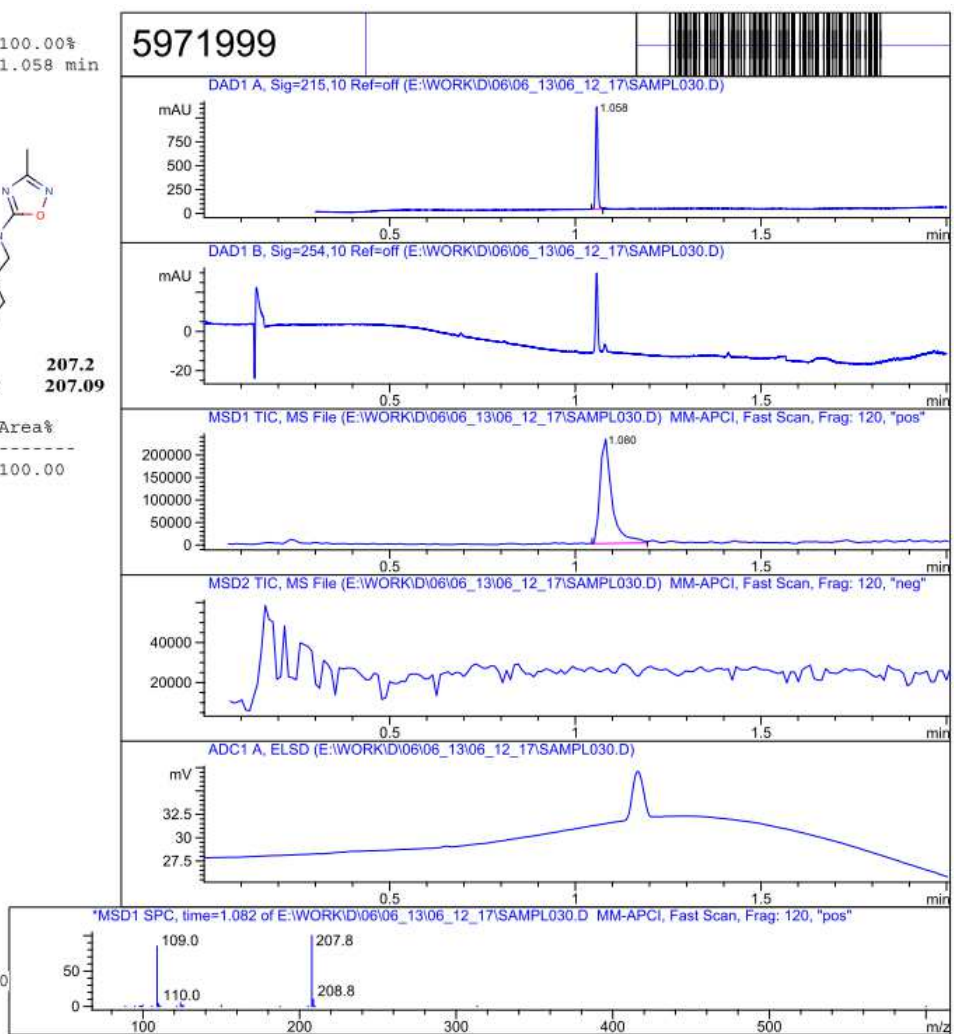

**Figure S6.** Entry 6, in Table 1: peak was assigned to the product (rt 1.06 min).



MaxPeak: 97.15%  
Ret\_Time: 0.996 min

6343155

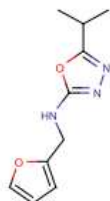

Mol Wt 207.23  
Exact Mass 207.11

| # | Time  | Area% |
|---|-------|-------|
| 1 | 0.640 | 2.85  |
| 2 | 0.996 | 97.15 |

RT 0.663

RT 1.020

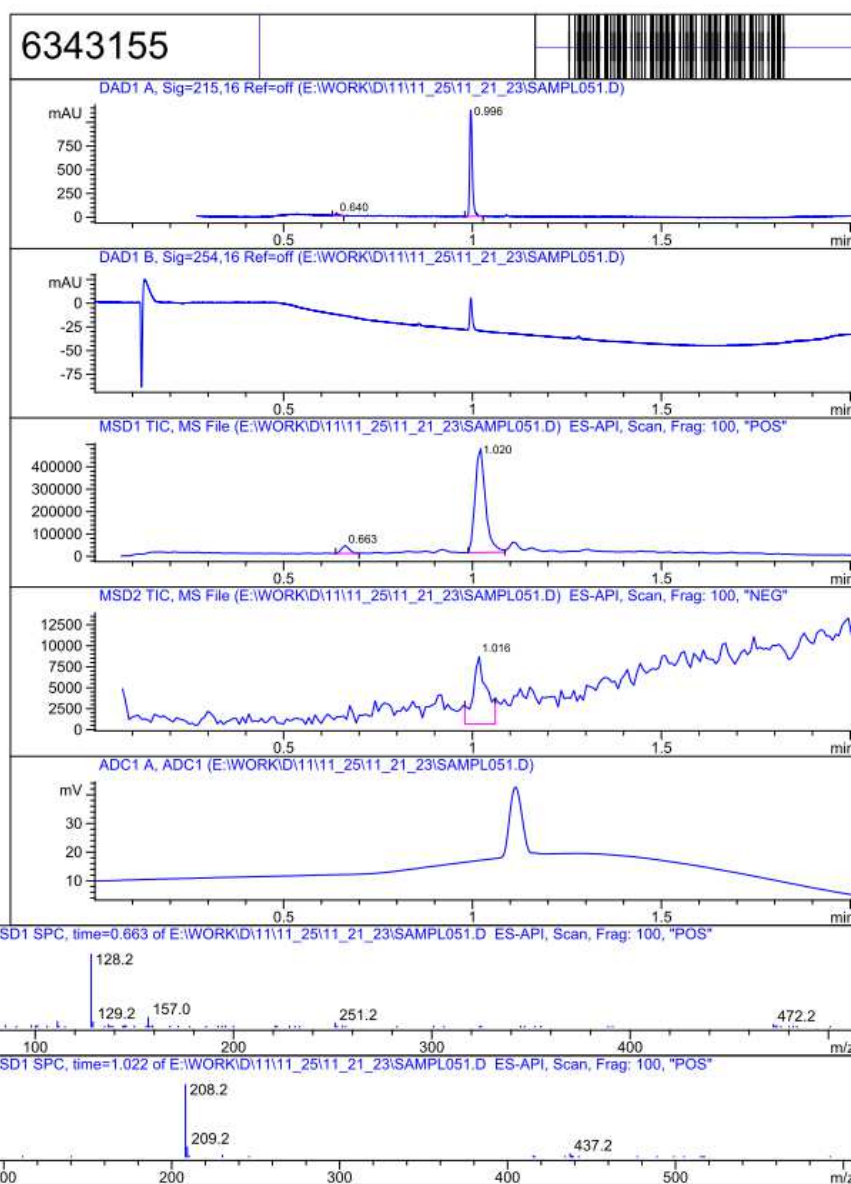

**Figure S7.** Entry 7, in Table 1: peaks were assigned to the starting amine (rt 0.66 min) and the product (rt 1.00 min).

MaxPeak: 100.00%  
Ret\_Time: 0.646 min

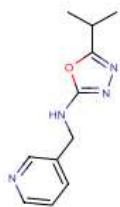

Mol Wt 218.26  
Exact Mass 218.13

| # | Time  | Area%  |
|---|-------|--------|
| 1 | 0.646 | 100.00 |

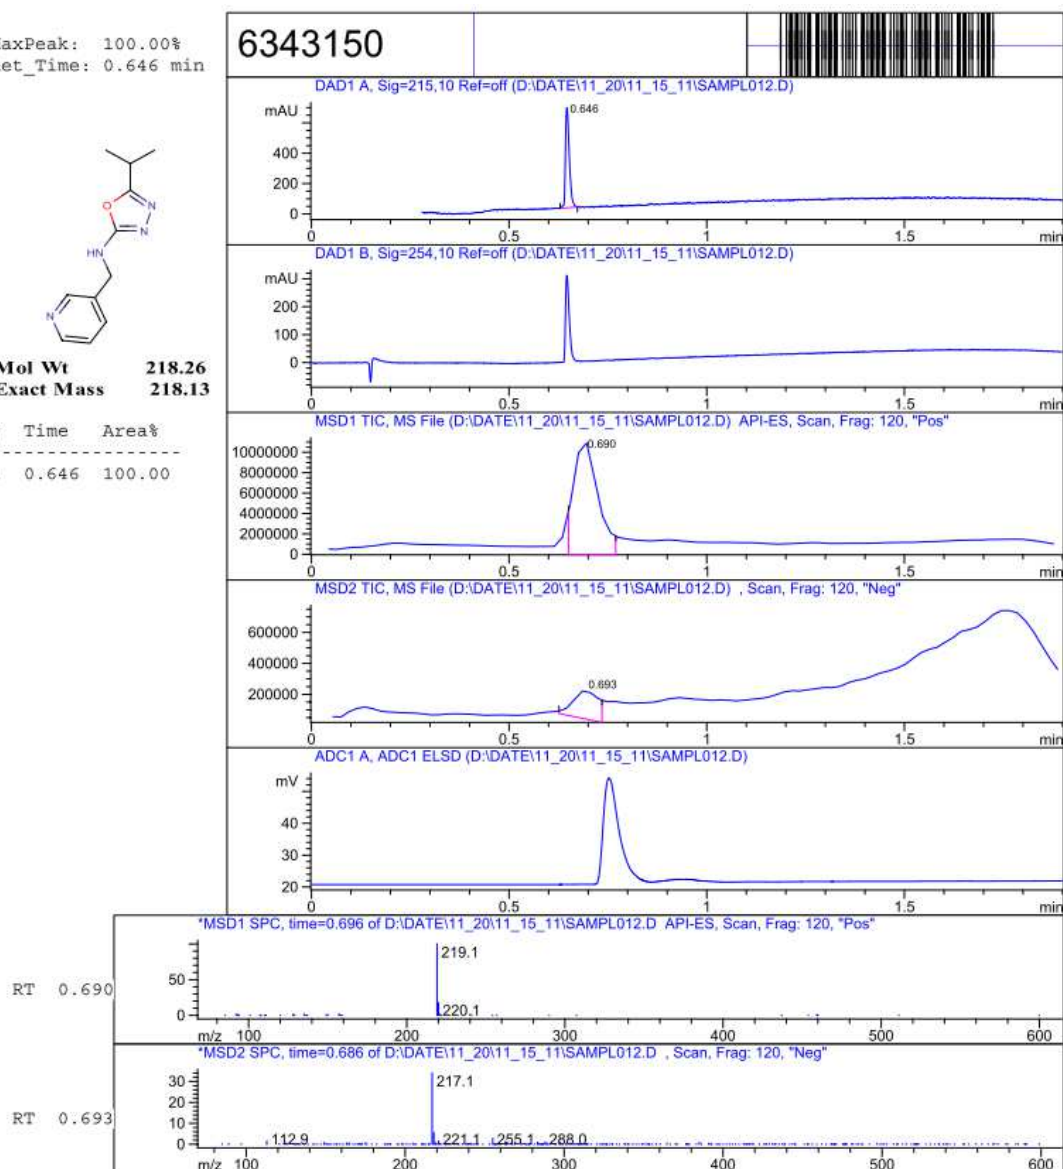

**Figure S8.** Entry 8, in Table 1: peak was assigned to the product (rt 0.65 min).

MaxPeak: 57.67%  
Ret\_Time: 1.173 min

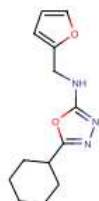

Mol Wt 247.29  
Exact Mass 247.15

| # | Time  | Area% |
|---|-------|-------|
| 1 | 0.907 | 42.33 |
| 2 | 1.173 | 57.67 |

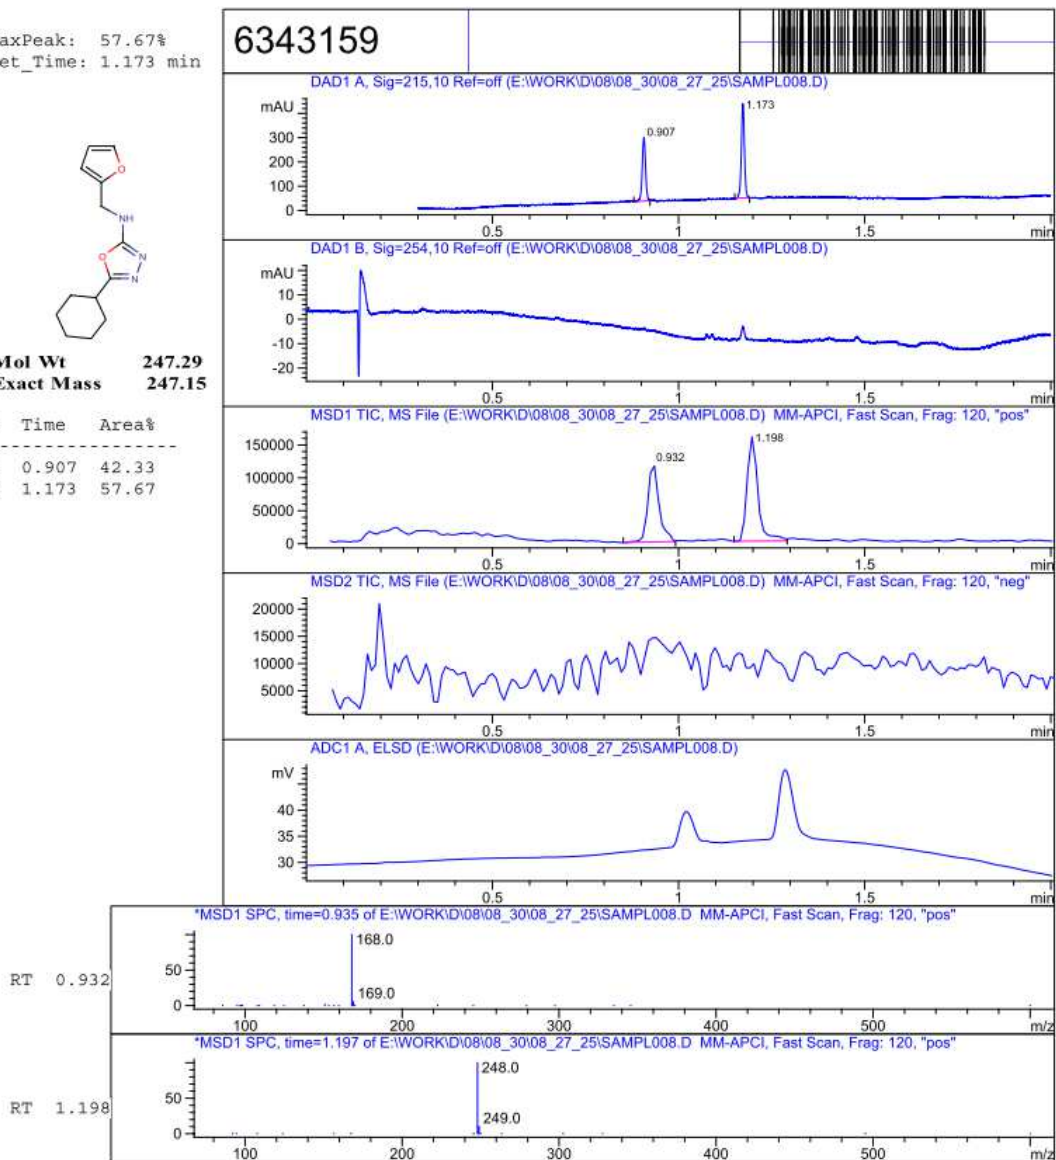

**Figure S9.** Entry 9, in Table 1: peaks were assigned to the starting amine (rt 0.91 min) and the product (rt 1.17 min).



MaxPeak: 91.82%  
Ret\_Time: 1.116 min

6348307

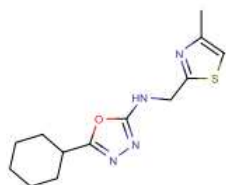

Mol Wt 278.37  
Exact Mass 278.14

| # | Time  | Area% |
|---|-------|-------|
| 1 | 0.889 | 8.18  |
| 2 | 1.116 | 91.82 |

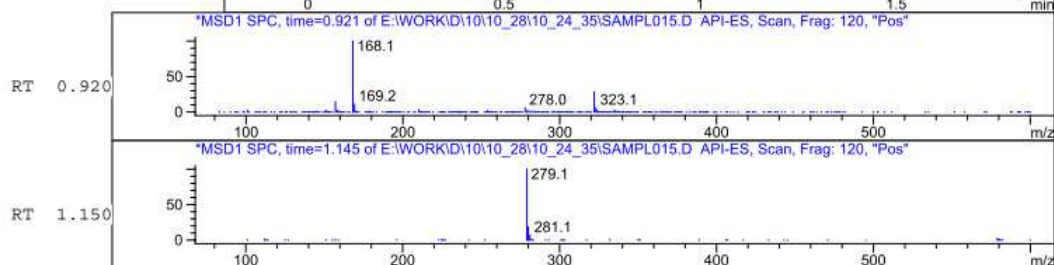

**Figure S10.** Entry 10, in Table 1: peaks were assigned to the starting amine (rt 0.89 min) and the product (rt 1.12 min).

MaxPeak: 85.43%  
Ret\_Time: 0.869 min

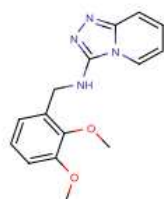

Mol Wt 284.31  
Exact Mass 284.14

| # | Time  | Area% |
|---|-------|-------|
| 1 | 0.869 | 85.43 |
| 2 | 0.993 | 4.34  |
| 3 | 1.052 | 7.10  |
| 4 | 1.170 | 3.13  |

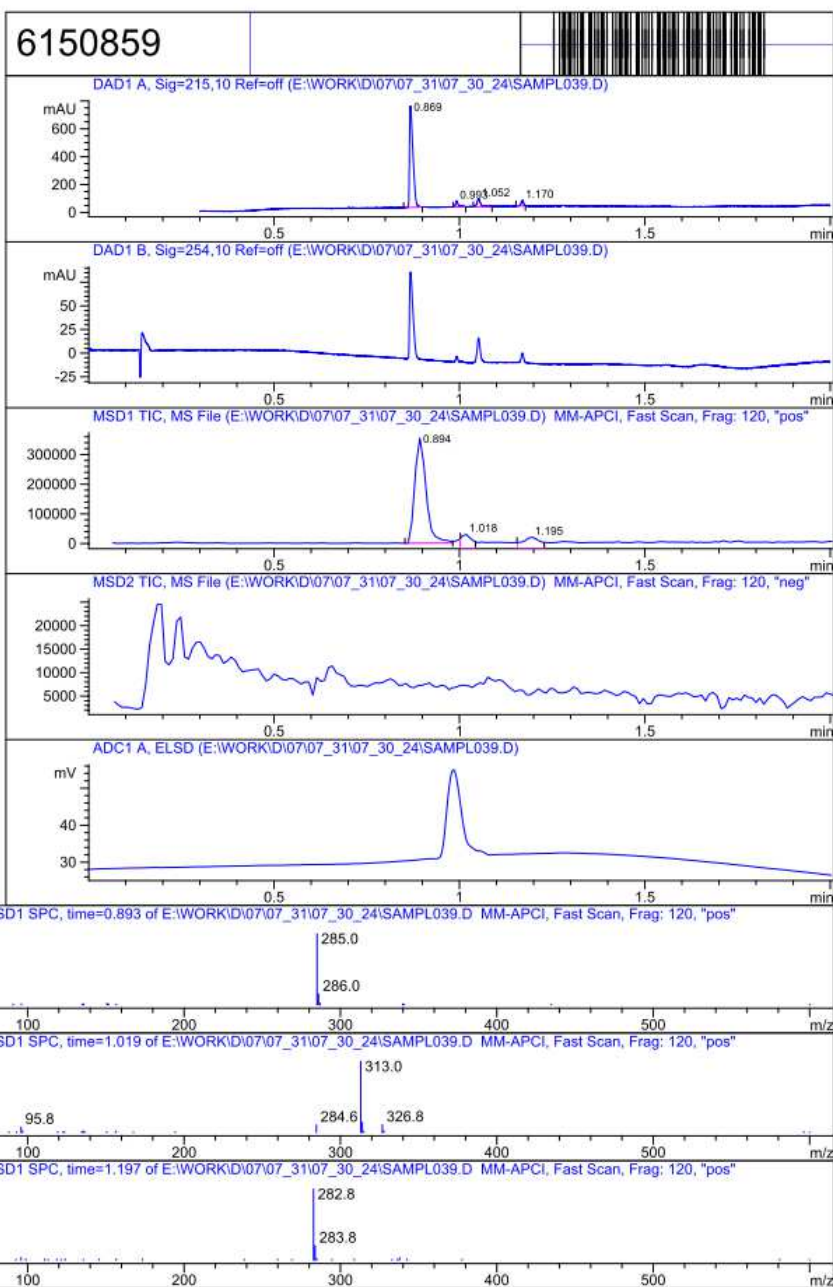

**Figure S11.** Entry 11, in Table 1: peak was assigned to the product (rt 0.87 min).

MaxPeak: 73.73%  
Ret\_Time: 0.856 min

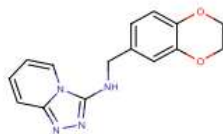

Mol Wt 282.3  
Exact Mass 282.12

| # | Time  | Area% |
|---|-------|-------|
| 1 | 0.835 | 8.70  |
| 2 | 0.856 | 73.73 |
| 3 | 0.888 | 2.83  |
| 4 | 0.989 | 10.55 |
| 5 | 1.141 | 4.19  |

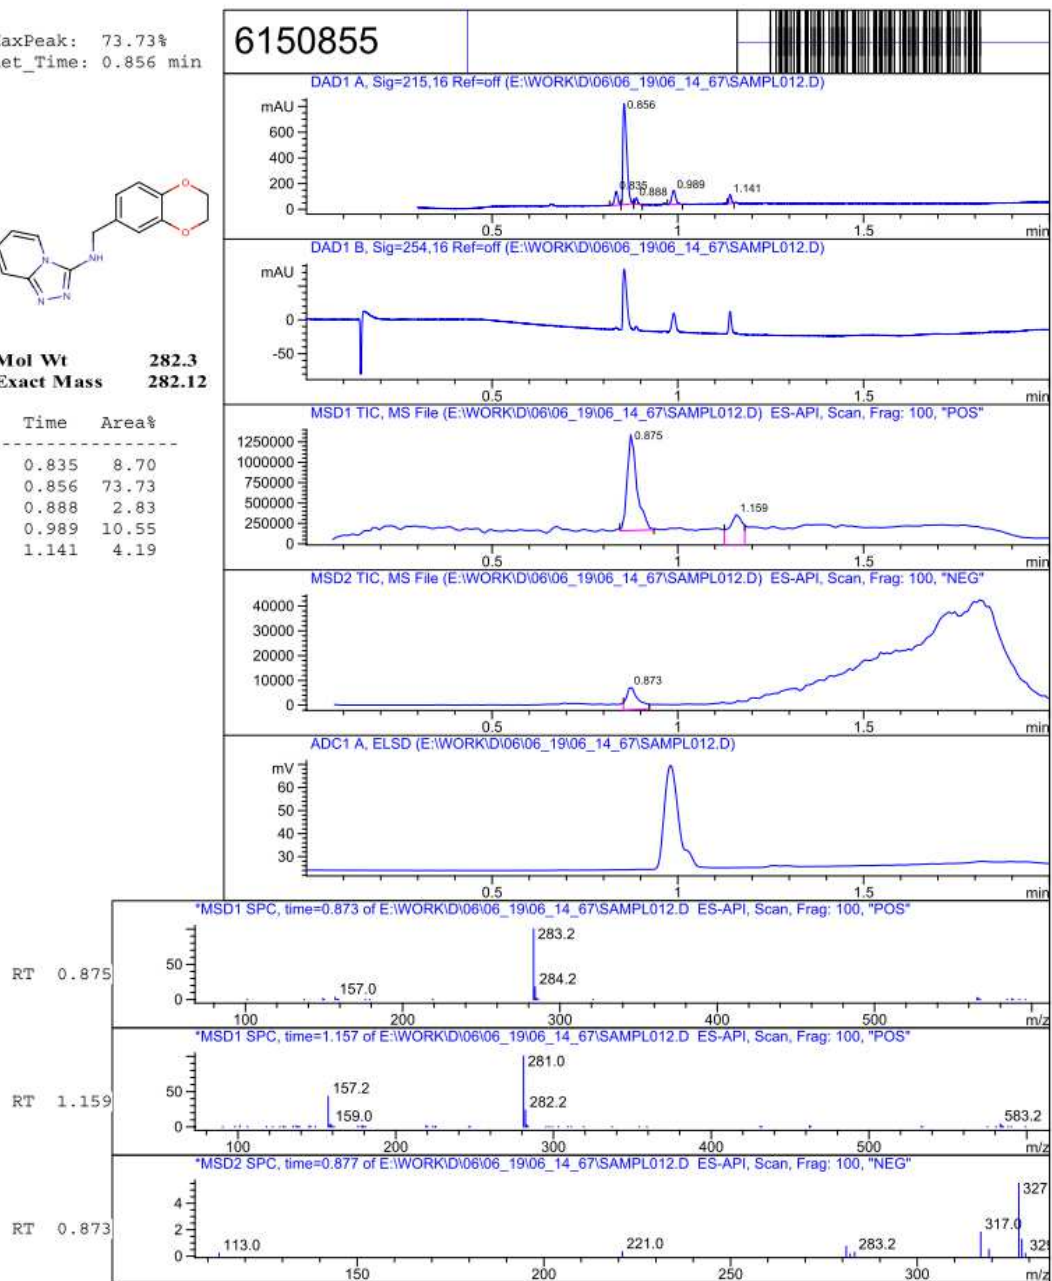

**Figure S12.** Entry 12, in Table 1: peaks were assigned to the product (rt 0.86 min), the aldehyde (rt 0.99 min), and the intermediate imine (rt 1.14 min).

MaxPeak: 100.00%  
Ret\_Time: 0.858 min

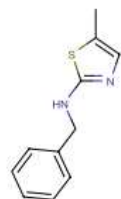

Mol Wt 204.29  
Exact Mass 204.09

| # | Time  | Area%  |
|---|-------|--------|
| 1 | 0.858 | 100.00 |

6150473

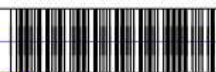

DAD1 A, Sig=215,10 Ref=off (D:\DATE\06\_14\06\_12\_28\SAMPL026.D)

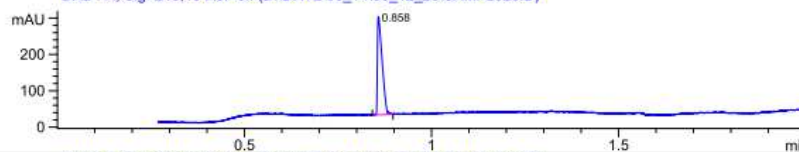

DAD1 B, Sig=254,10 Ref=off (D:\DATE\06\_14\06\_12\_28\SAMPL026.D)

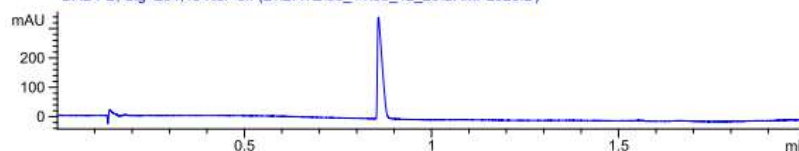

MSD1 TIC, MS File (D:\DATE\06\_14\06\_12\_28\SAMPL026.D) MM-APCI, Fast Scan, Frag: 120, "pos"

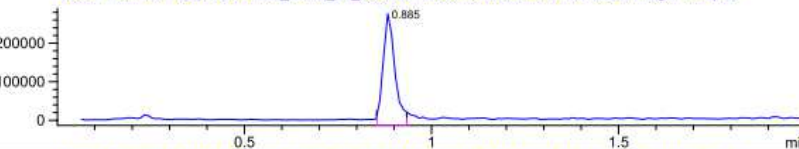

MSD2 TIC, MS File (D:\DATE\06\_14\06\_12\_28\SAMPL026.D) MM-APCI, Fast Scan, Frag: 120, "neg"

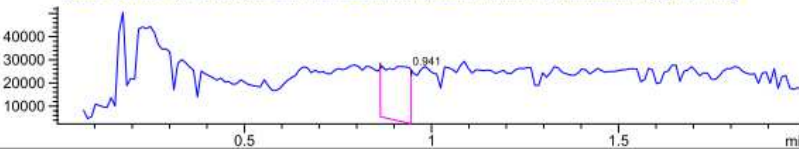

ADC1 A, ELSD (D:\DATE\06\_14\06\_12\_28\SAMPL026.D)

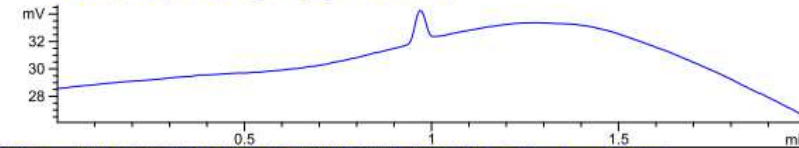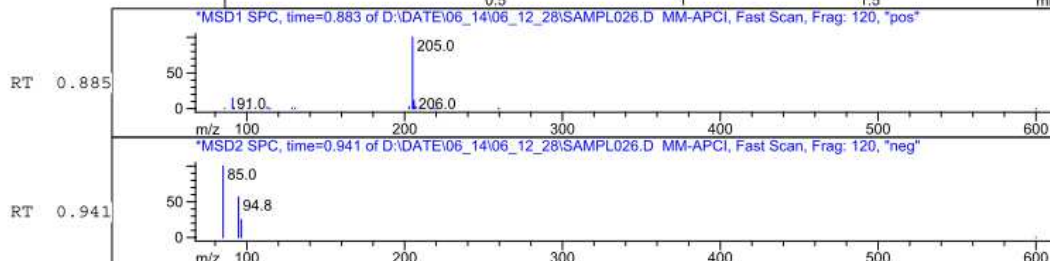

Figure S13. Entry 13, in Table 1: peak was assigned to the product (rt 0.86 min).

MaxPeak: 63.93%  
Ret\_Time: 0.910 min

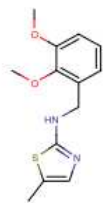

Mol Wt 264.34  
Exact Mass 264.11

| # | Time  | Area% |
|---|-------|-------|
| 1 | 0.702 | 3.61  |
| 2 | 0.884 | 4.40  |
| 3 | 0.910 | 63.93 |
| 4 | 1.006 | 1.69  |
| 5 | 1.079 | 20.49 |
| 6 | 1.212 | 5.87  |

6150475

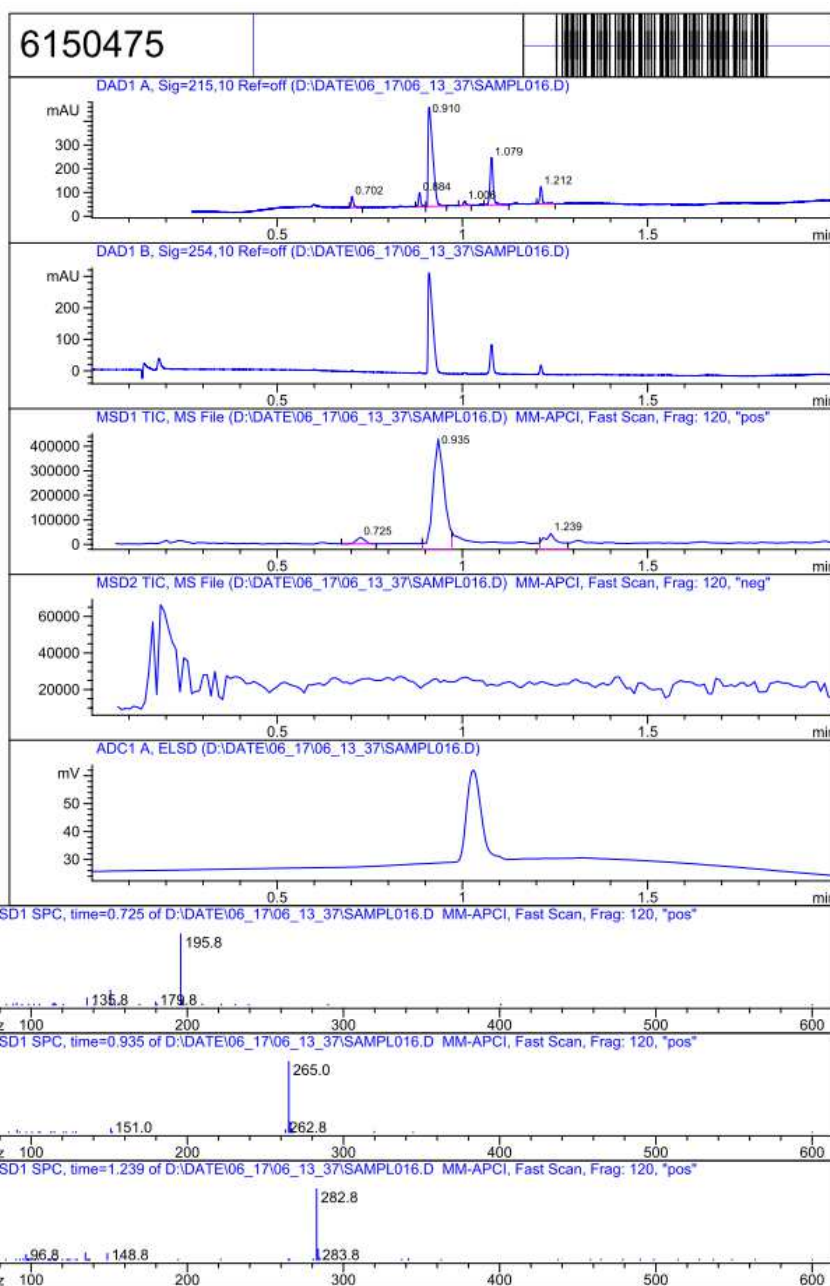

**Figure S14.** Entry 14, in Table 1: peaks were assigned to the product (rt 0.91 min) and the aldehyde (rt 1.08 min).



MaxPeak: 84.24%  
Ret\_Time: 1.198 min

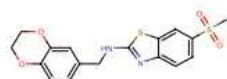

Mol Wt 376.45  
Exact Mass 376.06

| # | Time  | Area% |
|---|-------|-------|
| 1 | 0.730 | 7.36  |
| 2 | 0.925 | 1.25  |
| 3 | 1.046 | 4.43  |
| 4 | 1.198 | 84.24 |
| 5 | 1.231 | 2.72  |

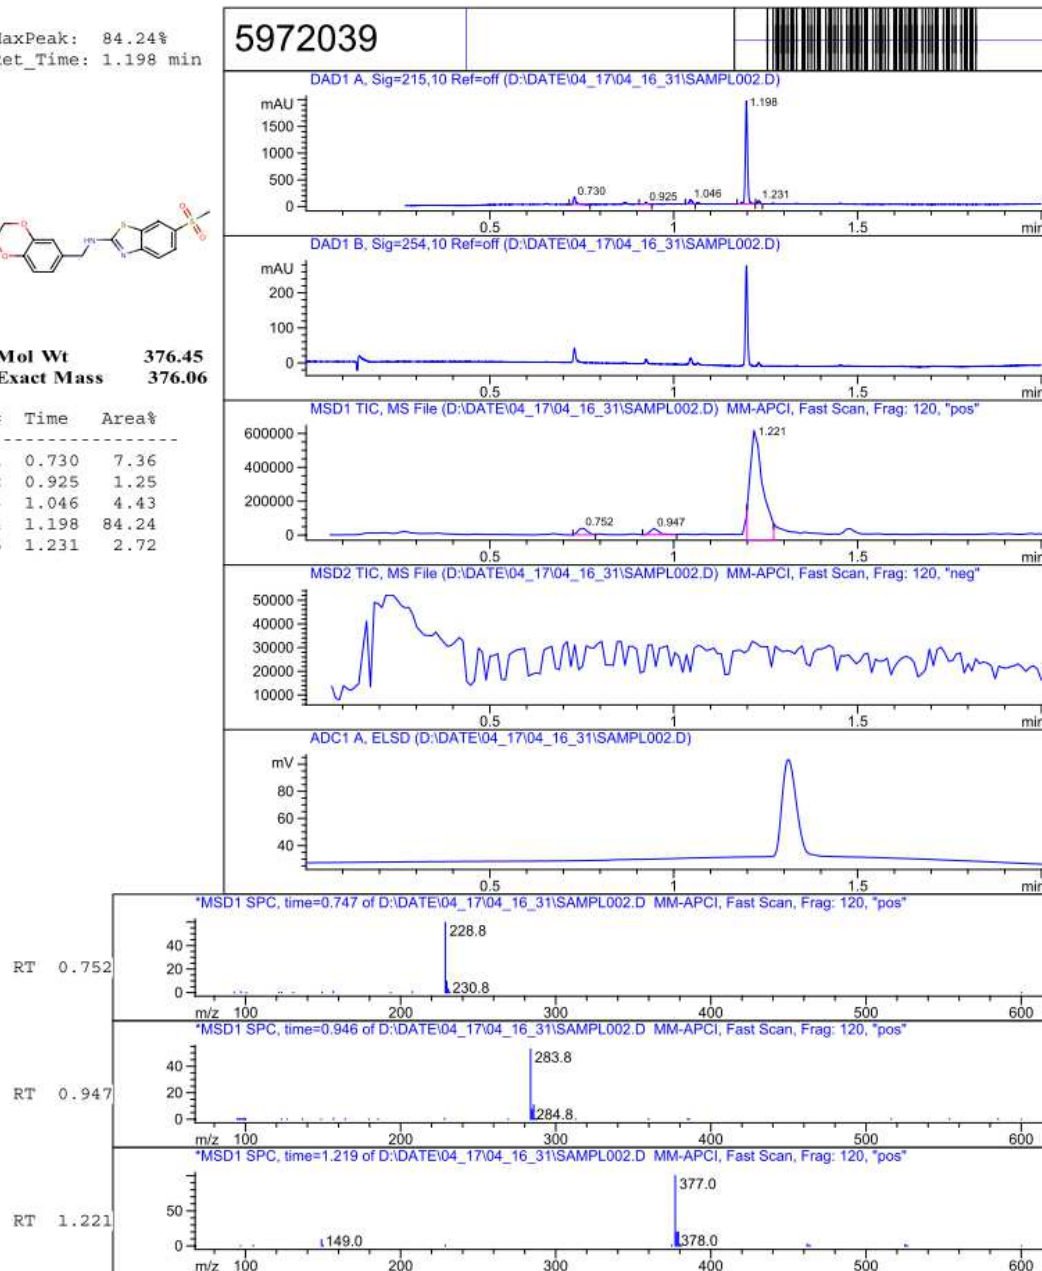

**Figure S15.** Entry 15, in Table 1: peaks were assigned to the starting amine (rt 0.73 min), the aldehyde (1.05 min), and the product (rt 1.2 min).

MaxPeak: 82.62%  
Ret\_Time: 1.174 min

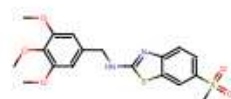

Mol Wt 408.49  
Exact Mass 408.09

| # | Time  | Area% |
|---|-------|-------|
| 1 | 0.730 | 7.39  |
| 2 | 0.892 | 1.72  |
| 3 | 1.080 | 8.27  |
| 4 | 1.174 | 82.62 |

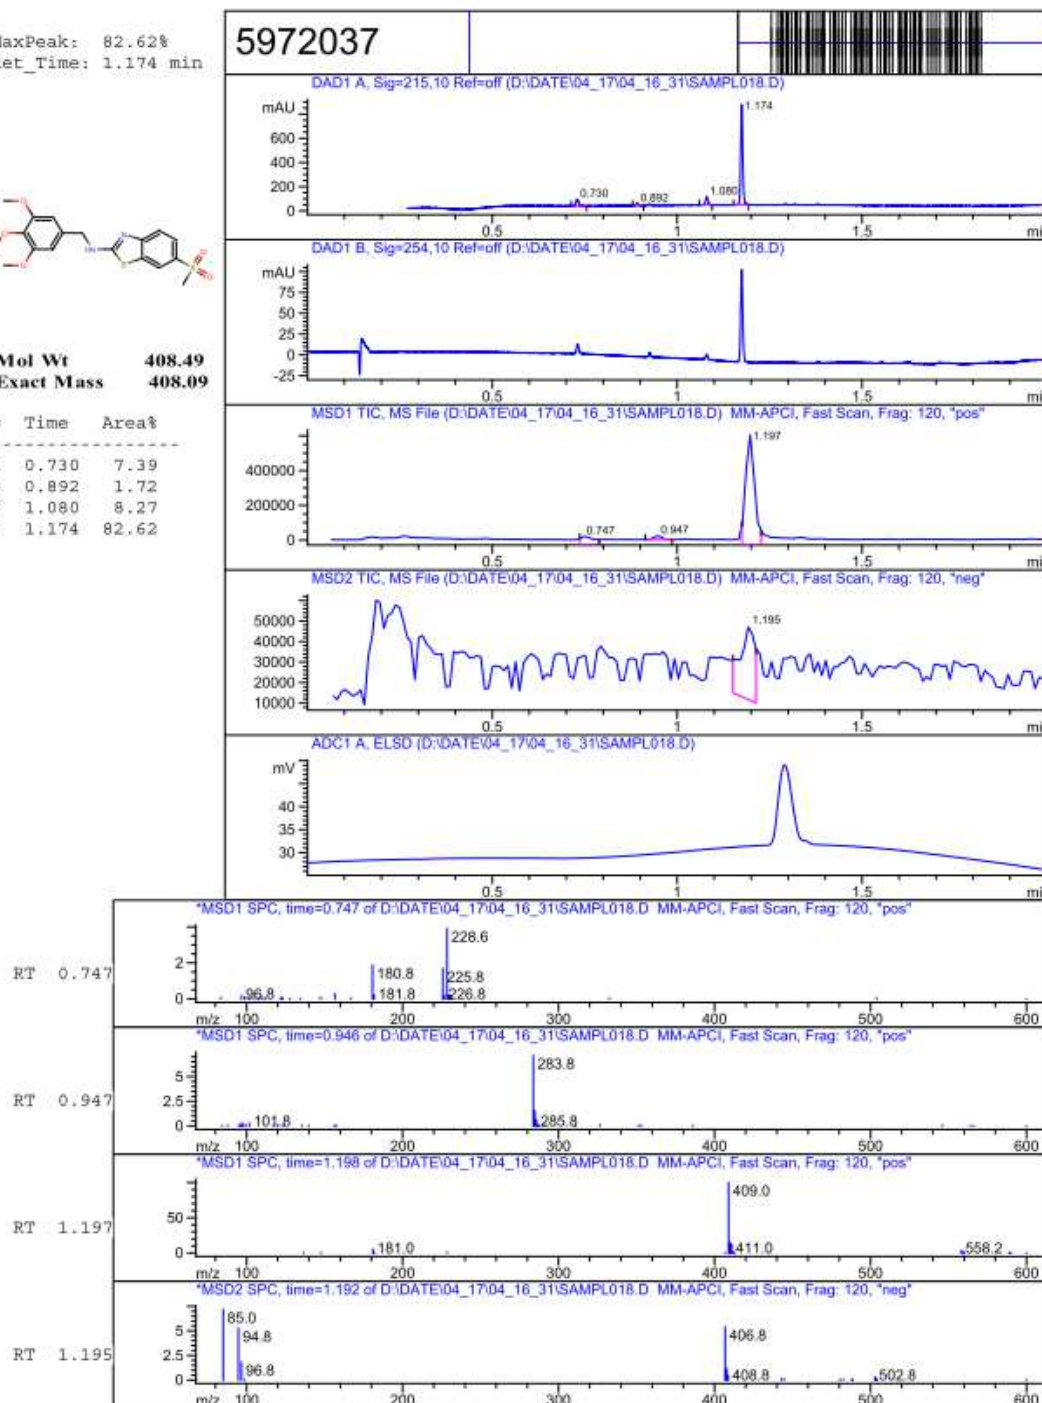

**Figure S 16.** Entry 16, in Table 1: peaks were assigned to the starting amine (rt 0.73 min), the aldehyde (1.08 min), and the product (rt 1.17 min).

MaxPeak: 100.00%  
Ret\_Time: 1.049 min

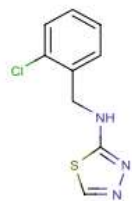

Mol Wt 225.7  
Exact Mass 225.02

| # | Time  | Area%  |
|---|-------|--------|
| 1 | 1.049 | 100.00 |

5971987

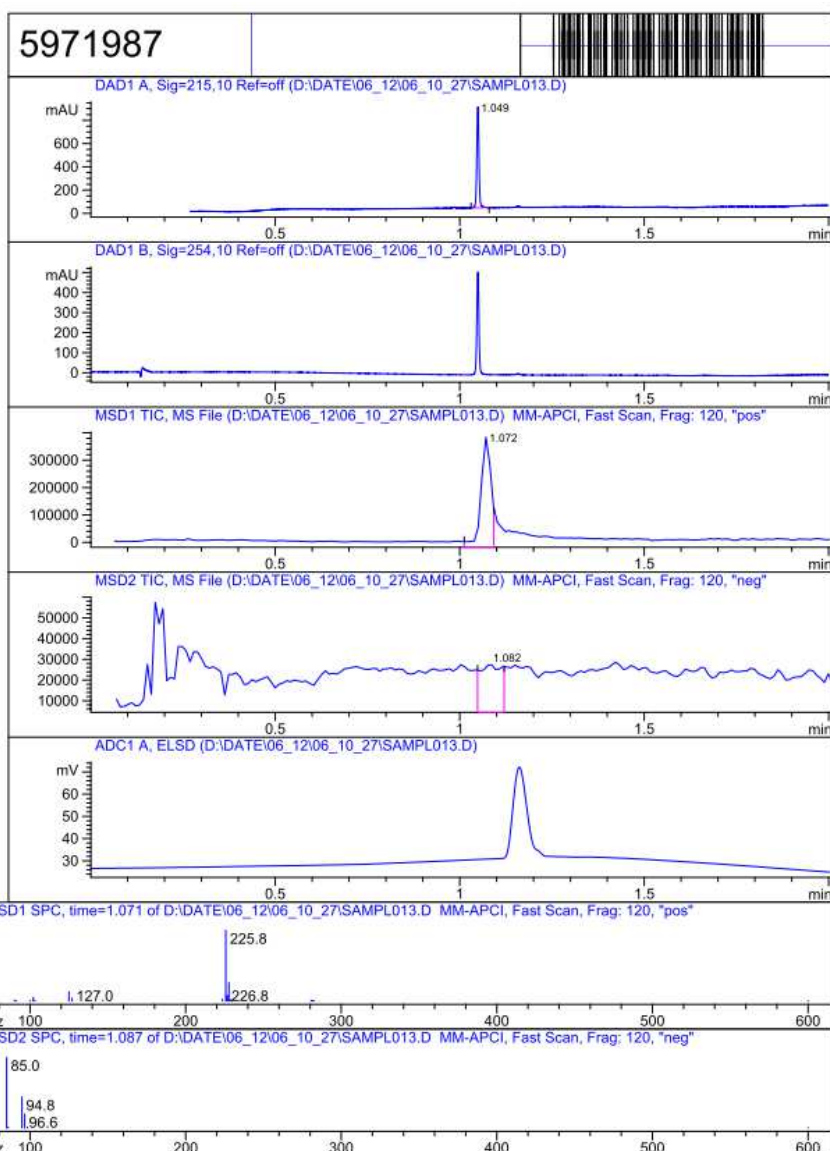

**Figure S17.** Entry 17, in Table 1: peak was assigned to the product (rt 1.05 min).



MaxPeak: 88.86%  
Ret\_Time: 0.964 min

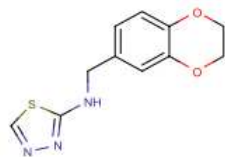

Mol Wt 249.29  
Exact Mass 249.06

| # | Time  | Area% |
|---|-------|-------|
| 1 | 0.964 | 88.86 |
| 2 | 1.006 | 11.14 |

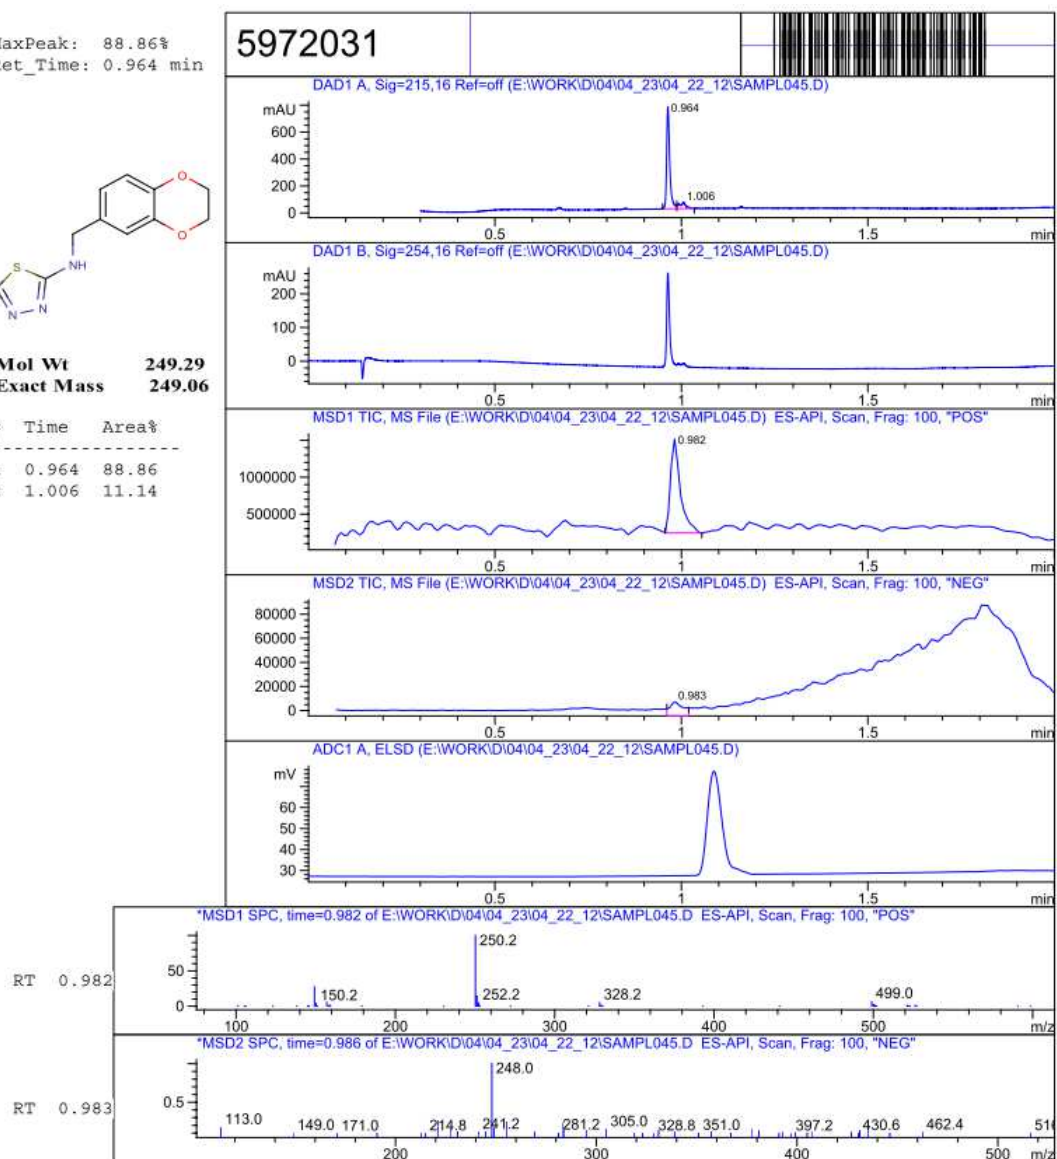

**Figure S18.** Entry 18, in Table 1: peaks were assigned to the product (rt 0.96 min) and the aldehyde (rt 1.01 min).

MaxPeak: 60.58%  
Ret\_Time: 0.837 min

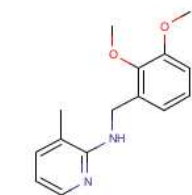

Mol Wt 258.32  
Exact Mass 258.16

| # | Time  | Area% |
|---|-------|-------|
| 1 | 0.816 | 2.86  |
| 2 | 0.837 | 60.58 |
| 3 | 0.983 | 34.20 |
| 4 | 1.068 | 2.35  |

6150456

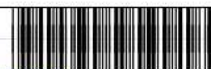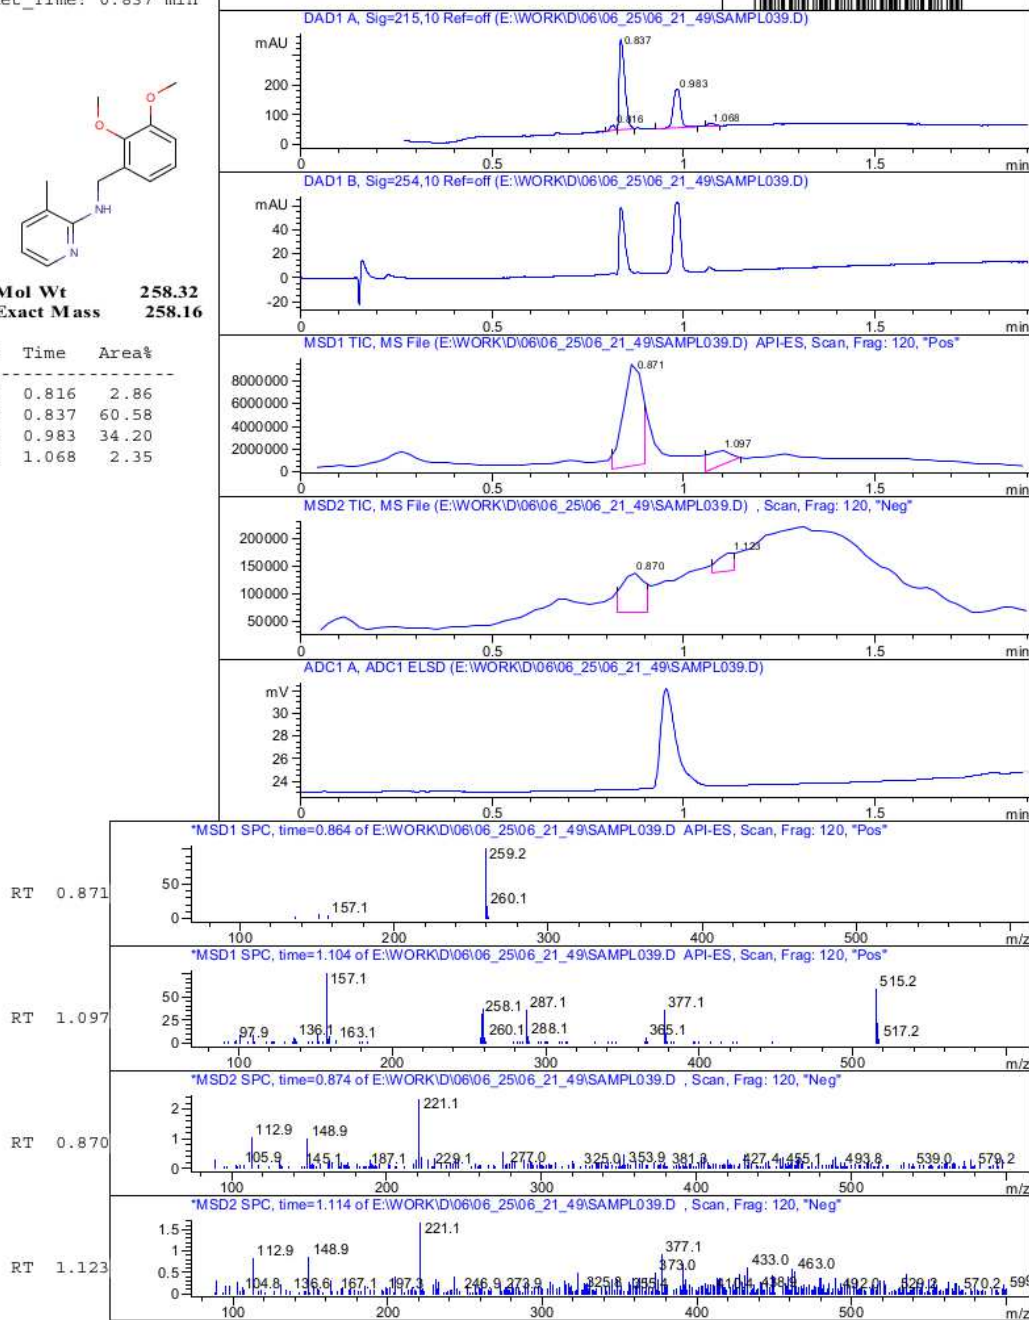

**Figure S19.** Entry 19, in Table 1: peaks were assigned to the product (rt 0.87 min), the aldehyde (rt 0.98 min), and the intermediate imine (rt 1.07 min).

MaxPeak: 57.93%  
Ret\_Time: 0.825 min

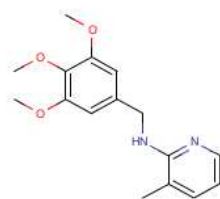

Mol Wt 288.34  
Exact Mass 288.17

| # | Time  | Area% |
|---|-------|-------|
| 1 | 0.688 | 2.18  |
| 2 | 0.825 | 57.93 |
| 3 | 0.849 | 5.86  |
| 4 | 1.030 | 30.32 |
| 5 | 1.216 | 3.71  |

6150454

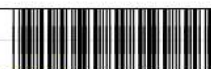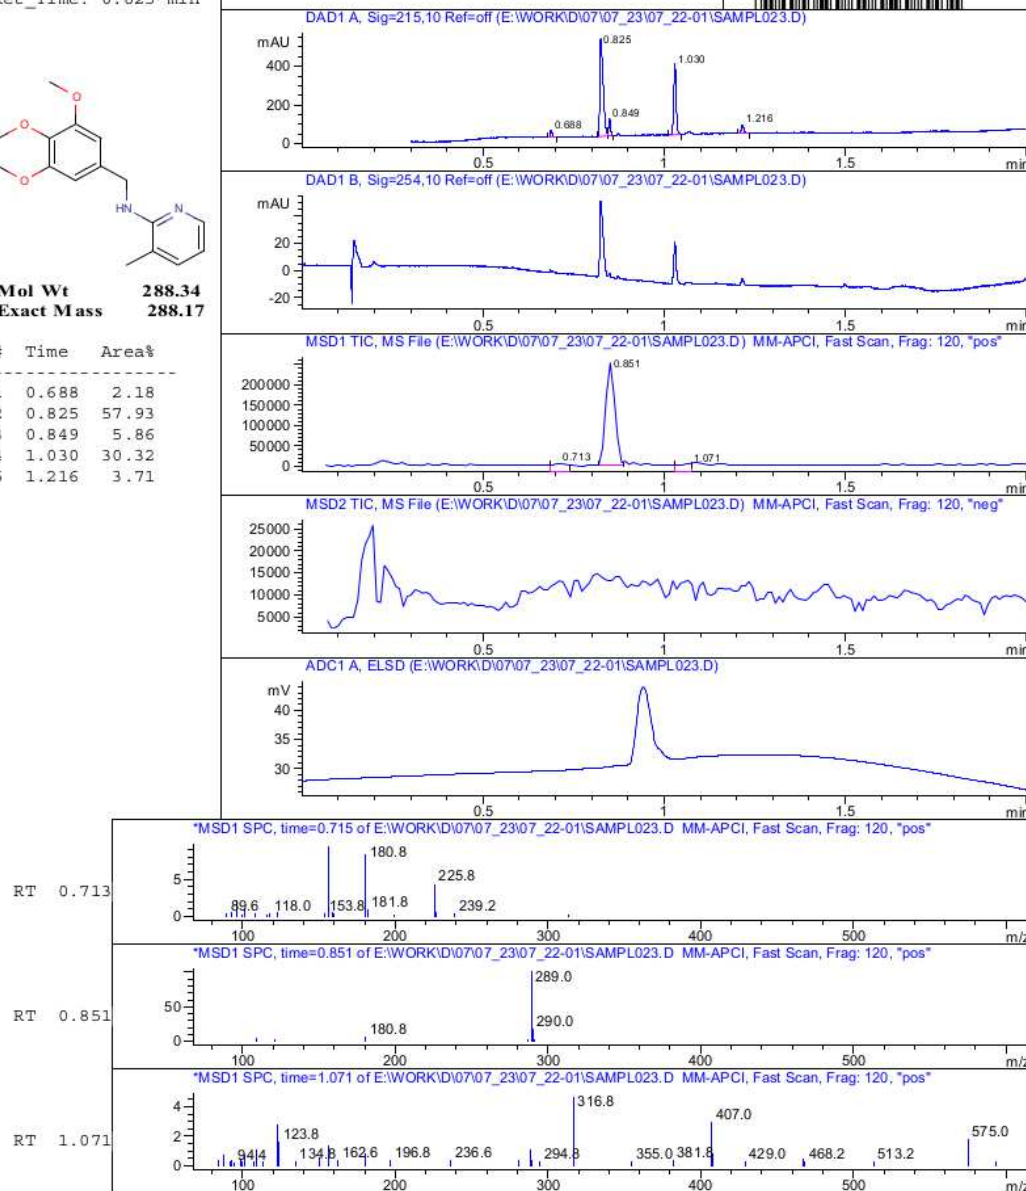

**Figure S20.** Entry 20, in Table 1: peaks were assigned to the product (rt 0.83 min) and the aldehyde (rt 1.03 min).

MaxPeak: 92.67%  
Ret\_Time: 0.660 min

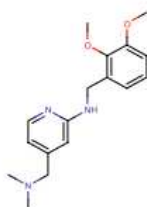

Mol Wt 301.38  
Exact Mass 301.21

| # | Time  | Area% |
|---|-------|-------|
| 1 | 0.660 | 92.67 |
| 2 | 0.703 | 1.69  |
| 3 | 0.742 | 1.34  |
| 4 | 0.784 | 1.11  |
| 5 | 0.921 | 1.72  |
| 6 | 1.091 | 1.48  |

RT 0.685

5972021

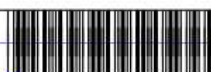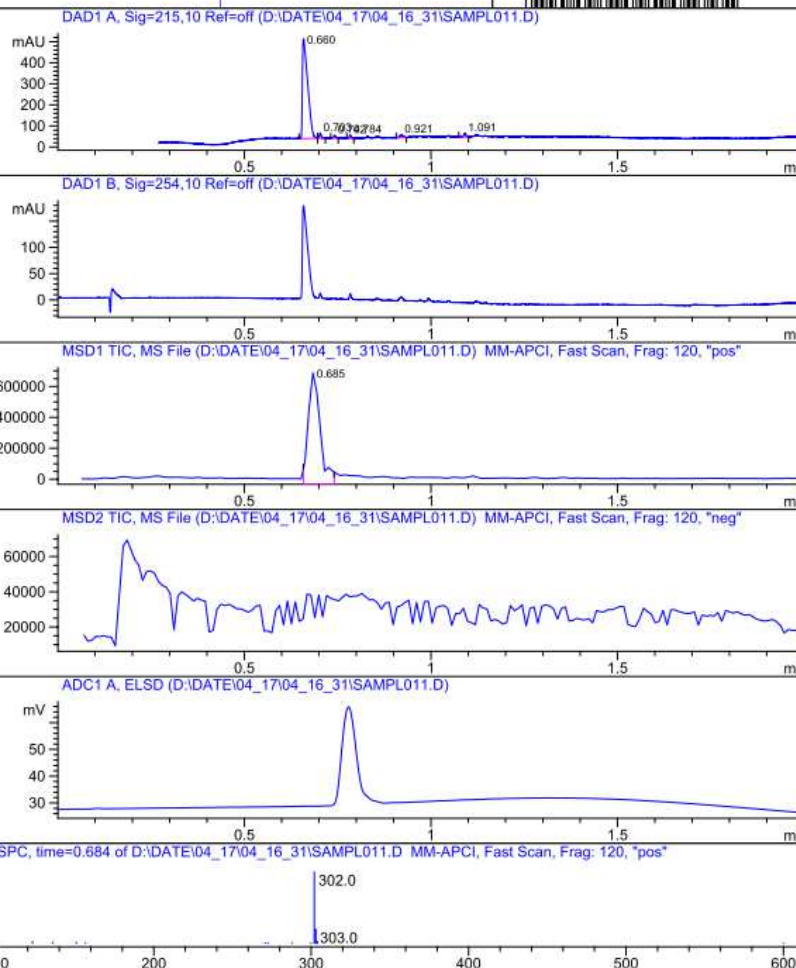

**Figure S21.** Entry 21, in Table 1: peak was assigned to the product (rt 0.66 min).

MaxPeak: 98.61%  
Ret\_Time: 0.671 min

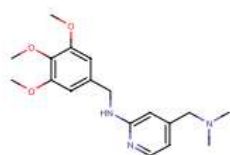

Mol Wt 331.41  
Exact Mass 331.22

| # | Time  | Area% |
|---|-------|-------|
| 1 | 0.671 | 98.61 |
| 2 | 0.726 | 1.39  |

5972018

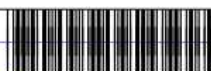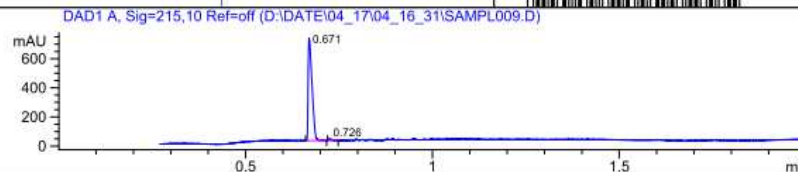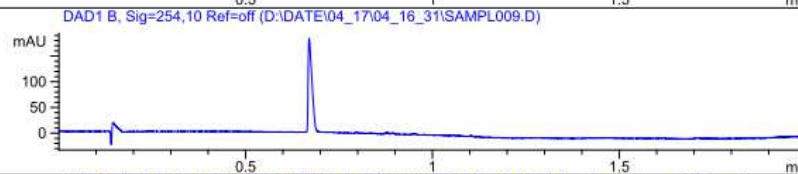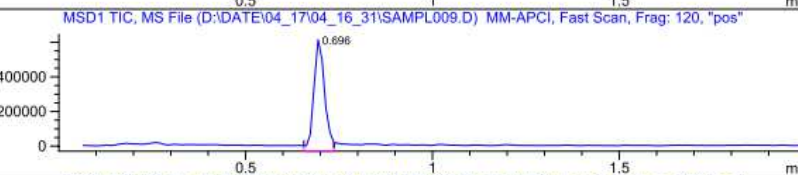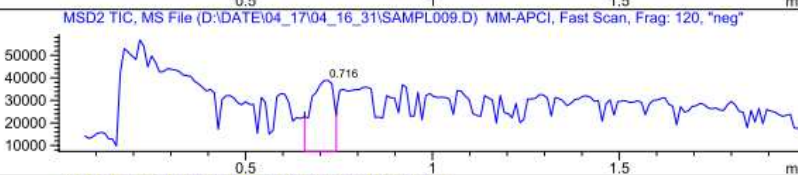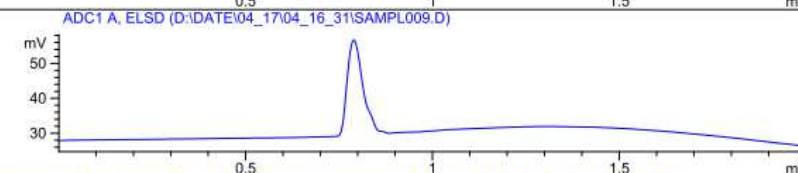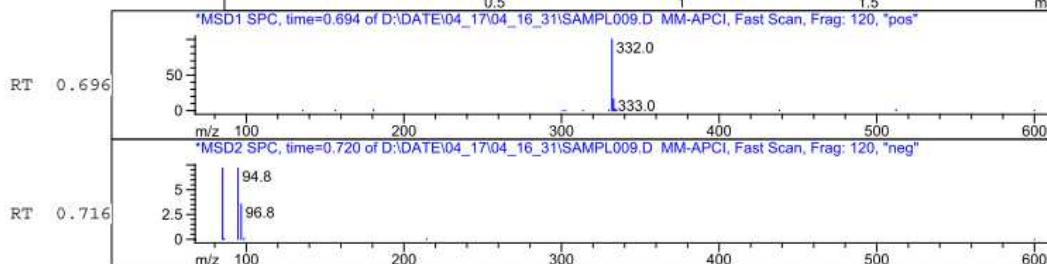

**Figure S22.** Entry 22, in Table 1: peak was assigned to the product (rt 0.67 min).



MaxPeak: 100.00%  
Ret\_Time: 0.730 min

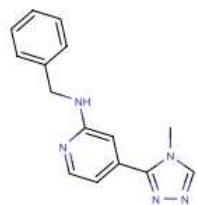

Mol Wt 265.31  
Exact Mass 265.15

| # | Time  | Area%  |
|---|-------|--------|
| 1 | 0.730 | 100.00 |

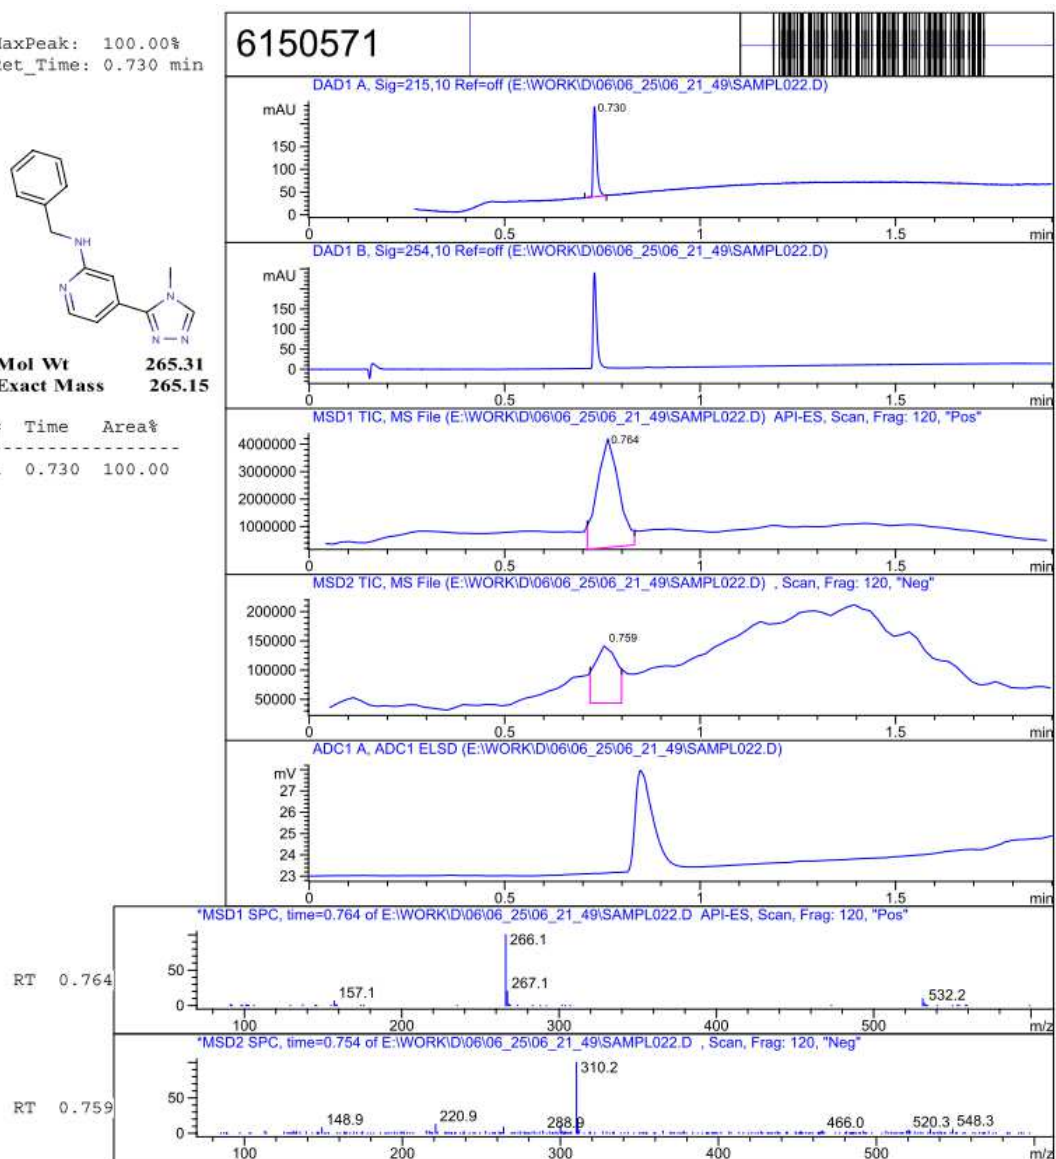

**Figure S23.** Entry 23, in Table 1: peak was assigned to the product (rt 0.73 min).

MaxPeak: 77.91%  
Ret\_Time: 0.856 min

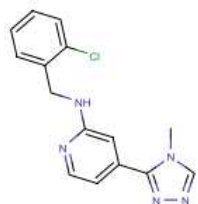

Mol Wt 299.76  
Exact Mass 299.11

| # | Time  | Area% |
|---|-------|-------|
| 1 | 0.856 | 77.91 |
| 2 | 0.987 | 13.00 |
| 3 | 1.101 | 2.01  |
| 4 | 1.161 | 3.61  |
| 5 | 1.376 | 3.46  |

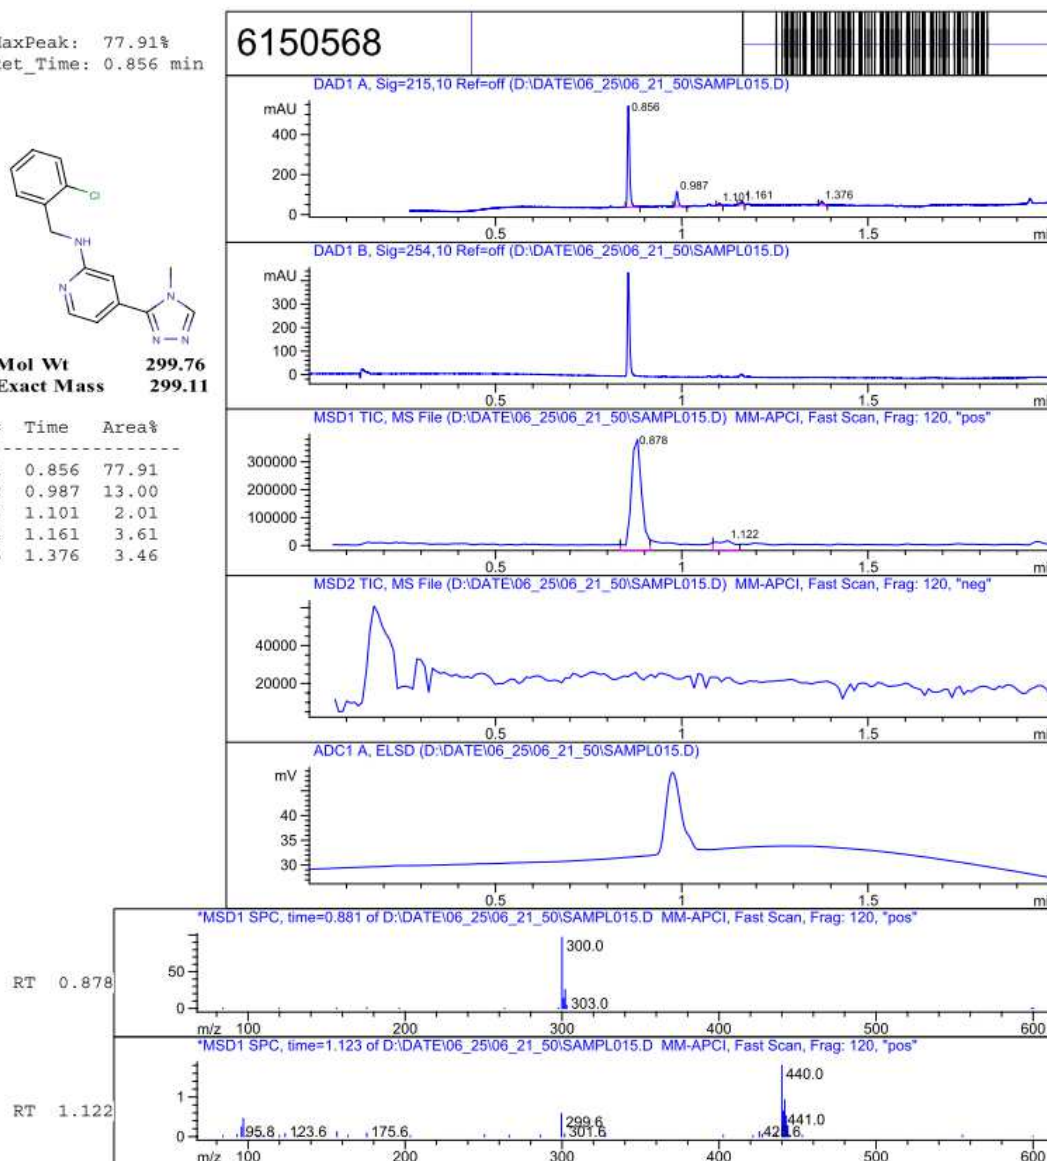

**Figure S24.** Entry 24, in Table 1: peaks were assigned to the product (rt 0.86 min), the aldehyde (0.99 min), and the tertiary amine (1.1 min).

MaxPeak: 96.56%  
Ret\_Time: 1.253 min

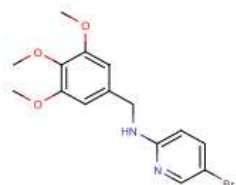

Mol Wt 353.21  
Exact Mass 352.06

| # | Time  | Area% |
|---|-------|-------|
| 1 | 0.728 | 2.02  |
| 2 | 0.996 | 1.42  |
| 3 | 1.253 | 96.56 |

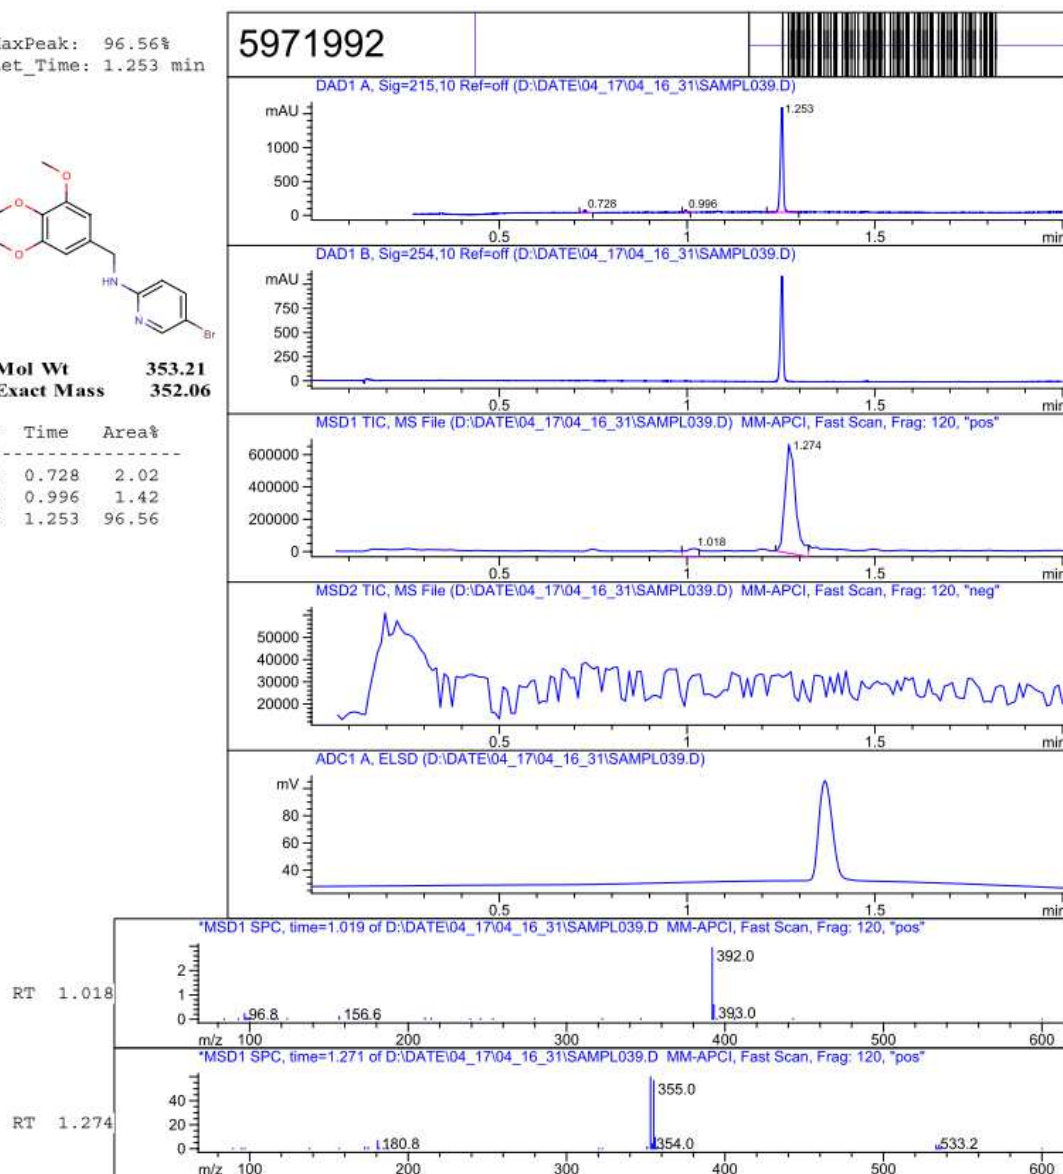

**Figure S25.** Entry 25, in Table 1: peak was assigned to the product (rt 1.25 min).



MaxPeak: 52.95%  
Ret\_Time: 0.781 min

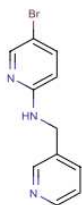

Mol Wt 264.12  
Exact Mass 263.02

| # | Time  | Area% |
|---|-------|-------|
| 1 | 0.293 | 47.05 |
| 2 | 0.781 | 52.95 |

5971970

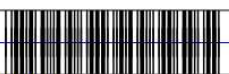

DAD1 A, Sig=215,10 Ref=off (D:\DATE\07\_01\06\_28\_43-44\SAMPL090.D)

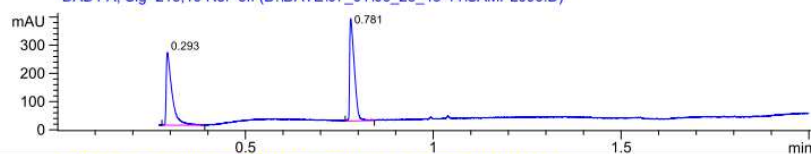

DAD1 B, Sig=254,10 Ref=off (D:\DATE\07\_01\06\_28\_43-44\SAMPL090.D)

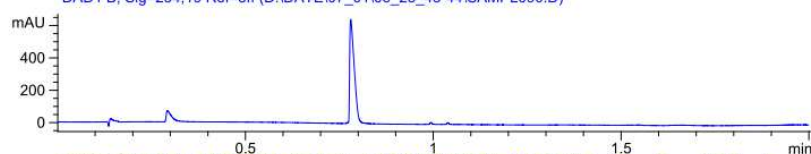

MSD1 TIC, MS File (D:\DATE\07\_01\06\_28\_43-44\SAMPL090.D) MM-APCI, Fast Scan, Frag: 120, "pos"

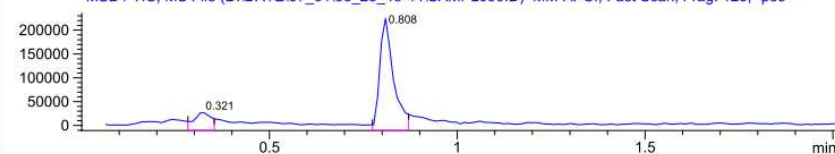

MSD2 TIC, MS File (D:\DATE\07\_01\06\_28\_43-44\SAMPL090.D) MM-APCI, Fast Scan, Frag: 120, "neg"

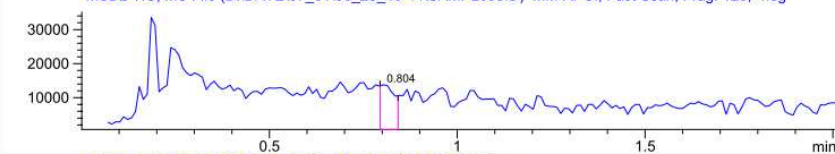

ADC1 A, ELSD (D:\DATE\07\_01\06\_28\_43-44\SAMPL090.D)

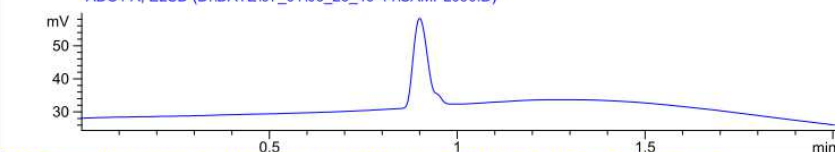

\*MSD1 SPC, time=0.316 of D:\DATE\07\_01\06\_28\_43-44\SAMPL090.D MM-APCI, Fast Scan, Frag: 120, "pos"

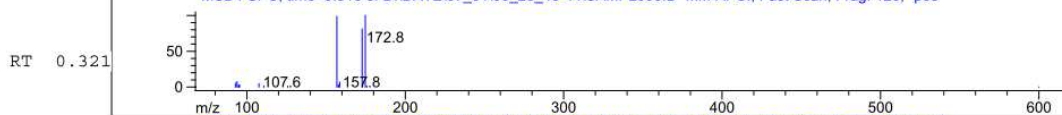

\*MSD1 SPC, time=0.809 of D:\DATE\07\_01\06\_28\_43-44\SAMPL090.D MM-APCI, Fast Scan, Frag: 120, "pos"

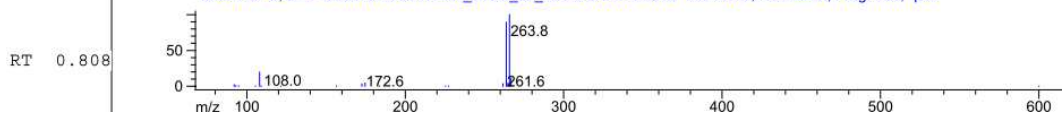

**Figure S26.** Entry 26, in Table 1: peaks were assigned to the starting amine (rt 0.29 min) and the product (rt 0.78 min).

MaxPeak: 91.56%  
Ret\_Time: 1.116 min

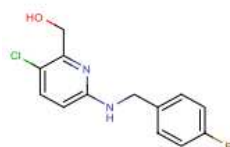

Mol Wt 266.7  
Exact Mass 266.08

| # | Time  | Area% |
|---|-------|-------|
| 1 | 0.731 | 3.74  |
| 2 | 1.116 | 91.56 |
| 3 | 1.345 | 4.71  |

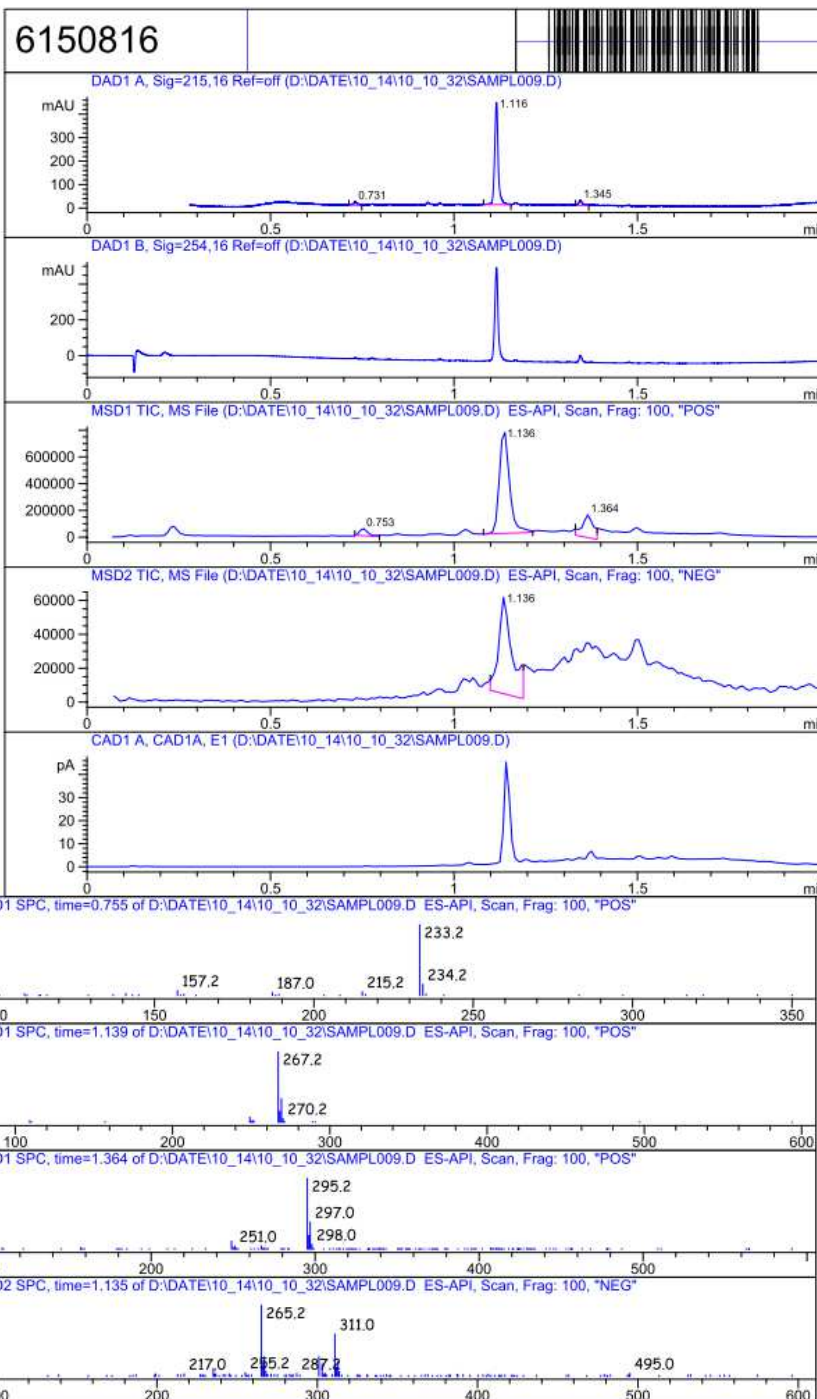

**Figure S27.** Entry 27, in Table 1: peak was assigned to the product (rt 1.12 min).

MaxPeak: 56.37%  
Ret\_Time: 1.103 min

6150814

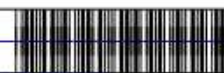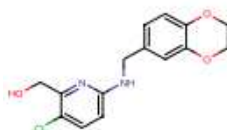

Mol Wt 306.74  
Exact Mass 306.09

| # | Time  | Area% |
|---|-------|-------|
| 1 | 0.394 | 7.63  |
| 2 | 0.688 | 3.15  |
| 3 | 1.030 | 32.85 |
| 4 | 1.103 | 56.37 |

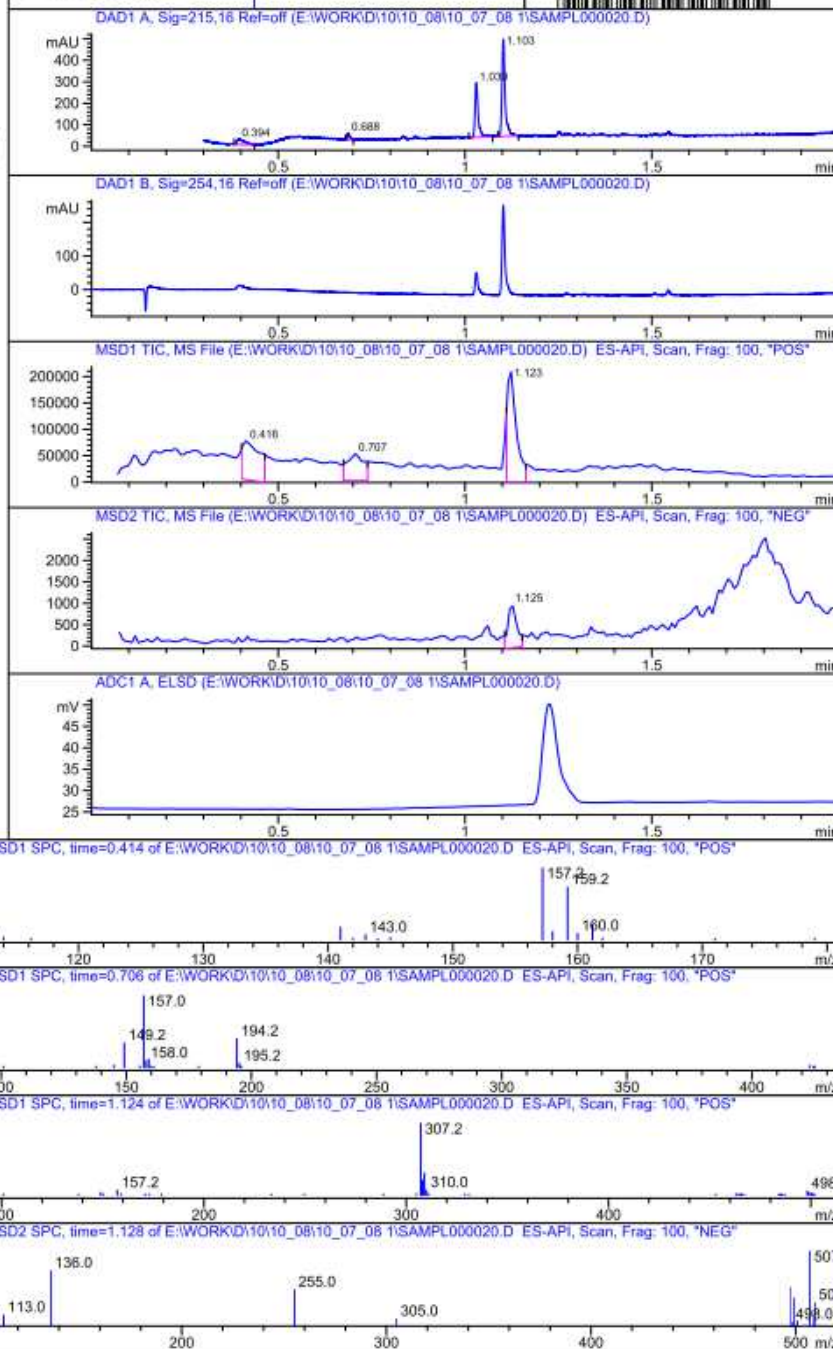

**Figure S28.** Entry 28, in Table 1: peaks were assigned to the aldehyde (rt 1.03 min) and the product (rt 1.1 min).

MaxPeak: 100.00%  
Ret\_Time: 0.777 min

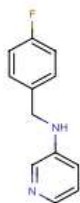

Mol Wt 202.23  
Exact Mass 202.11

| # | Time  | Area%  |
|---|-------|--------|
| 1 | 0.777 | 100.00 |

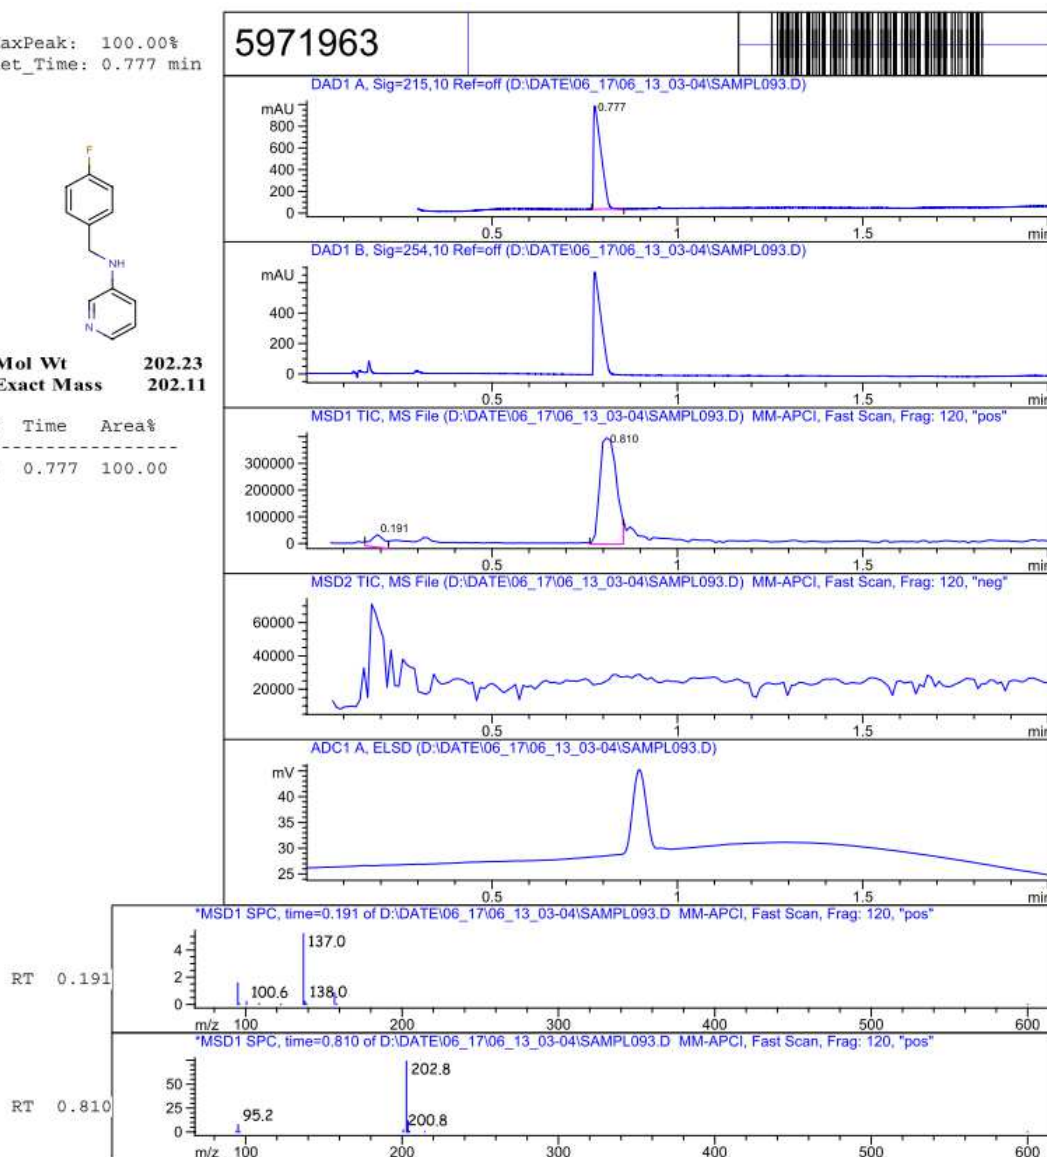

**Figure S29.** Entry 29, in Table 1: peak was assigned to the product (rt 0.78 min).

MaxPeak: 94.78%  
Ret\_Time: 0.825 min

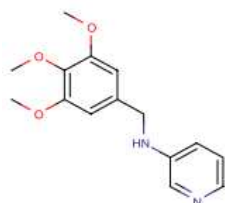

Mol Wt 274.32  
Exact Mass 274.15

| # | Time  | Area% |
|---|-------|-------|
| 1 | 0.730 | 2.01  |
| 2 | 0.825 | 94.78 |
| 3 | 1.082 | 3.22  |

5971962

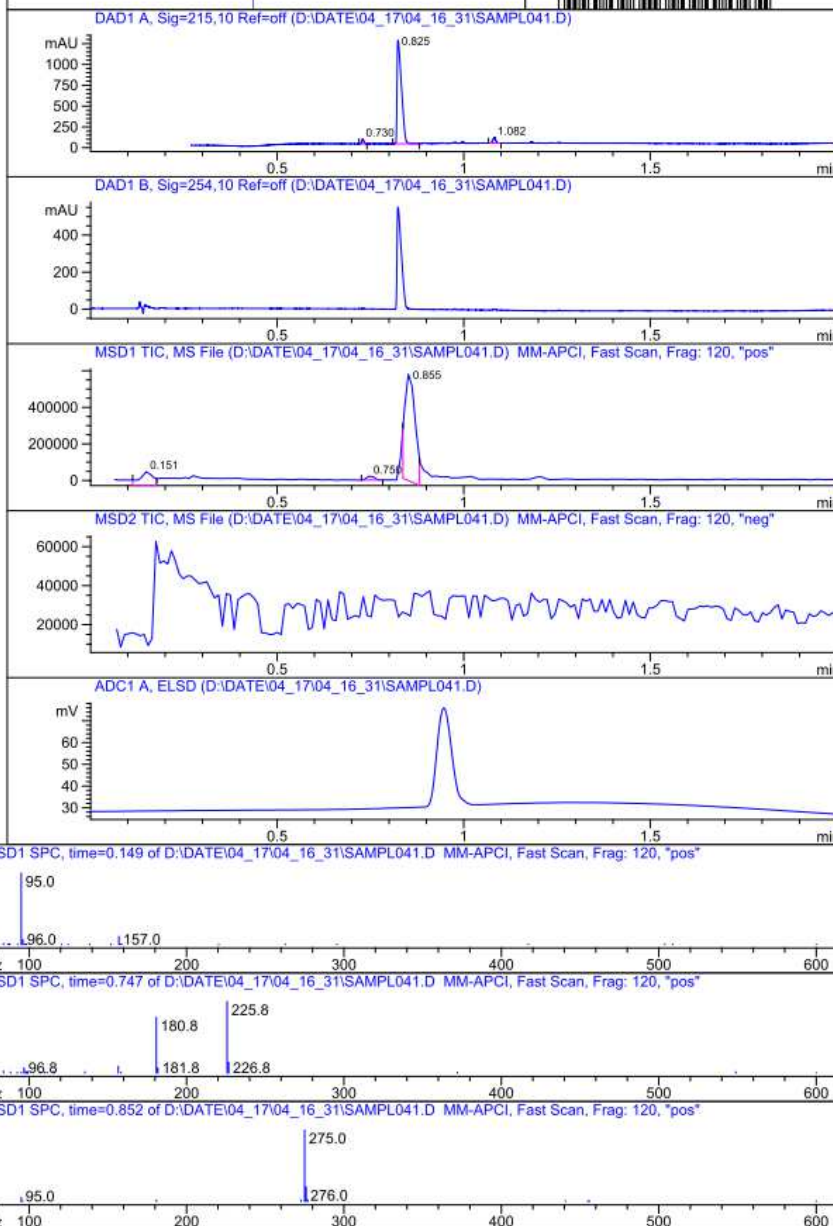

**Figure S30.** Entry 30, in Table 1: peaks were assigned to the product (rt 0.83 min) and the aldehyde (rt 1.08 min).



MaxPeak: 81.49%  
Ret\_Time: 0.859 min

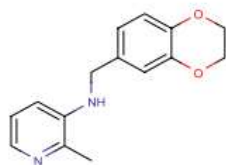

Mol Wt 256.3  
Exact Mass 256.14

| # | Time  | Area% |
|---|-------|-------|
| 1 | 0.859 | 81.49 |
| 2 | 0.902 | 3.33  |
| 3 | 0.969 | 13.21 |
| 4 | 1.162 | 1.97  |

6150479

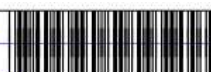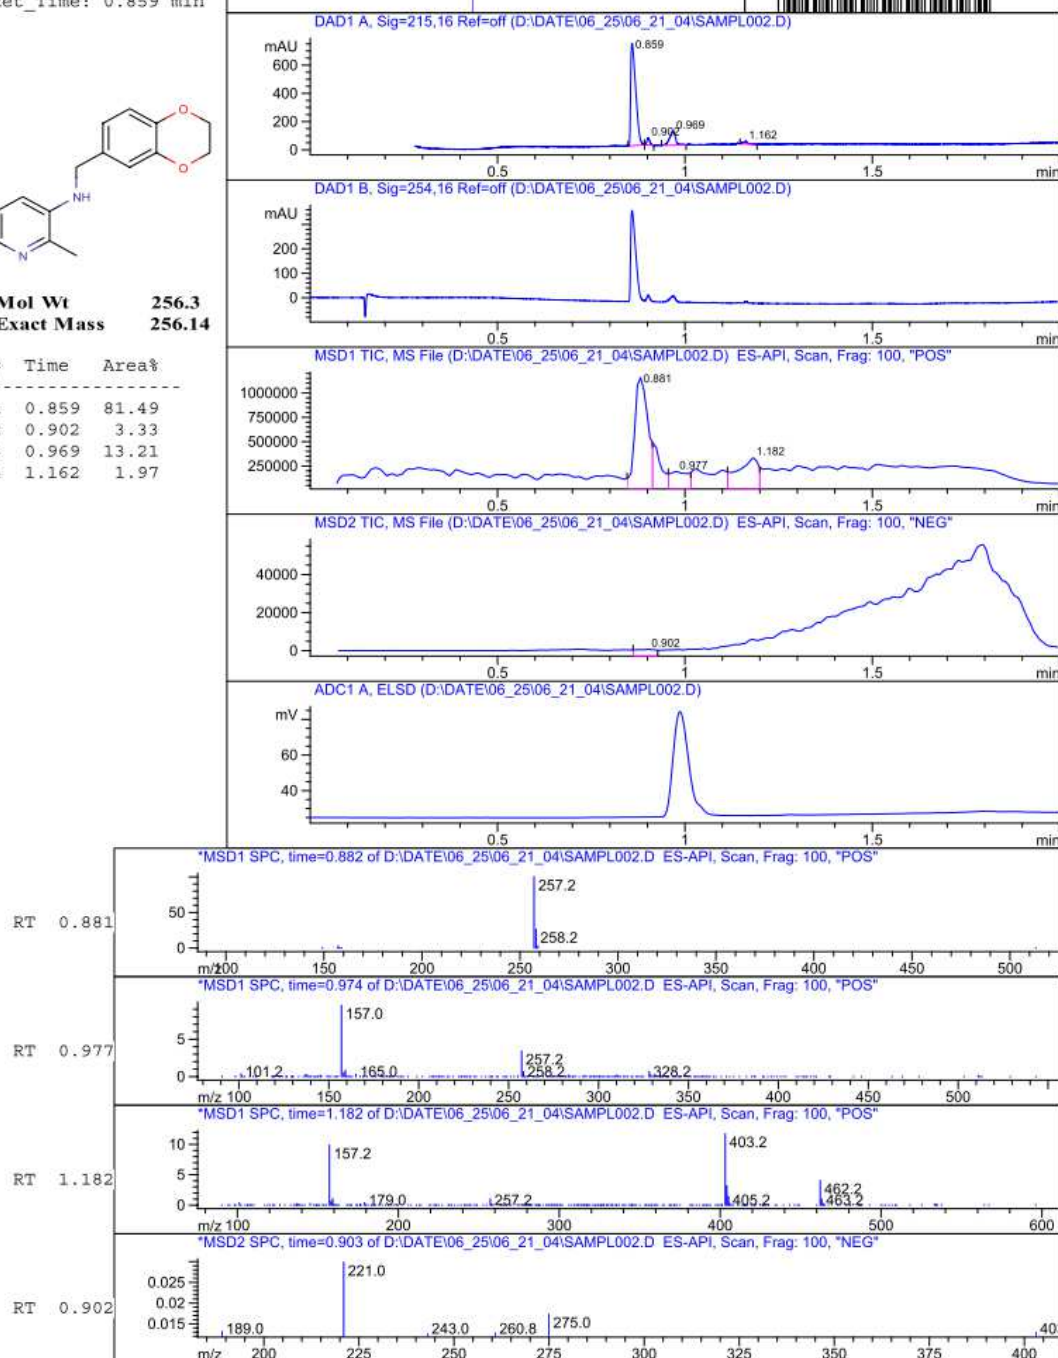

**Figure S31.** Entry 31, in Table 1: peaks were assigned to the product (rt 0.86 min), the aldehyde (rt 0.97 min), and the tertiary amine (rt 1.16 min).

MaxPeak: 81.83%  
Ret\_Time: 0.825 min

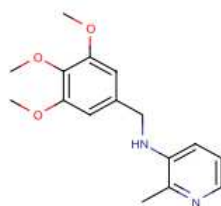

Mol Wt 288.34  
Exact Mass 288.17

| # | Time  | Area% |
|---|-------|-------|
| 1 | 0.825 | 81.83 |
| 2 | 1.040 | 17.41 |
| 3 | 1.097 | 0.76  |

6150480

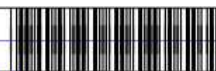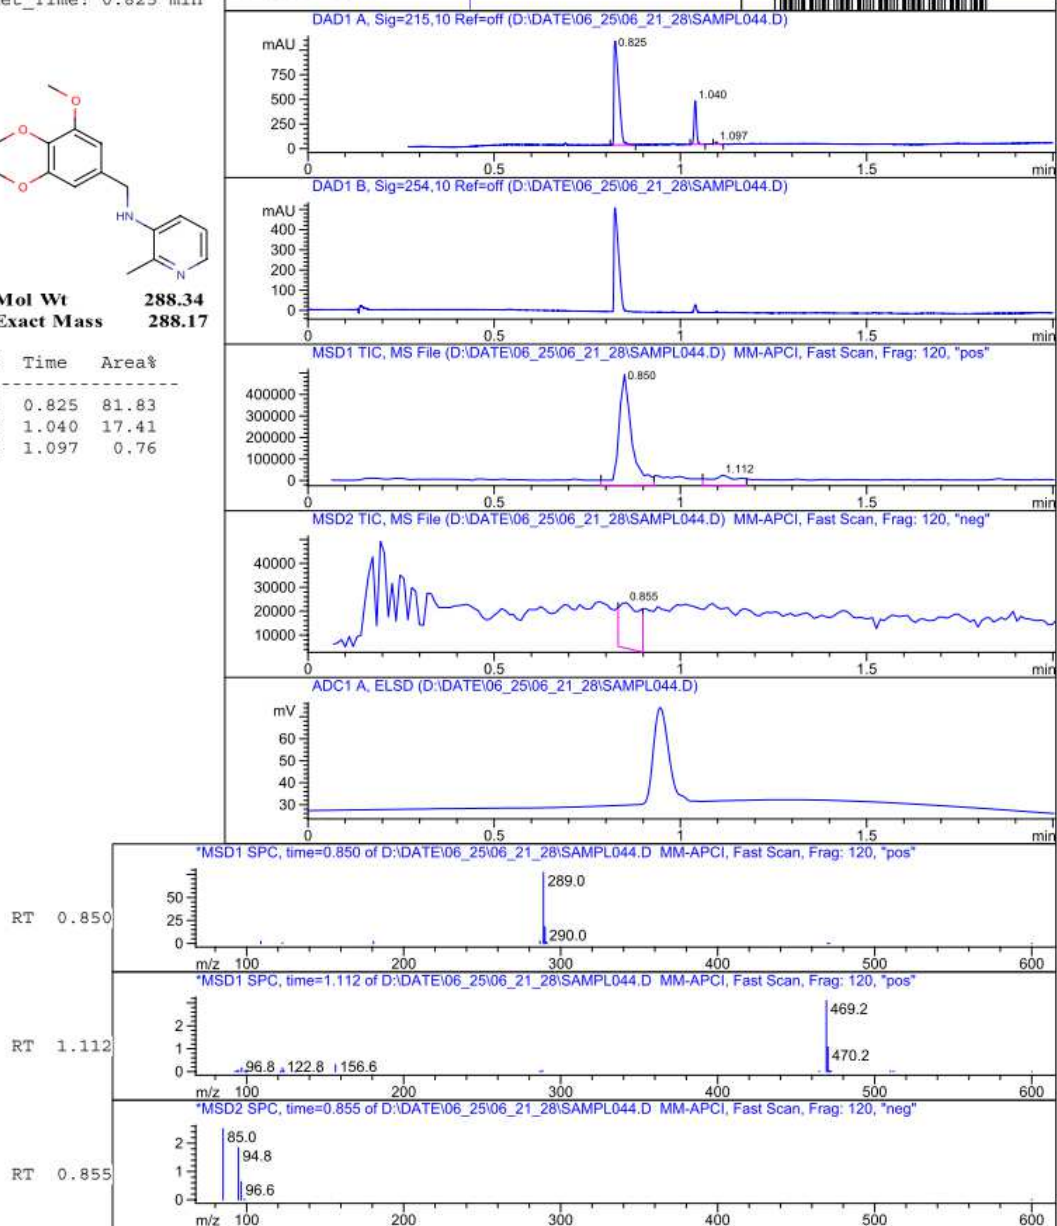

**Figure S32.** Entry 32, in Table 1: peaks were assigned to the product (rt 0.83 min), the aldehyde (rt 1.04 min), and the tertiary amine (rt 1.1 min).

MaxPeak: 100.00%  
Ret\_Time: 1.016 min

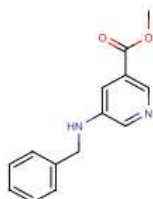

Mol Wt 242.27  
Exact Mass 242.12

| # | Time  | Area%  |
|---|-------|--------|
| 1 | 1.016 | 100.00 |

6150732

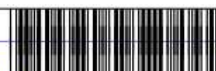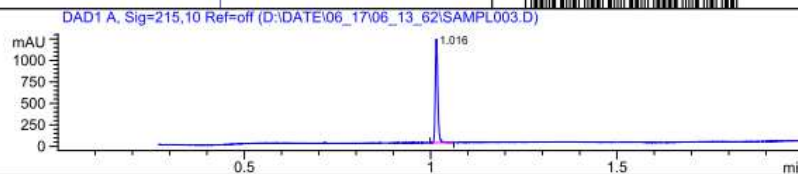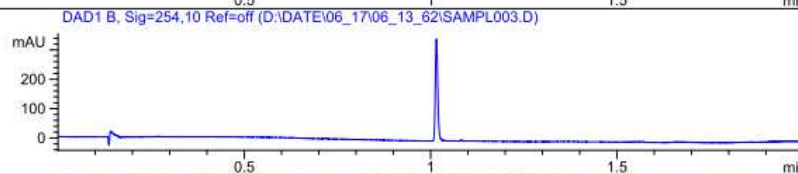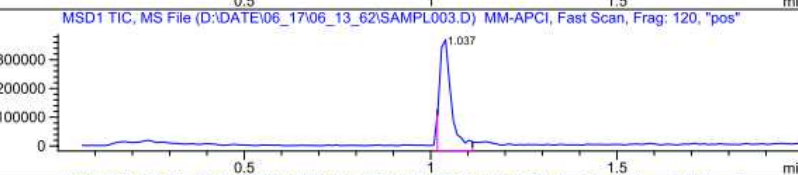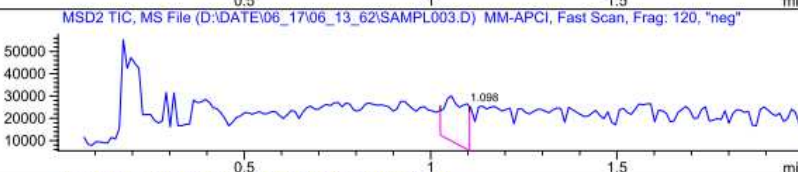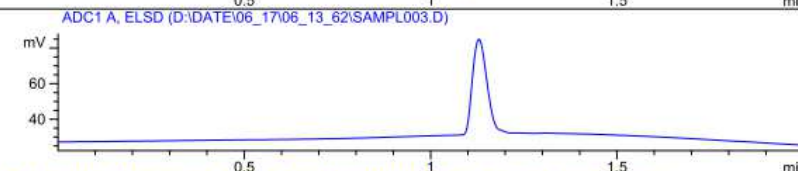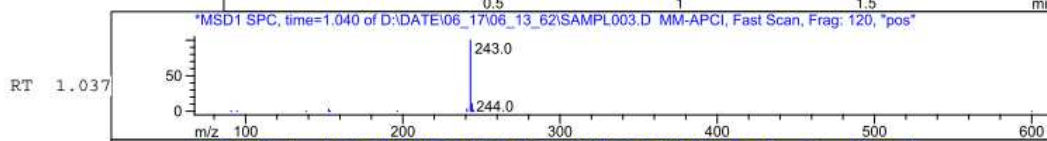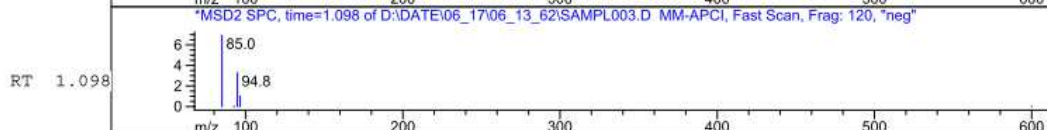

**Figure S33.** Entry 33, in Table 1: peak was assigned to the product (rt 1.02 min).



MaxPeak: 71.80%  
Ret\_Time: 1.043 min

6150733

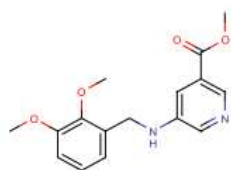

Mol Wt 302.32  
Exact Mass 302.14

| # | Time  | Area% |
|---|-------|-------|
| 1 | 1.043 | 71.80 |
| 2 | 1.069 | 28.20 |

RT 0.286

RT 1.066

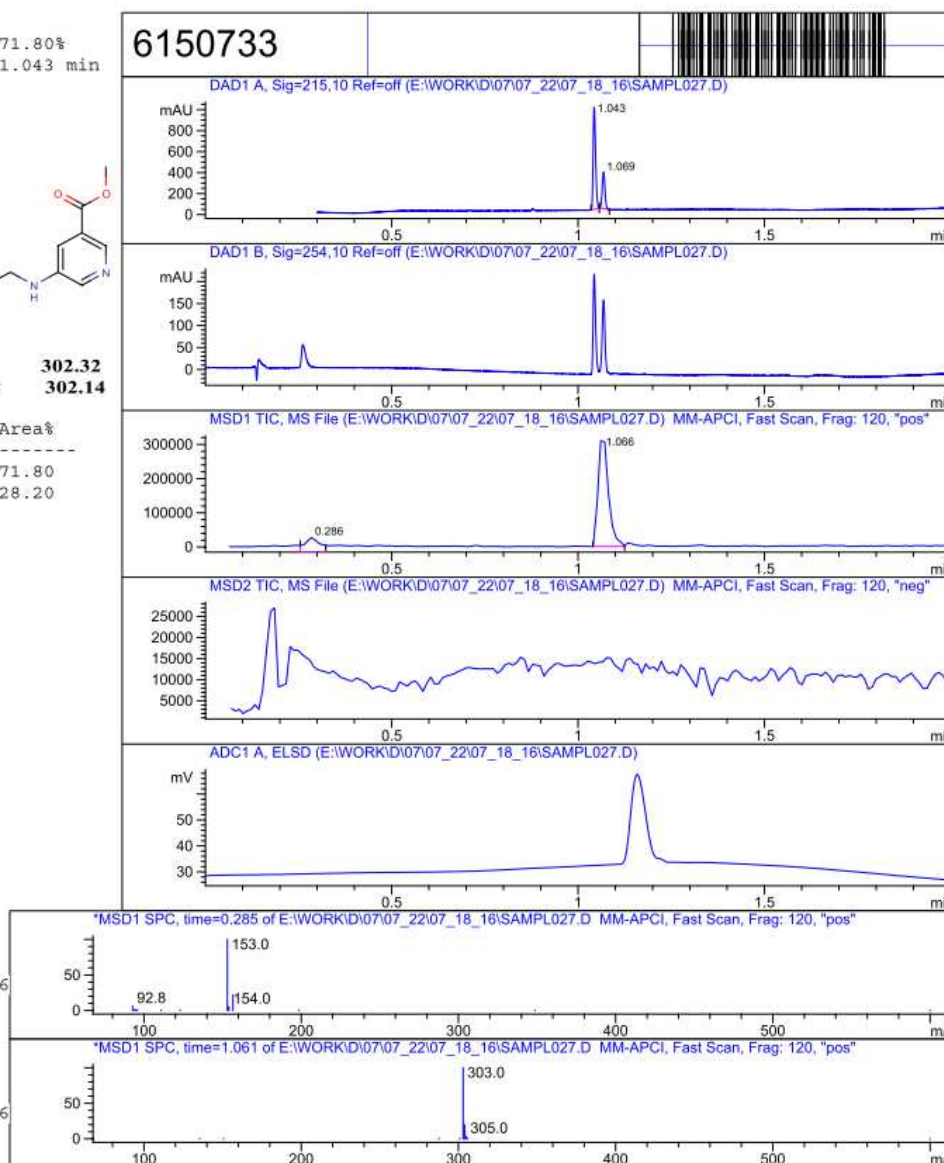

**Figure S34.** Entry 34, in Table 1: peaks were assigned to the starting amine (rt 0.26 min), the product (rt 1.04 min), and the aldehyde (rt 1.07 min).

MaxPeak: 90.23%  
Ret\_Time: 1.034 min

6150426

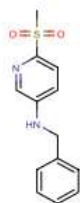

Mol Wt 262.33  
Exact Mass 262.09

| # | Time  | Area% |
|---|-------|-------|
| 1 | 0.453 | 9.77  |
| 2 | 1.034 | 90.23 |

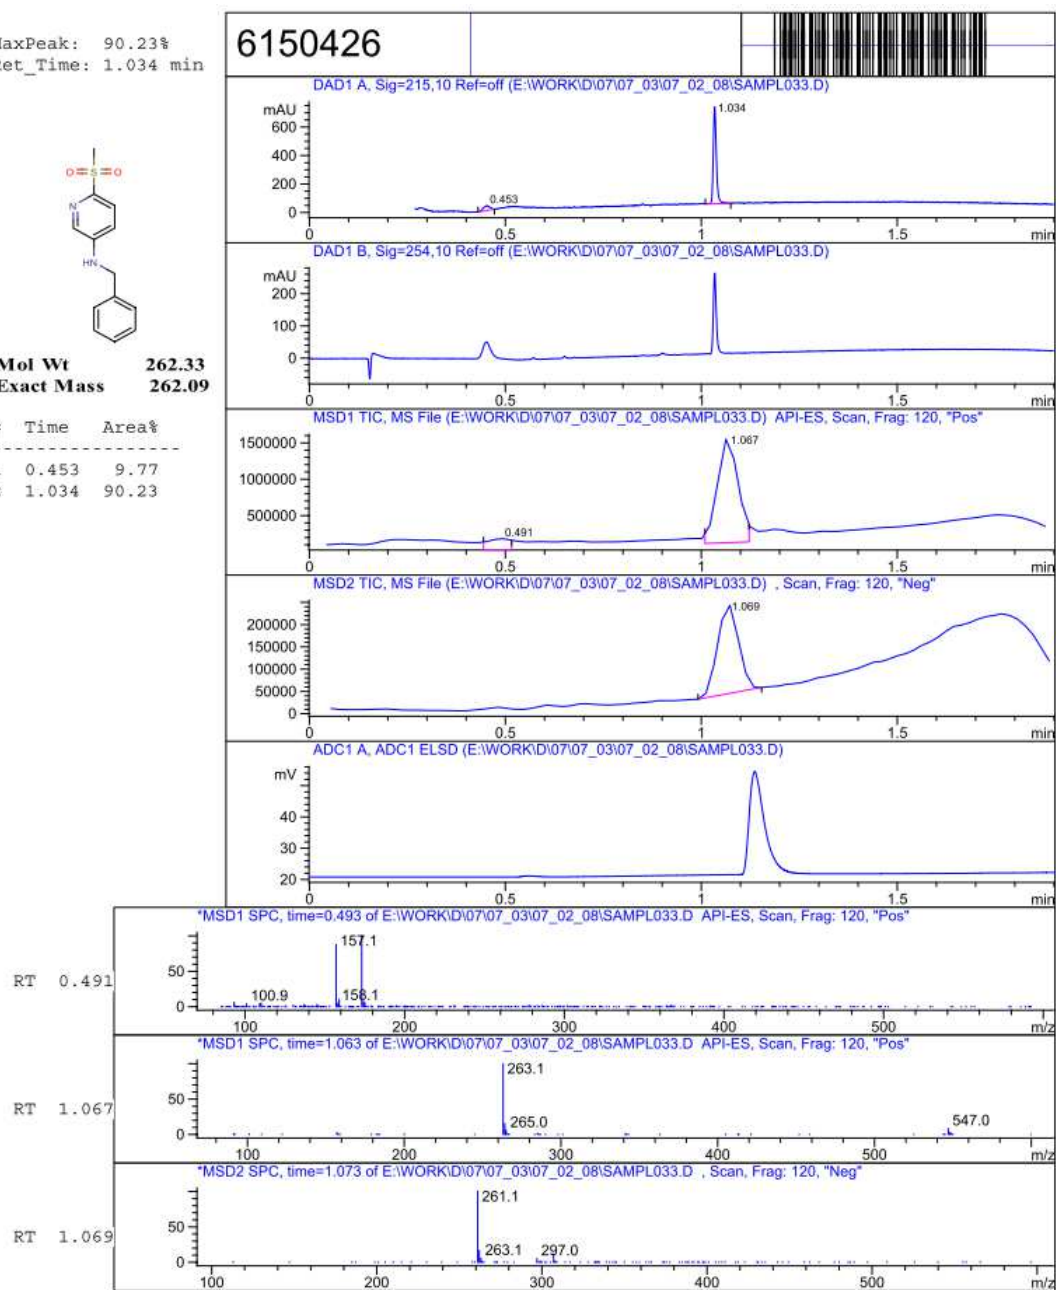

**Figure S35.** Entry 35, in Table 1: peaks were assigned to the starting amine (rt 0.45 min) and the product (rt 1.03 min).

MaxPeak: 75.52%  
Ret\_Time: 1.109 min

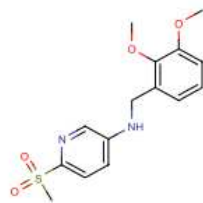

Mol Wt 322.38  
Exact Mass 322.11

| # | Time  | Area% |
|---|-------|-------|
| 1 | 0.341 | 4.86  |
| 2 | 0.704 | 1.44  |
| 3 | 0.885 | 3.20  |
| 4 | 1.080 | 14.98 |
| 5 | 1.109 | 75.52 |

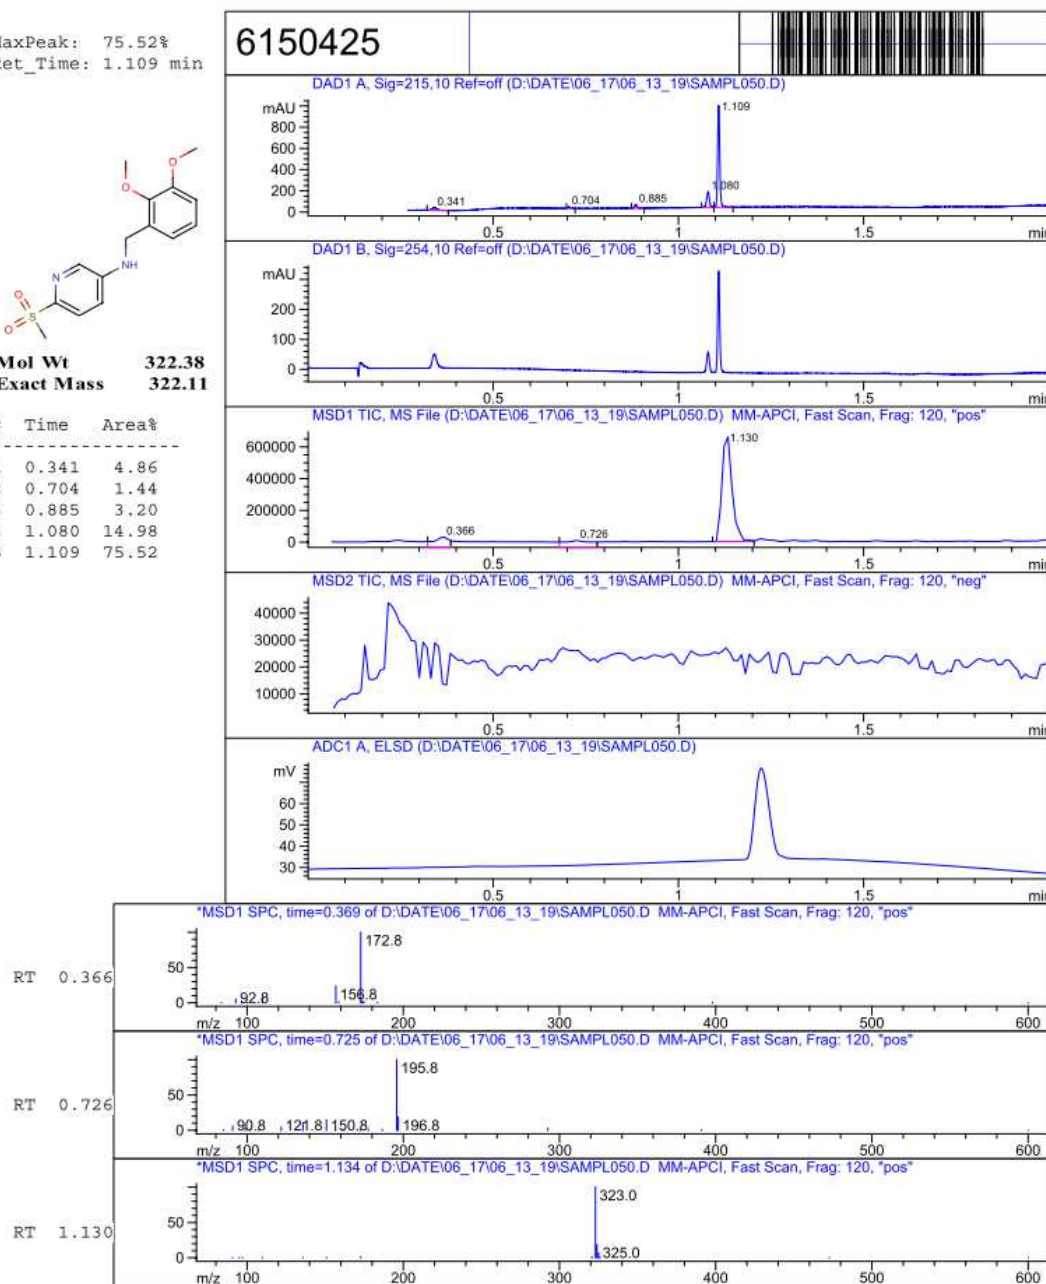

**Figure S36.** Entry 36, in Table 1: peaks were assigned to the starting amine (rt 0.34 min), the aldehyde (rt 1.08 min), and the product (rt 1.11 min).

MaxPeak: 79.93%  
Ret\_Time: 1.127 min

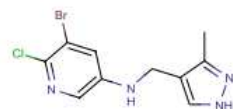

Mol Wt 301.57  
Exact Mass 301.99

| # | Time  | Area% |
|---|-------|-------|
| 1 | 1.000 | 15.07 |
| 2 | 1.043 | 4.99  |
| 3 | 1.127 | 79.93 |

6150738

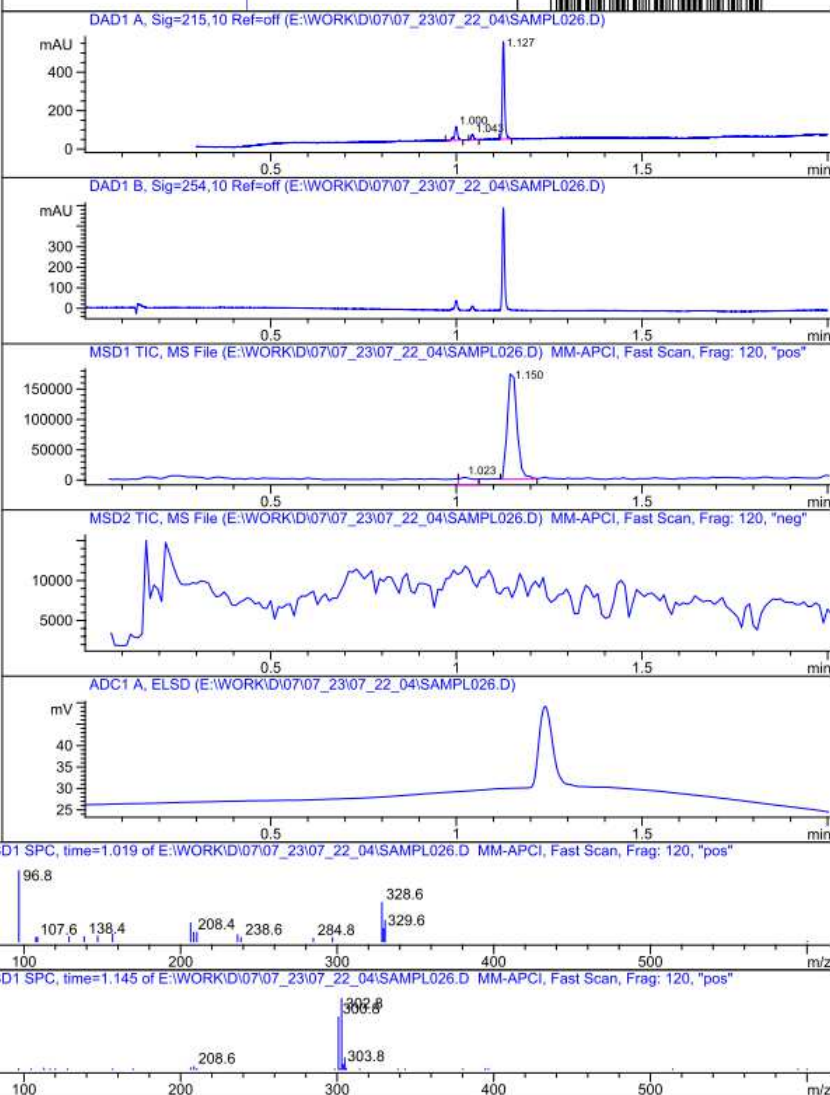

**Figure S37.** Entry 37, in Table 1: peaks were assigned to the side product (rt 1.00 min) and the product (rt 1.13 min).

Possible structure of the side product

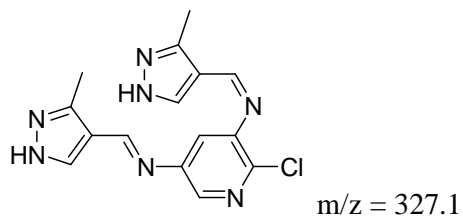

MaxPeak: 77.86%  
Ret\_Time: 0.901 min

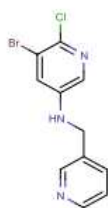

Mol Wt 298.57  
Exact Mass 298.98

| # | Time  | Area% |
|---|-------|-------|
| 1 | 0.901 | 77.86 |
| 2 | 0.988 | 22.14 |

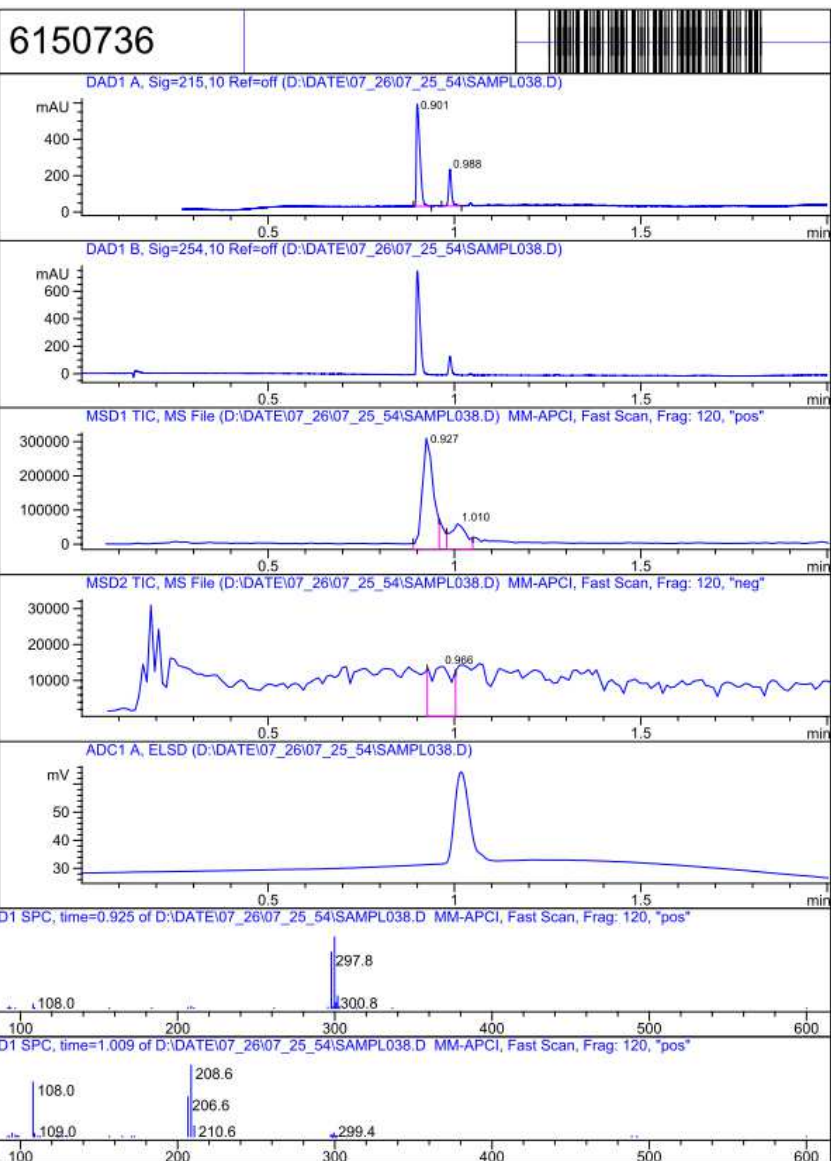

**Figure S38.** Entry 38, in Table 1: peaks were assigned to the product (rt 0.90 min) and the starting amine (rt 0.99 min).



MaxPeak: 46.42%  
Ret\_Time: 1.164 min

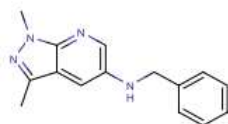

Mol Wt 252.31  
Exact Mass 252.16

| # | Time  | Area% |
|---|-------|-------|
| 1 | 0.579 | 35.85 |
| 2 | 0.766 | 9.17  |
| 3 | 0.842 | 8.56  |
| 4 | 1.164 | 46.42 |

6150439

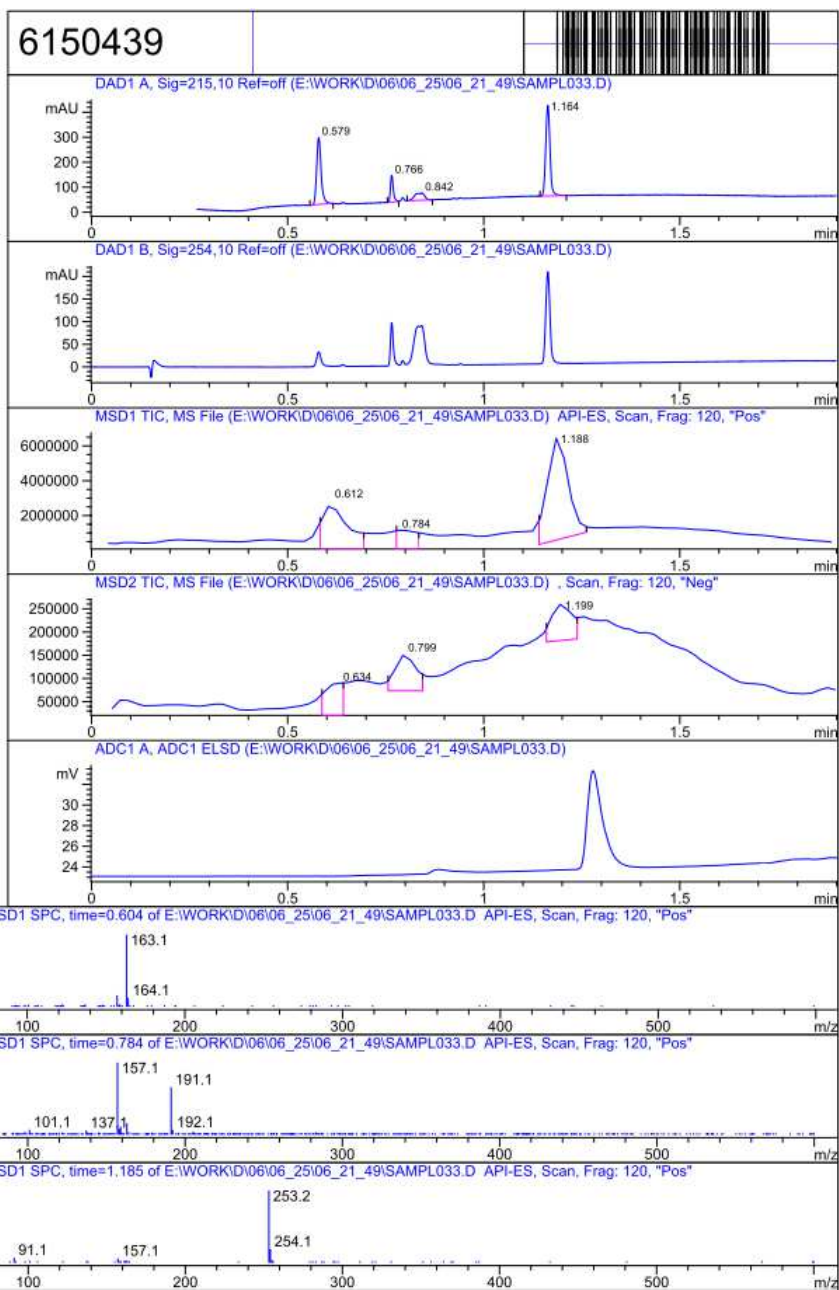

**Figure S39.** Entry 39, in Table 1: peaks were assigned to the starting amine (rt 0.61 min), the acylated starting amine (rt 0.77 min), the aldehyde (rt 0.84 min), and the product (rt 1.16 min).



MaxPeak: 44.41%  
Ret\_Time: 0.581 min

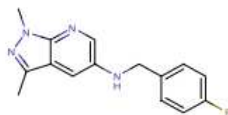

Mol Wt 270.3  
Exact Mass 270.15

| # | Time  | Area% |
|---|-------|-------|
| 1 | 0.581 | 44.41 |
| 2 | 0.766 | 4.30  |
| 3 | 0.878 | 18.31 |
| 4 | 1.185 | 32.98 |

6150436

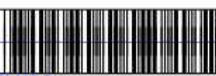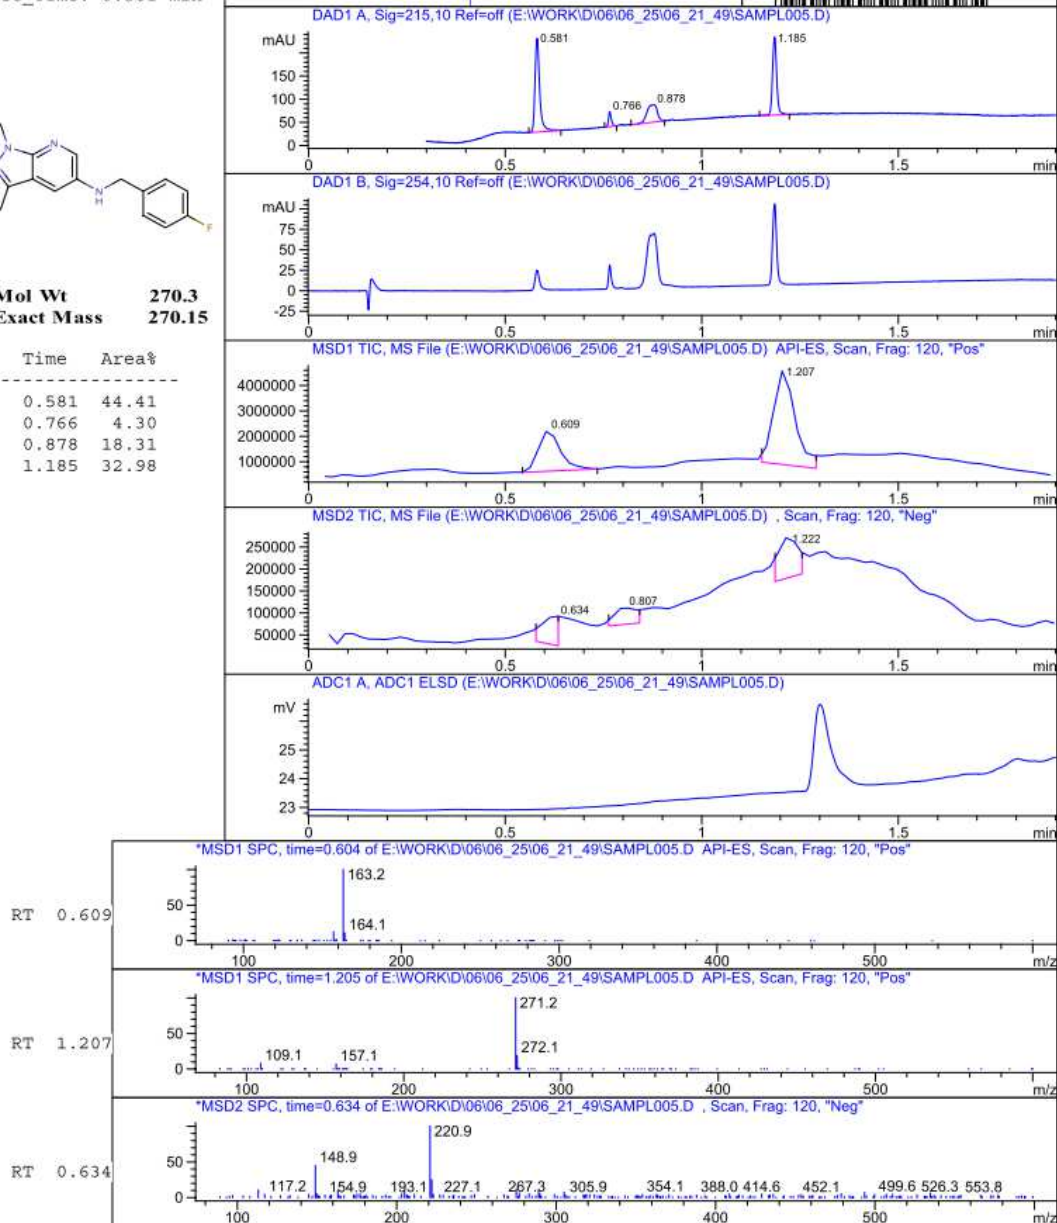

**Figure S40.** Entry 40, in Table 1: peaks were assigned to the starting amine (rt 0.58 min), the aldehyde (rt 0.88 min), and the product (rt 1.19g min).

# NMR spectra for the selected compounds

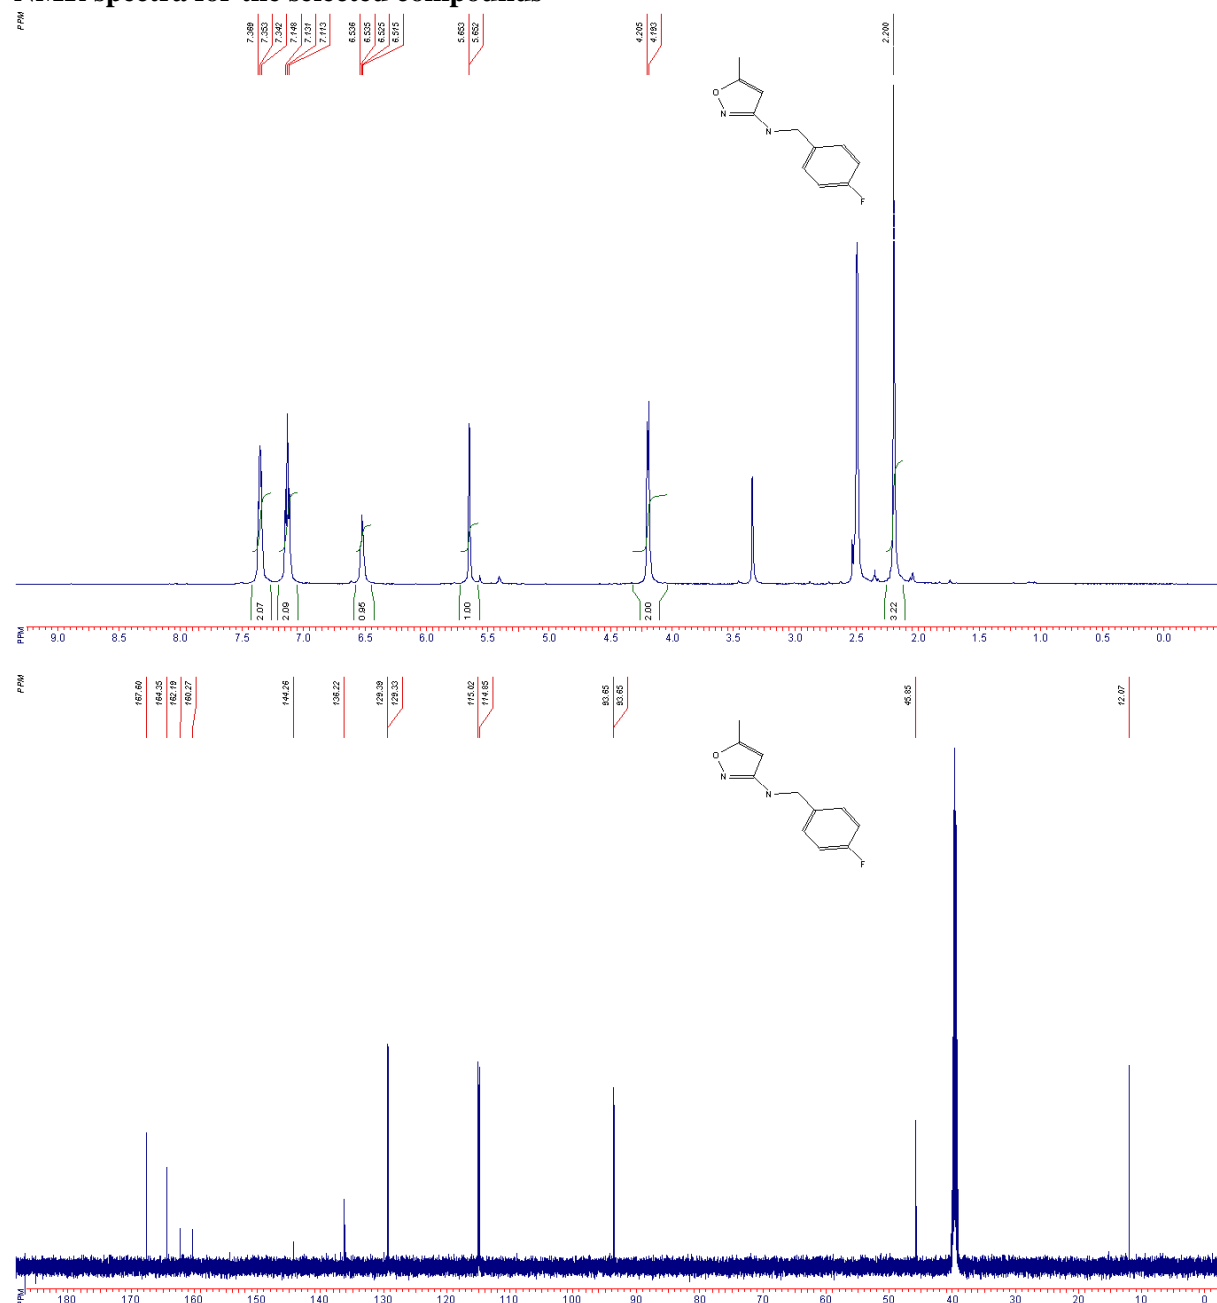

Entry 1, in Table 1

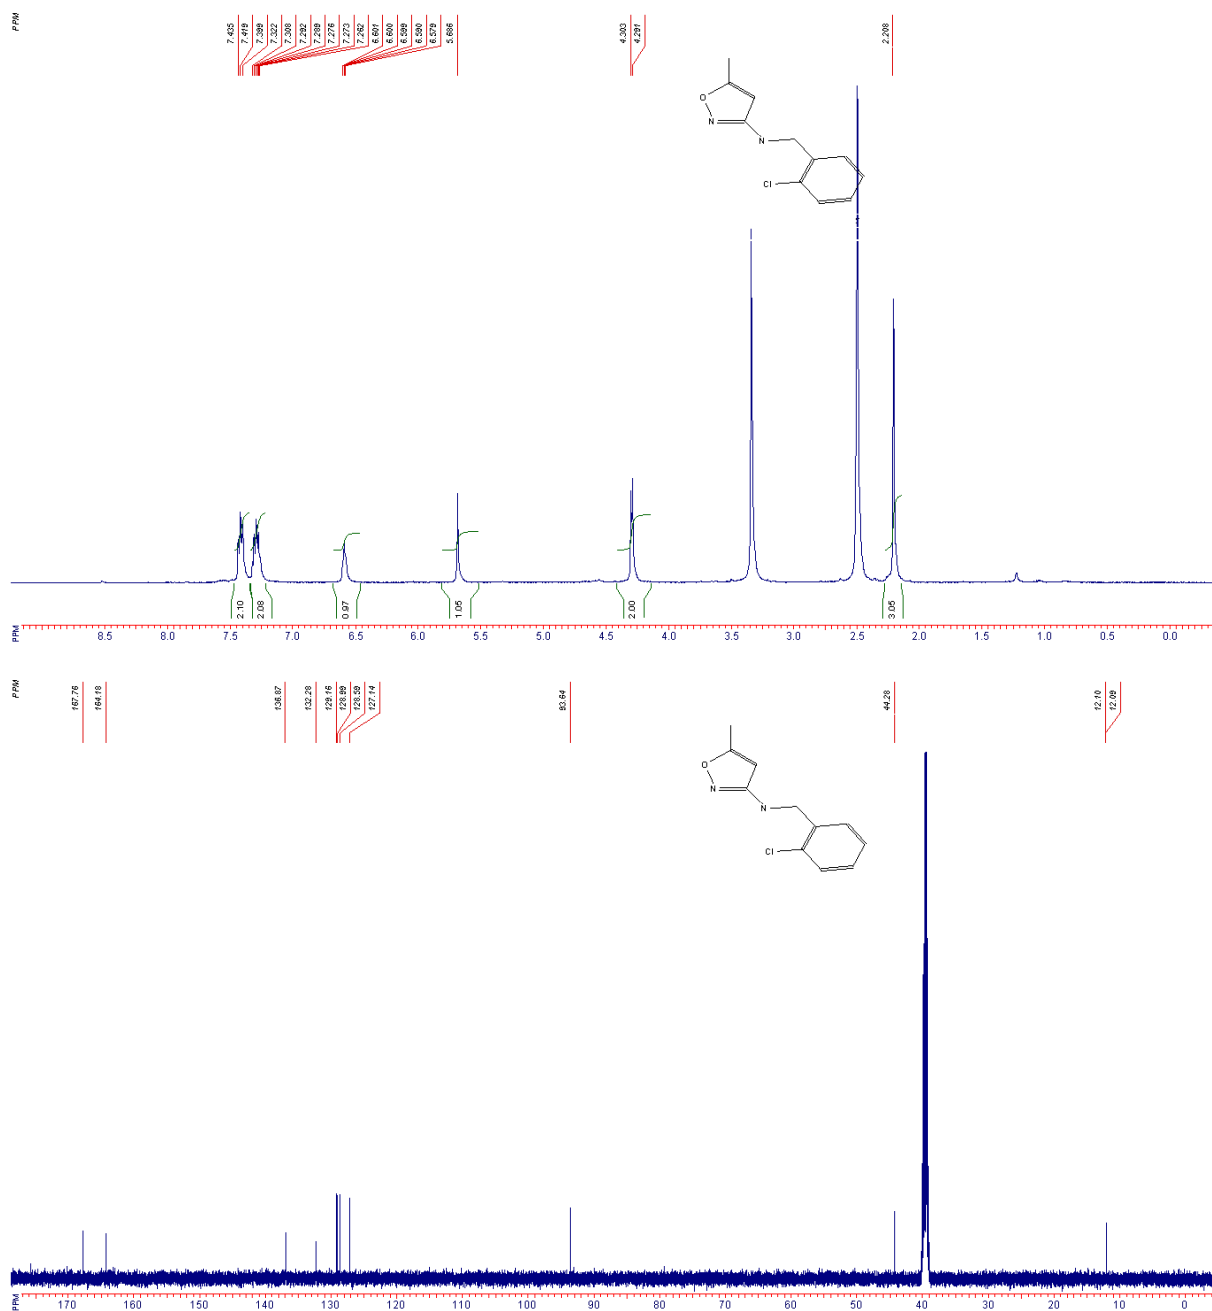

Entry 2, in Table 1

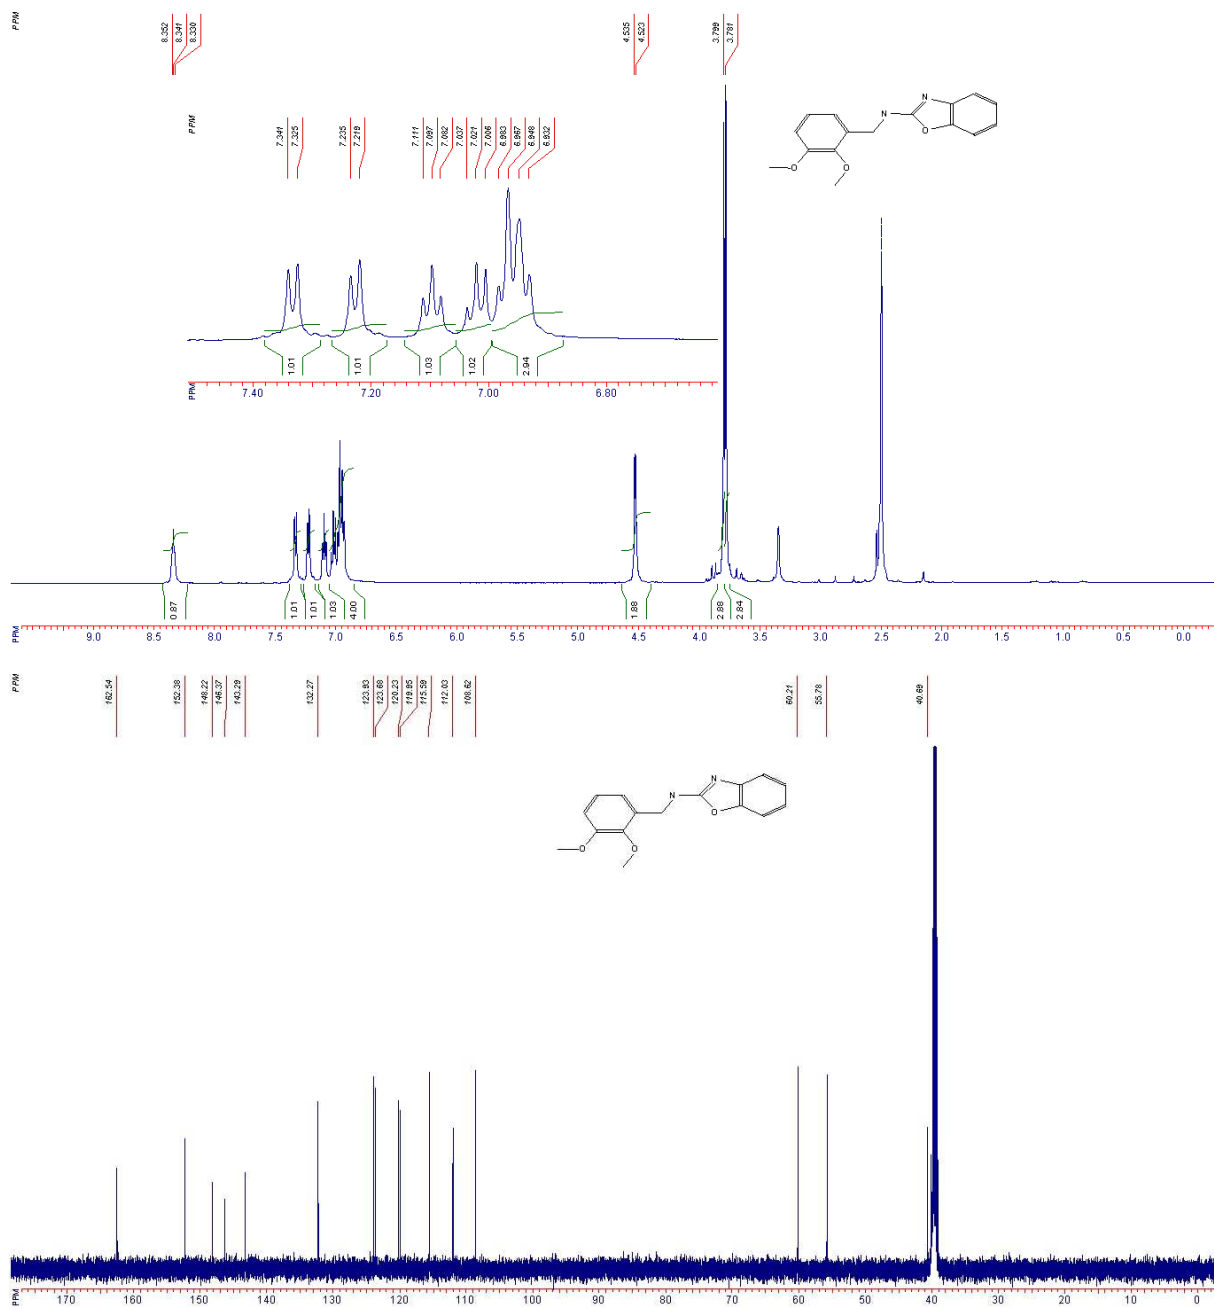

Entry 3, in Table 1

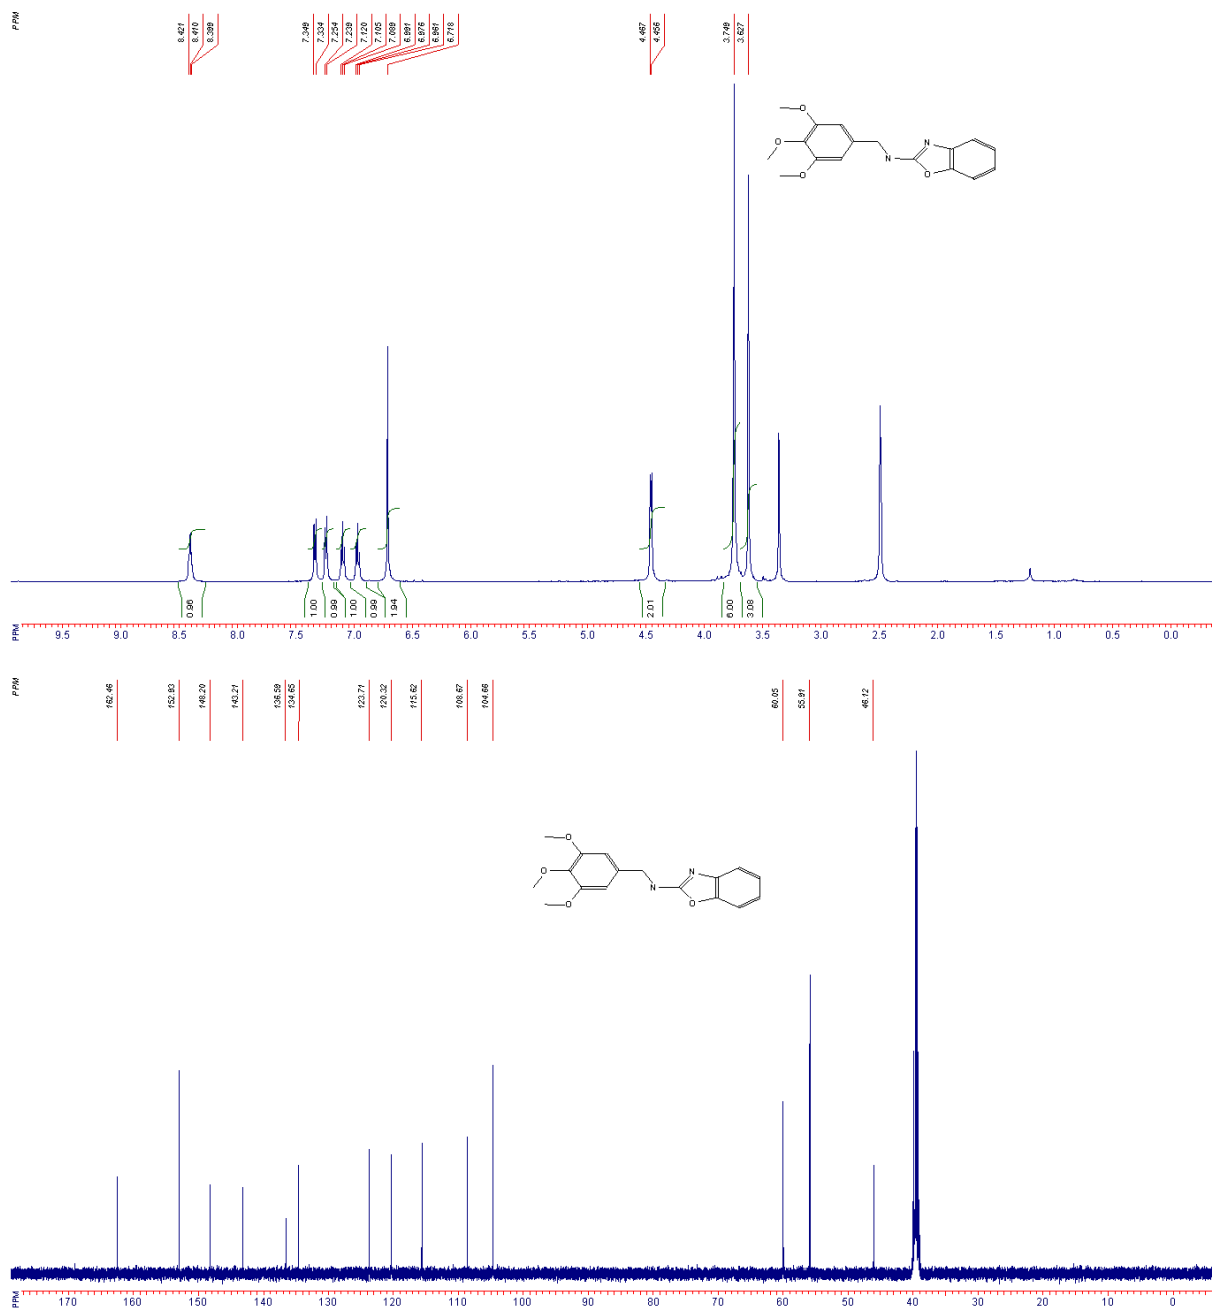

Entry 4, in Table 1

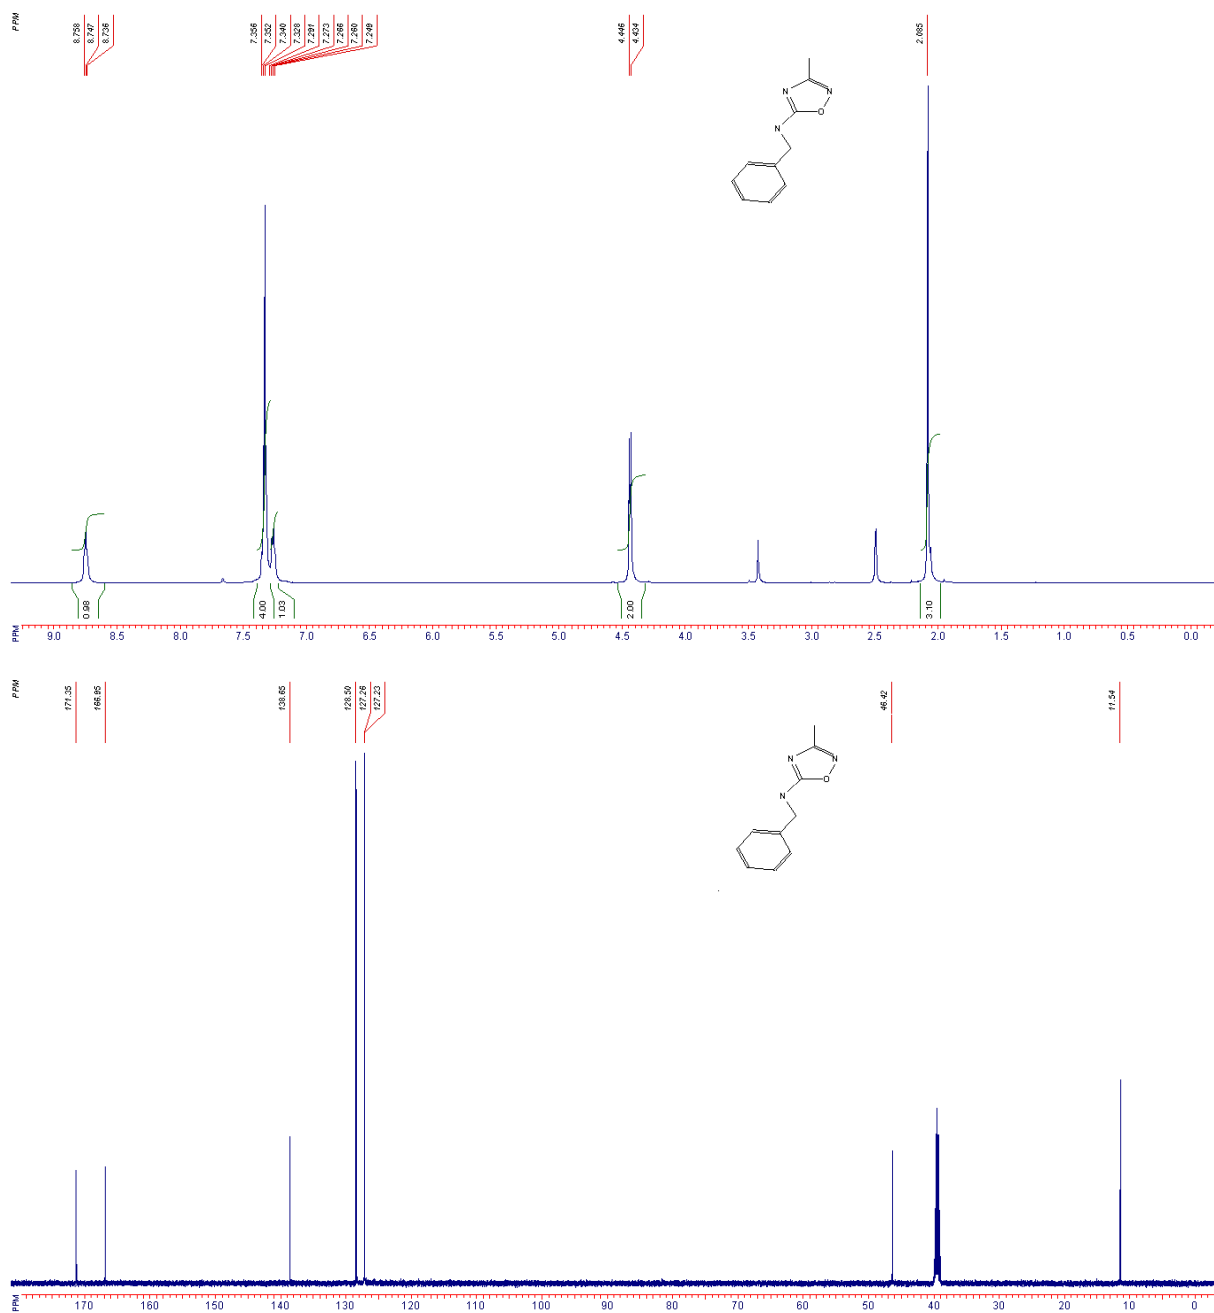

Entry 5, in Table 1



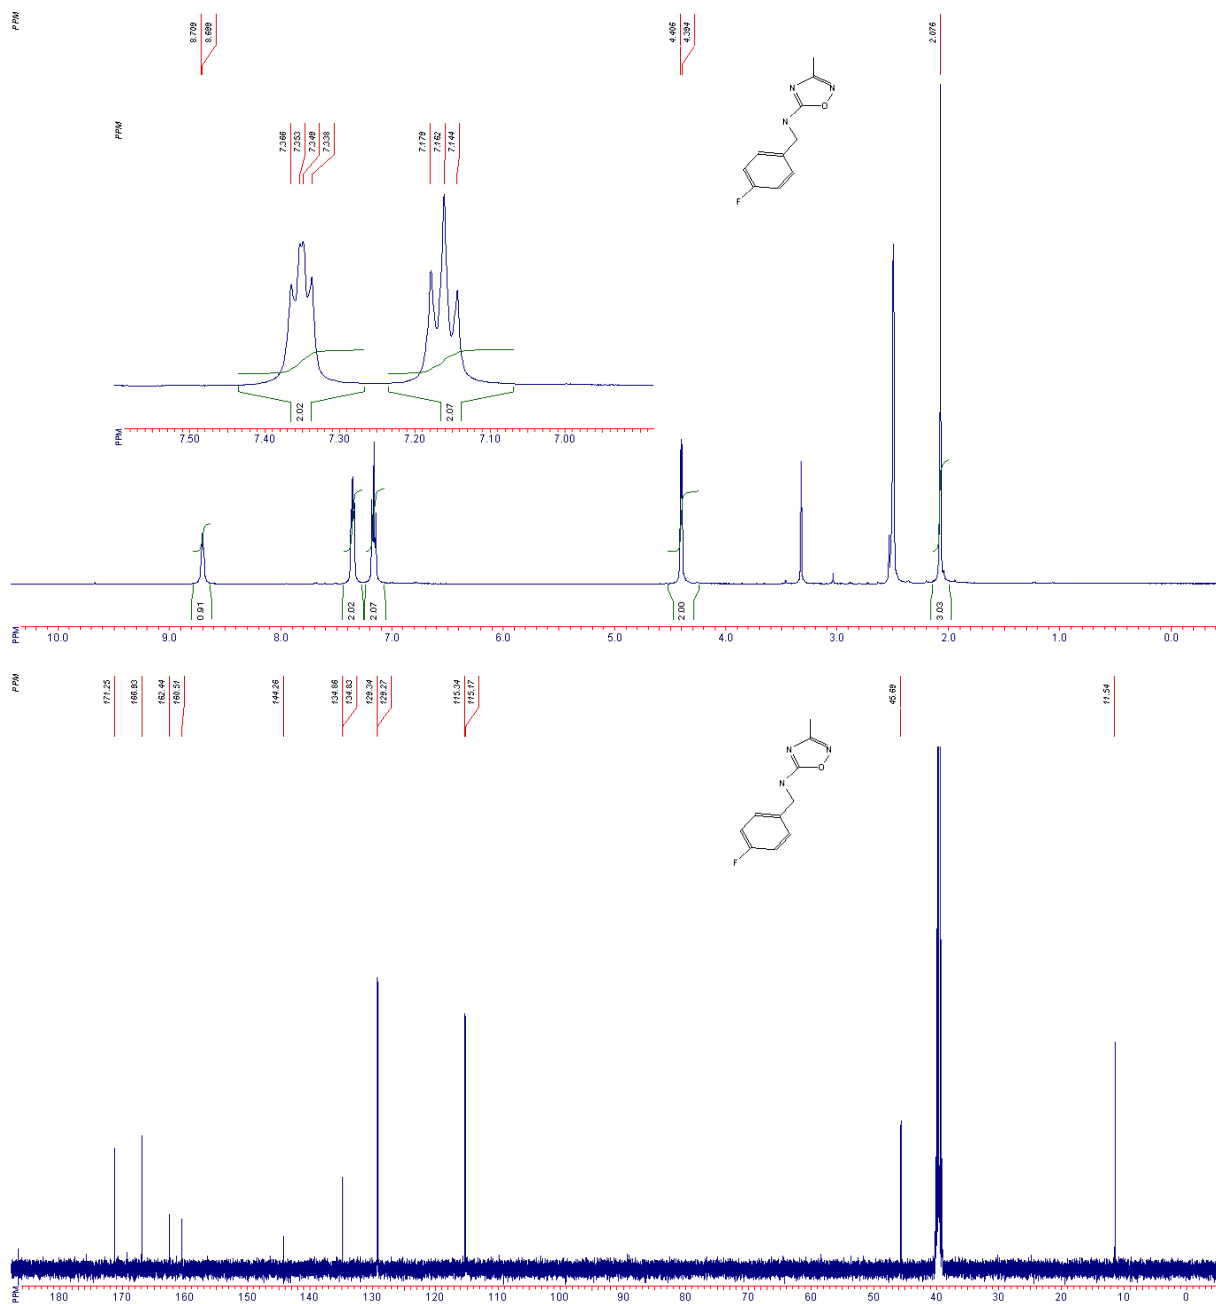

Entry 6, in Table 1

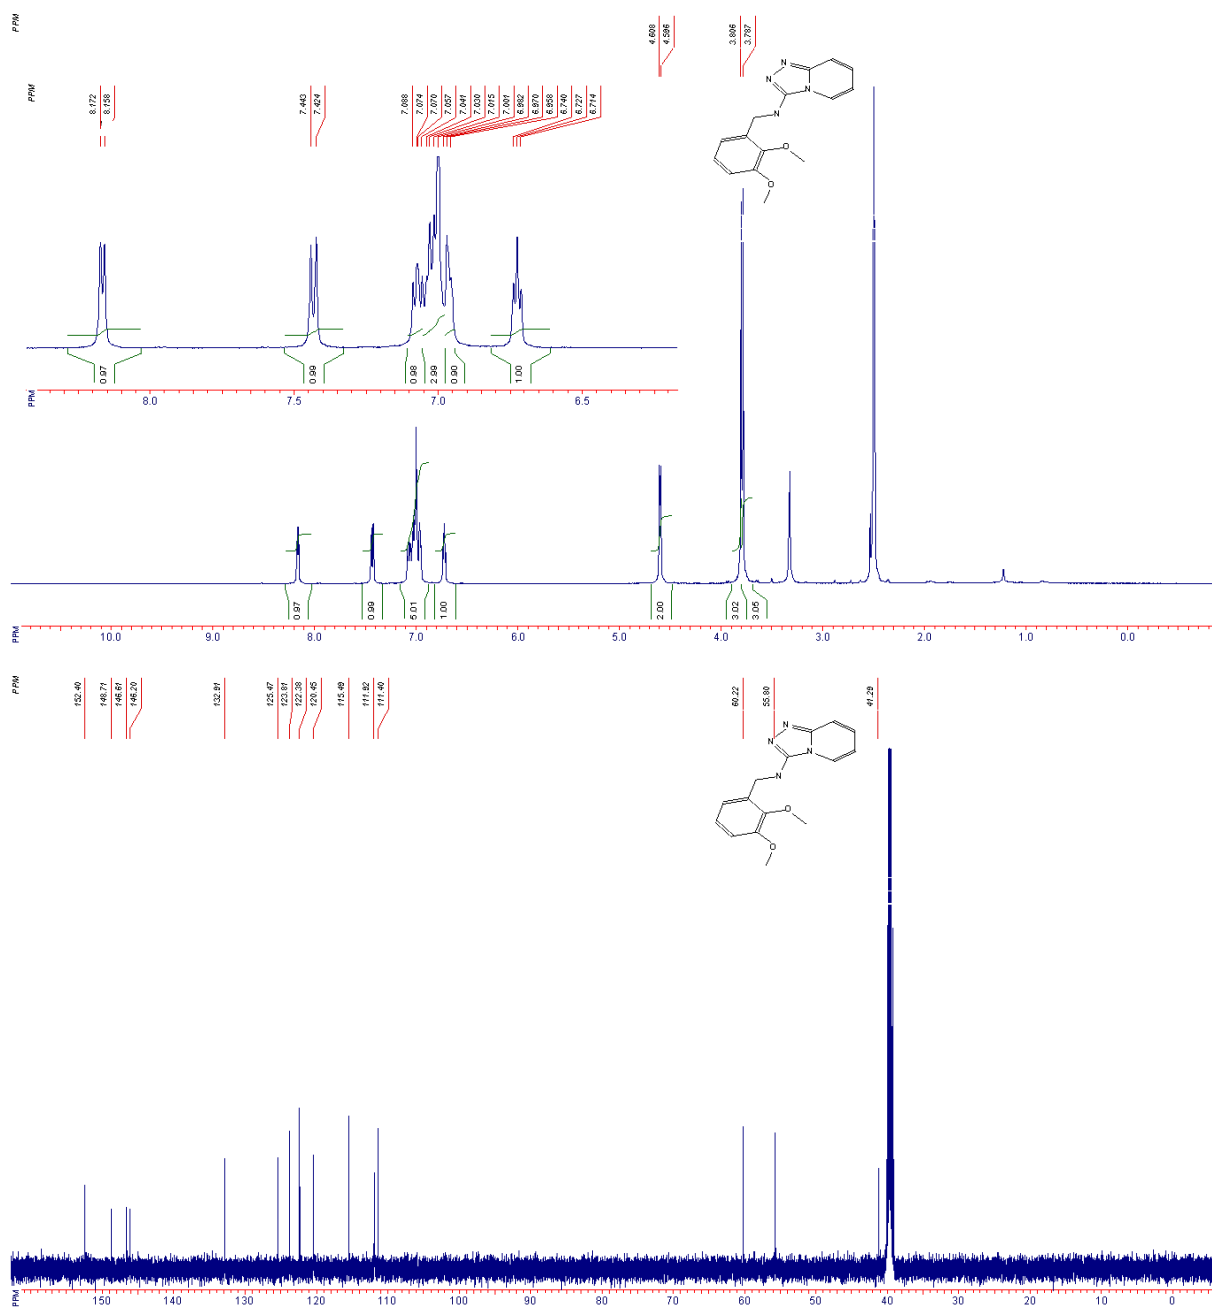

Entry 11, in Table 1

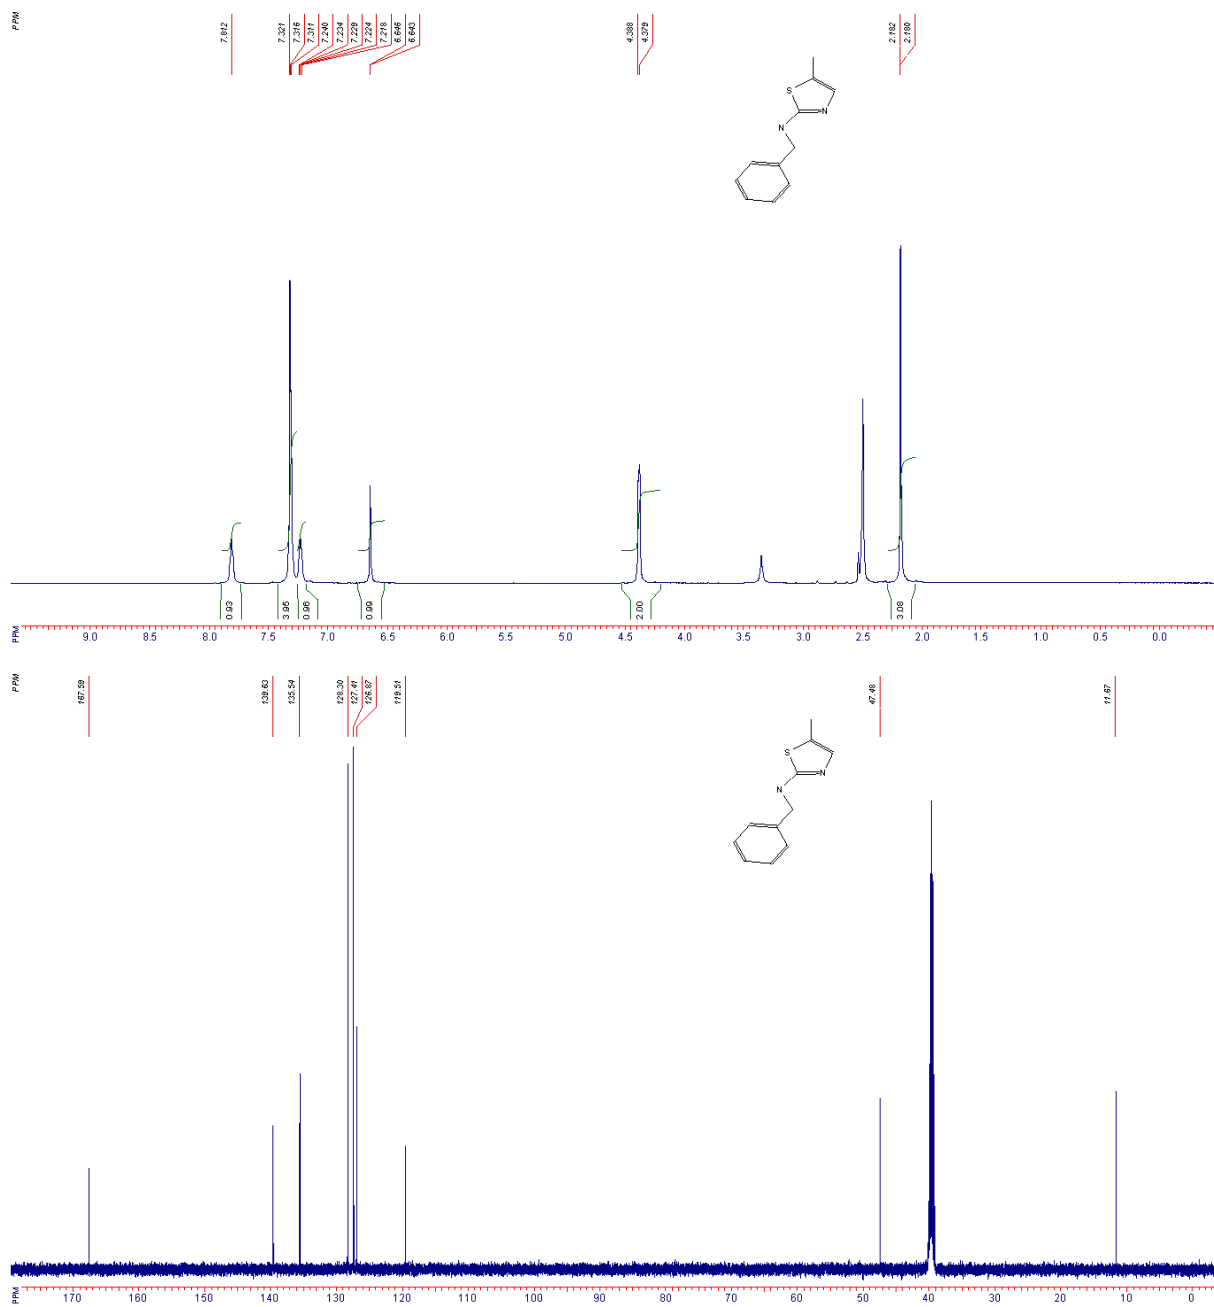

Entry 13, in Table 1

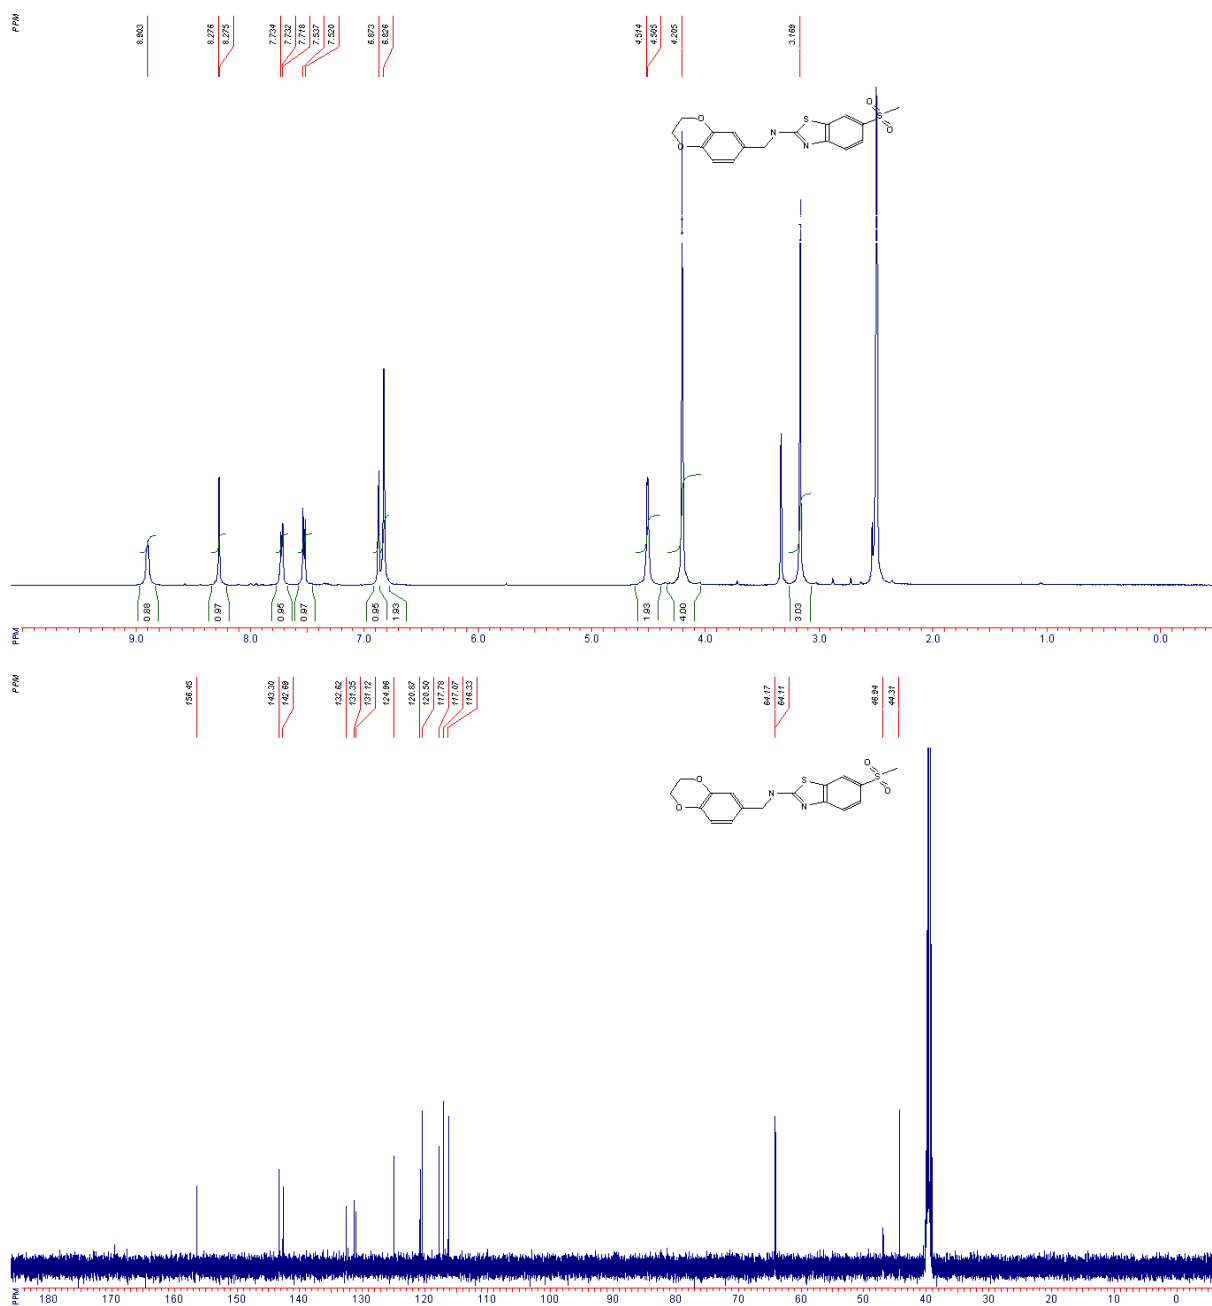

Entry 15, in Table 1

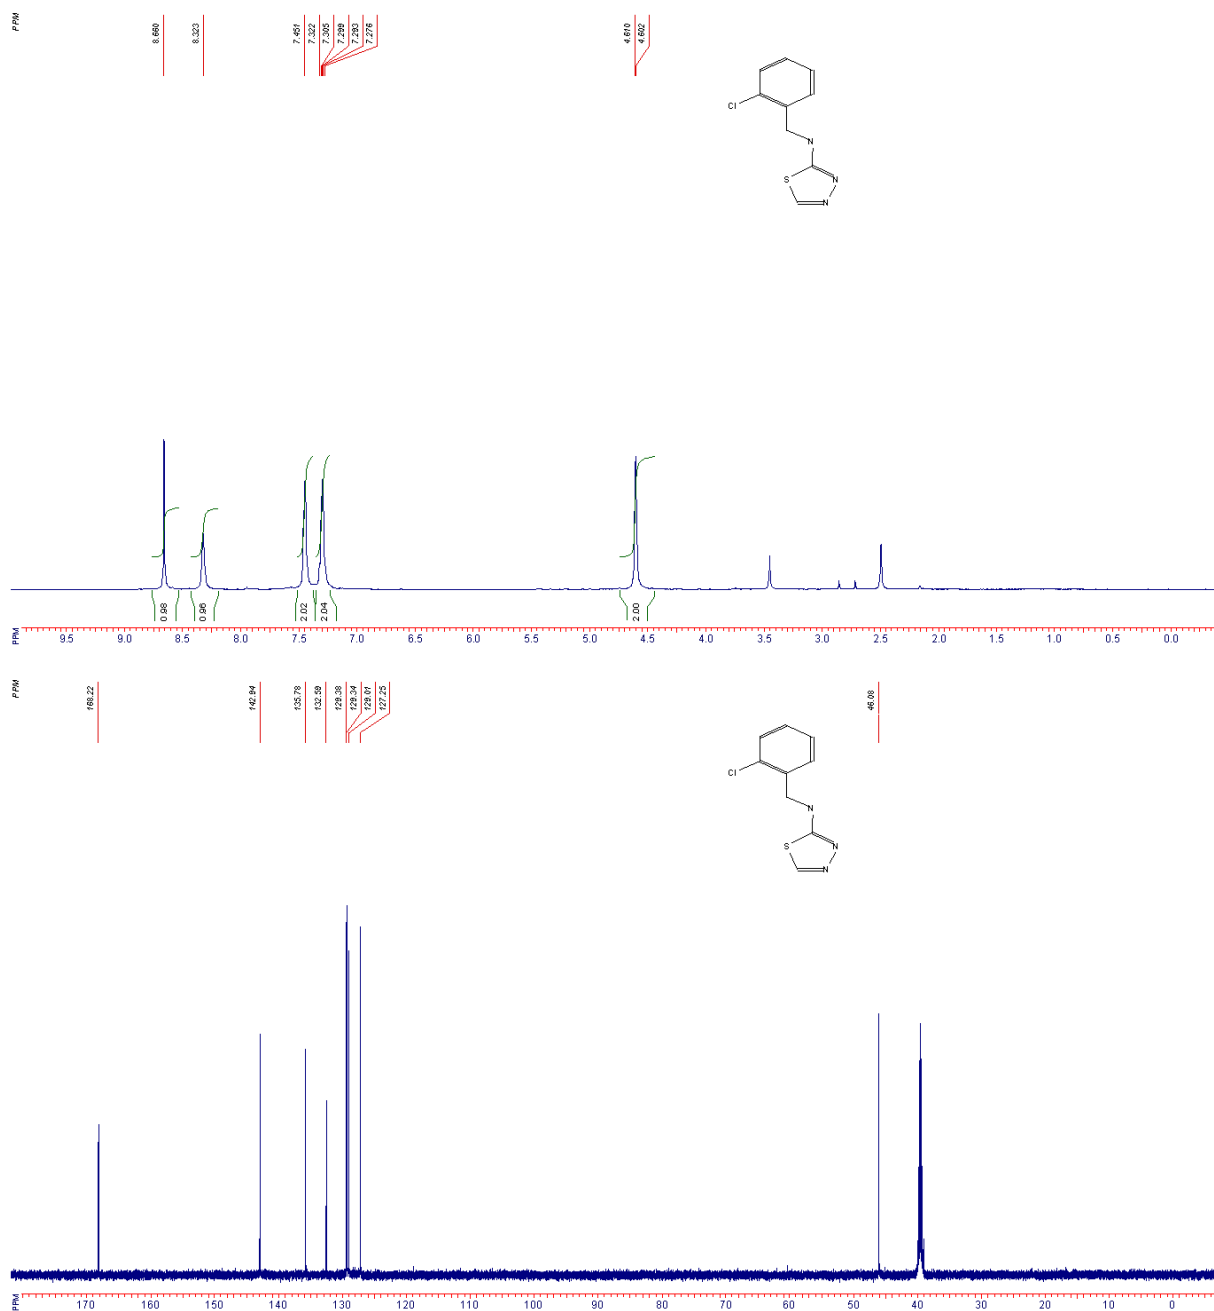

Entry 17, in Table 1

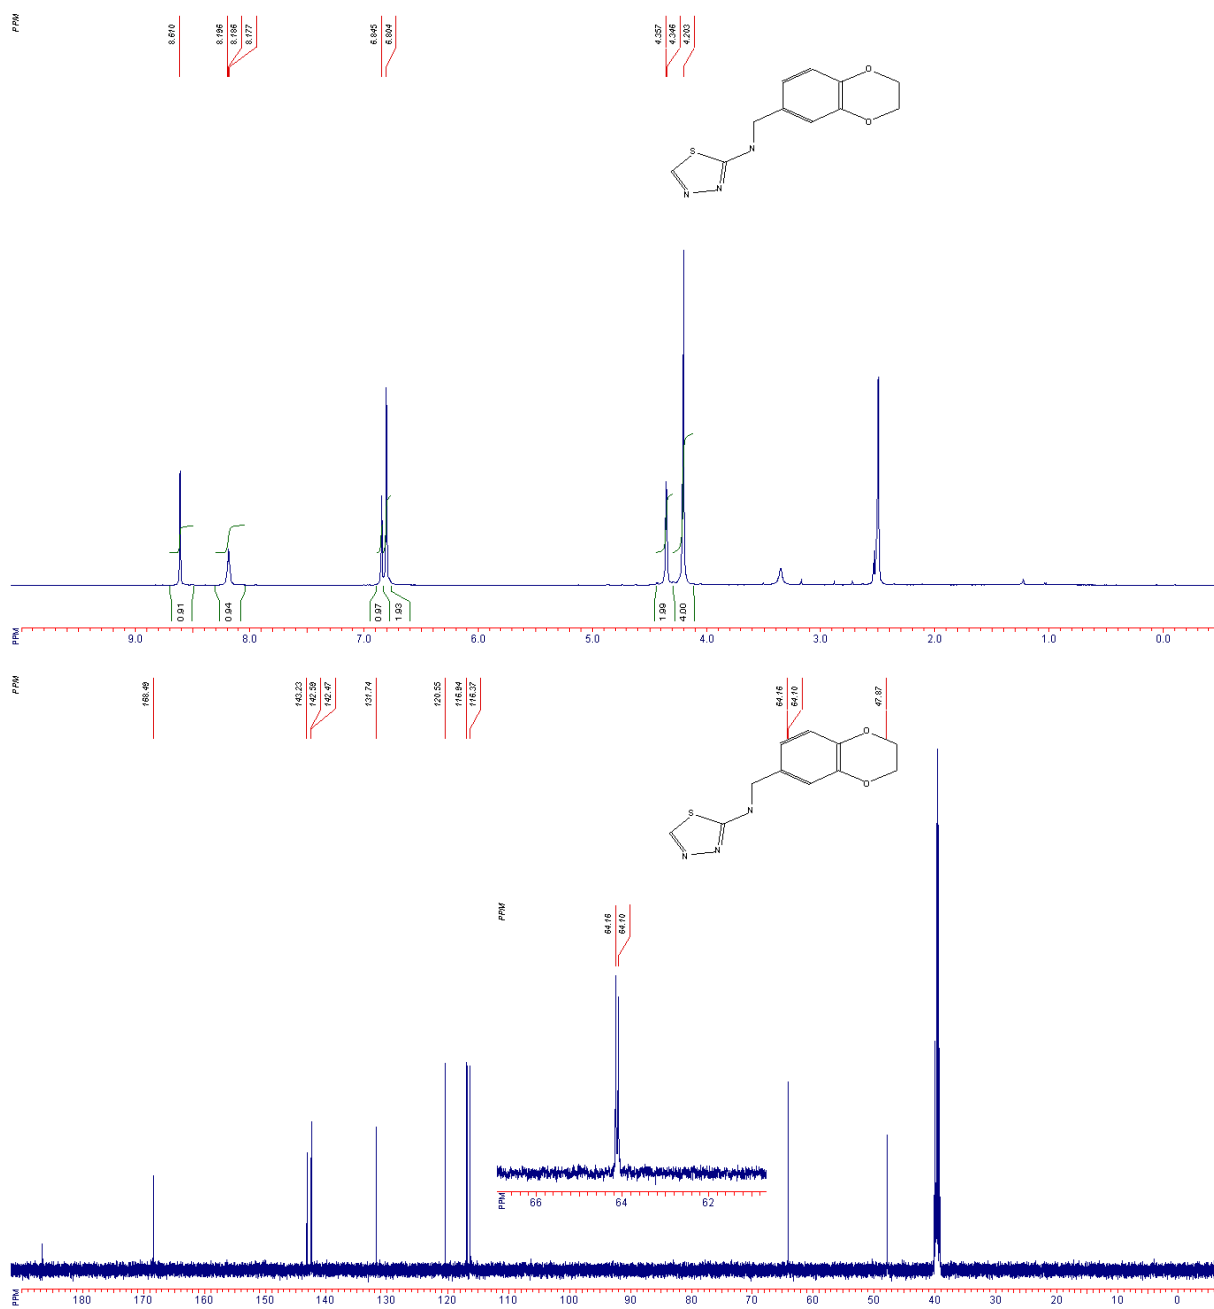

Entry 18, in Table 1



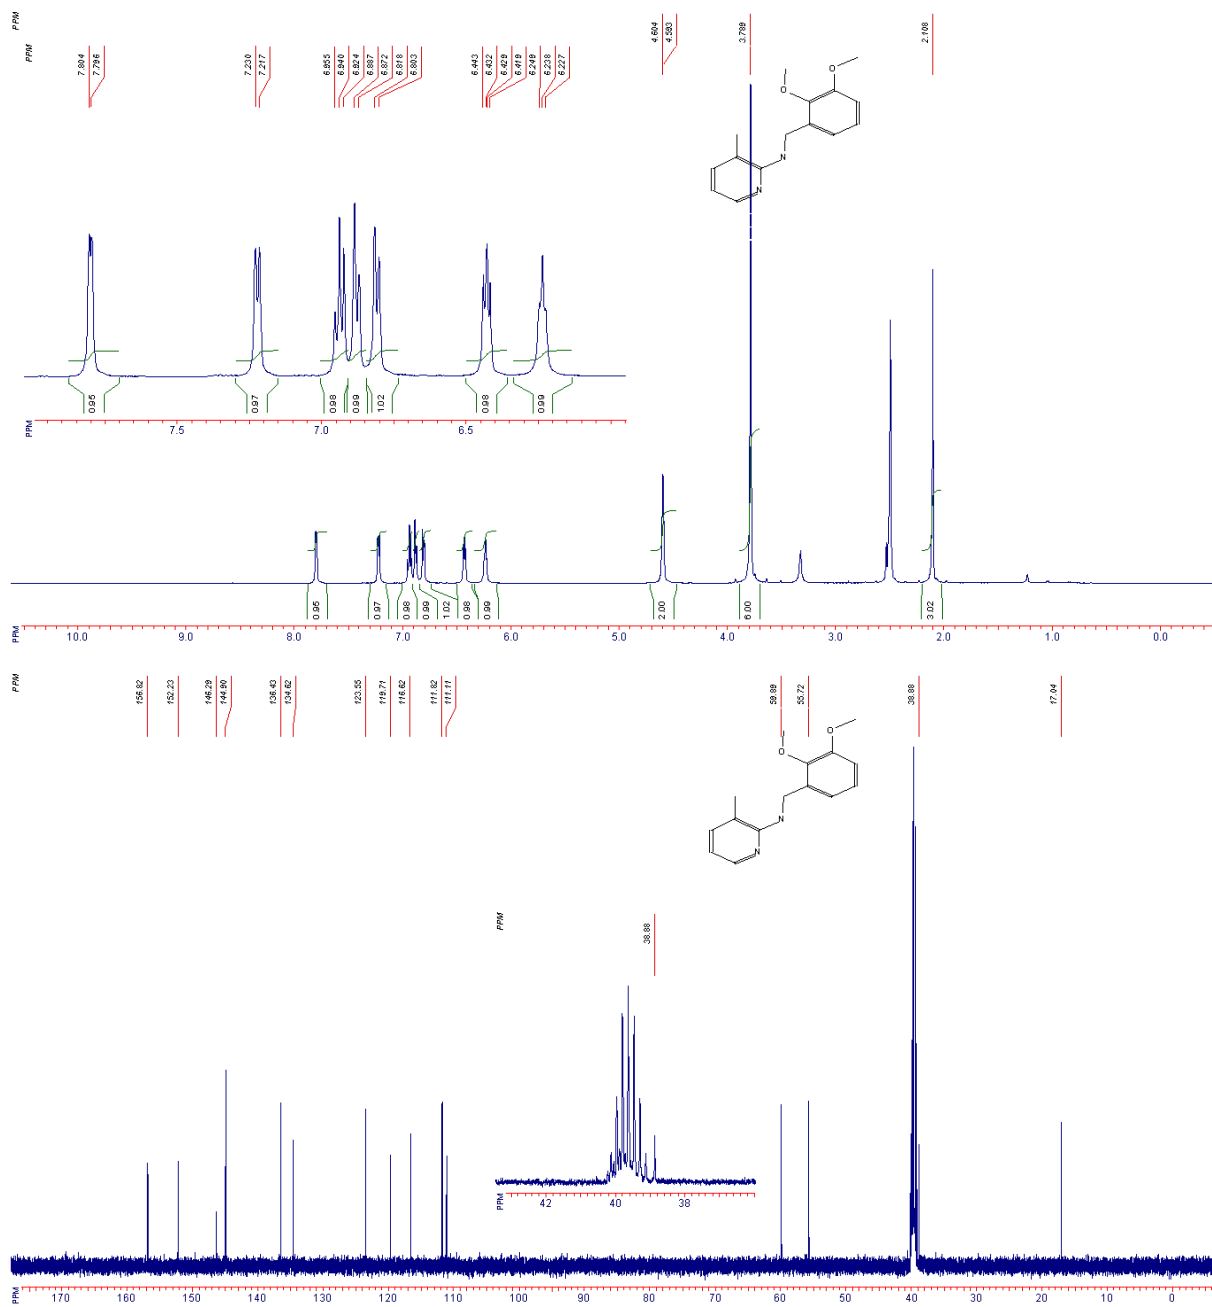

Entry 19, in Table 1

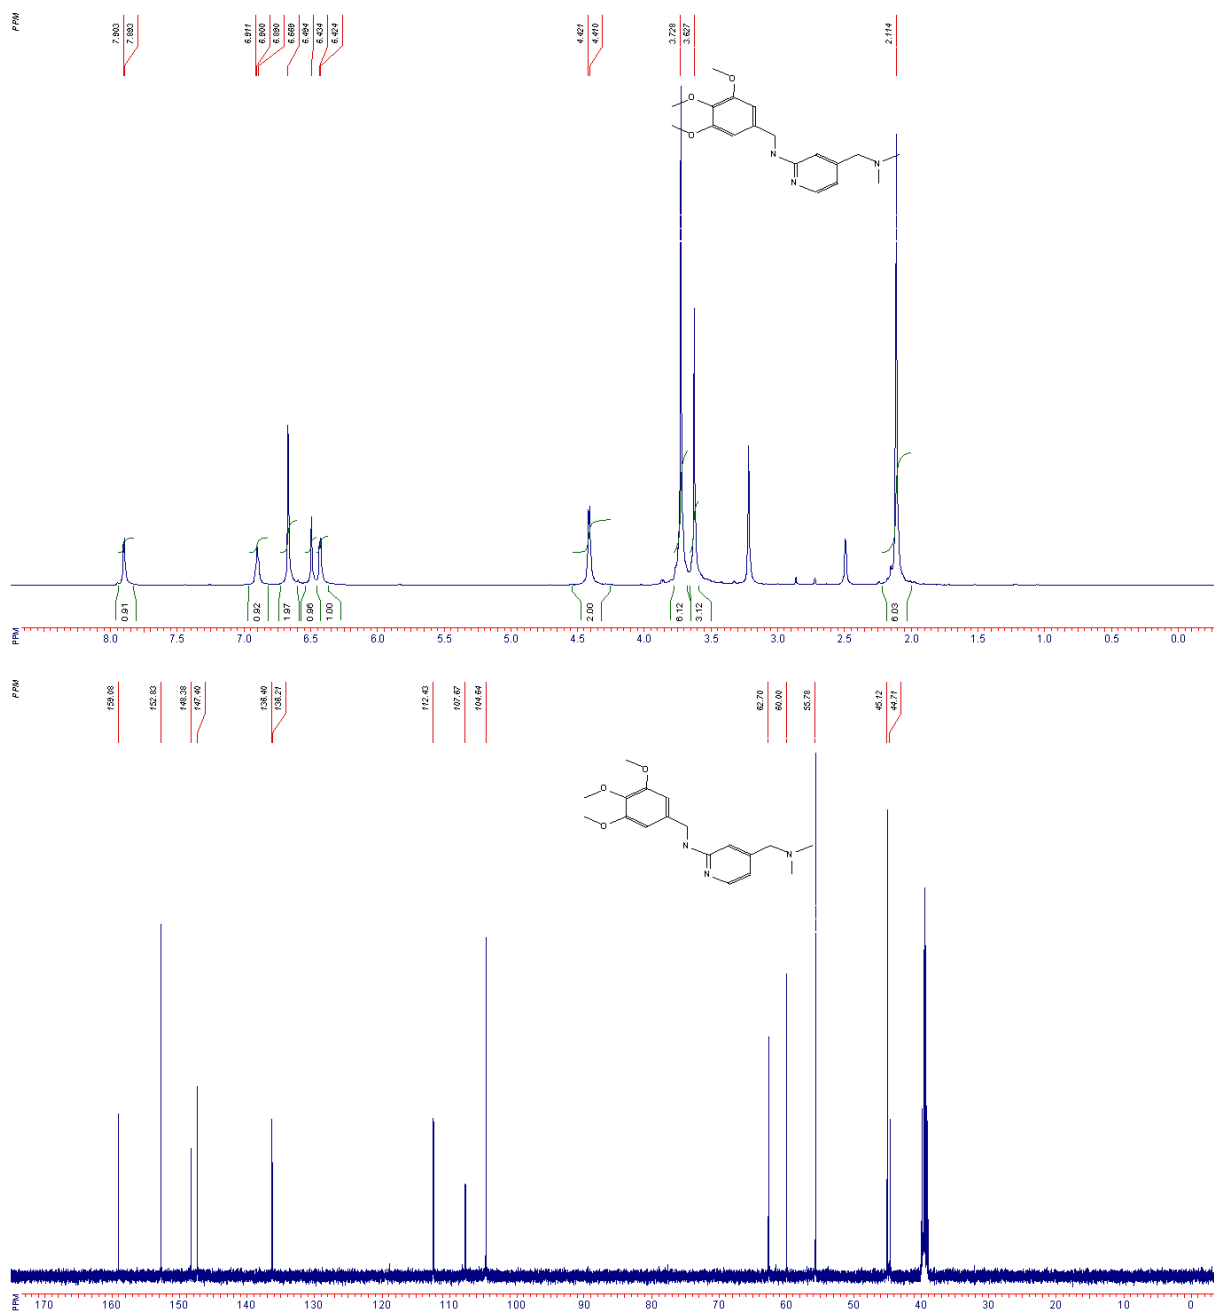

Entry 22, in Table 1

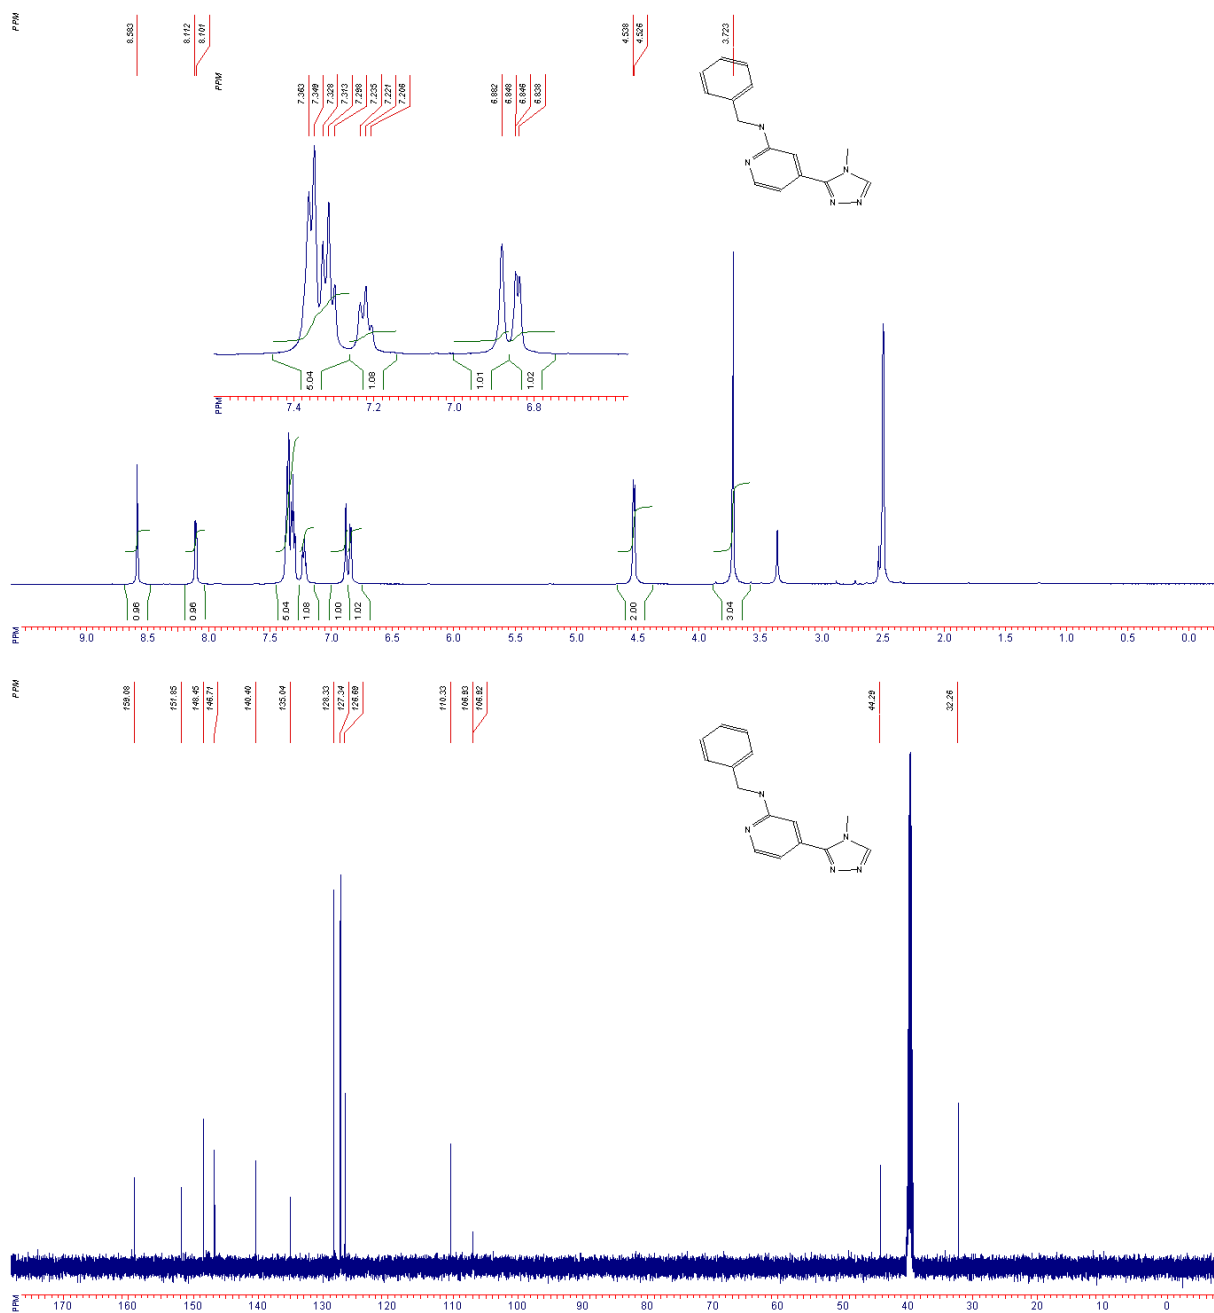

Entry 23, in Table 1

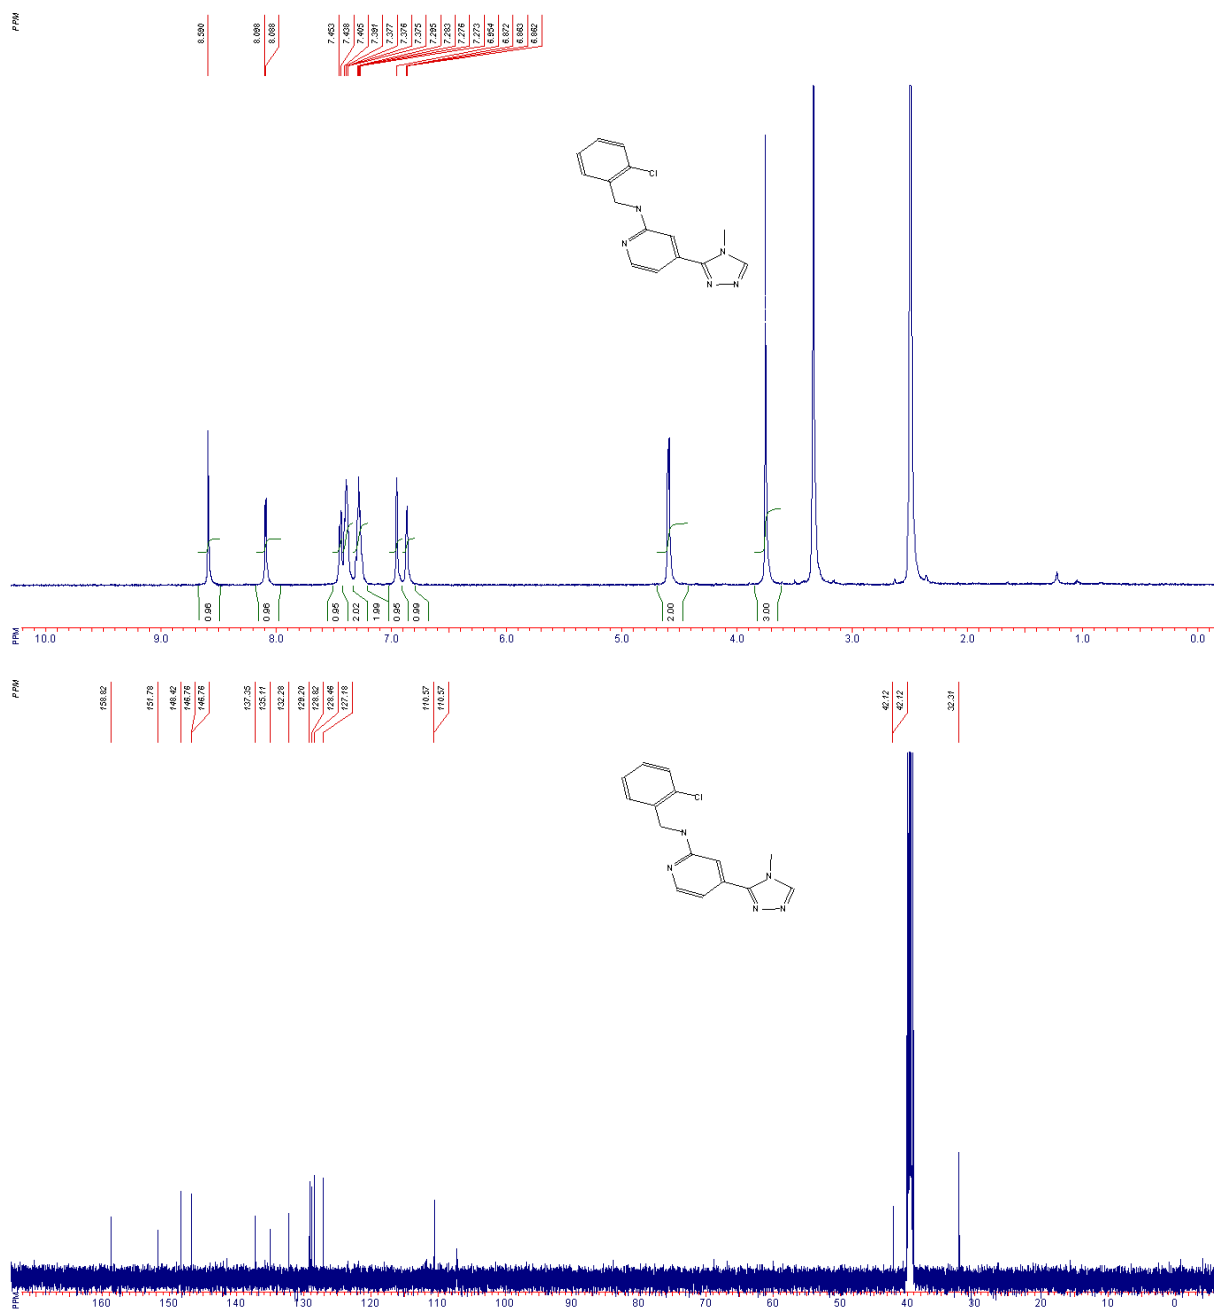

Entry 24, in Table 1

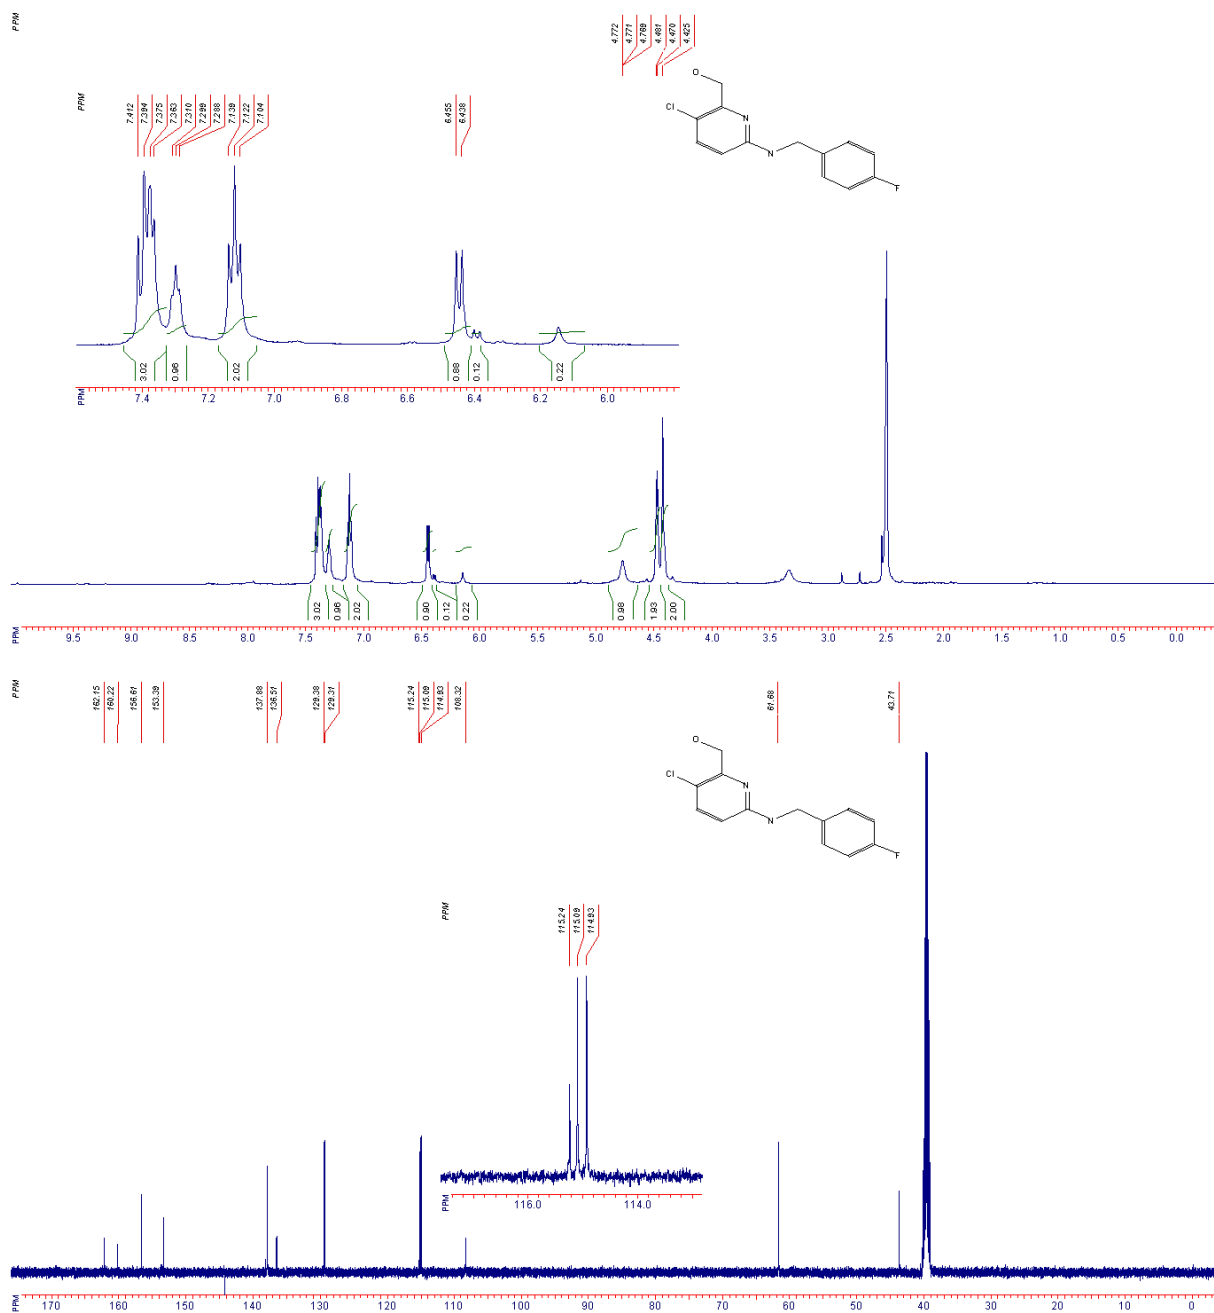

Entry 27, in Table 1

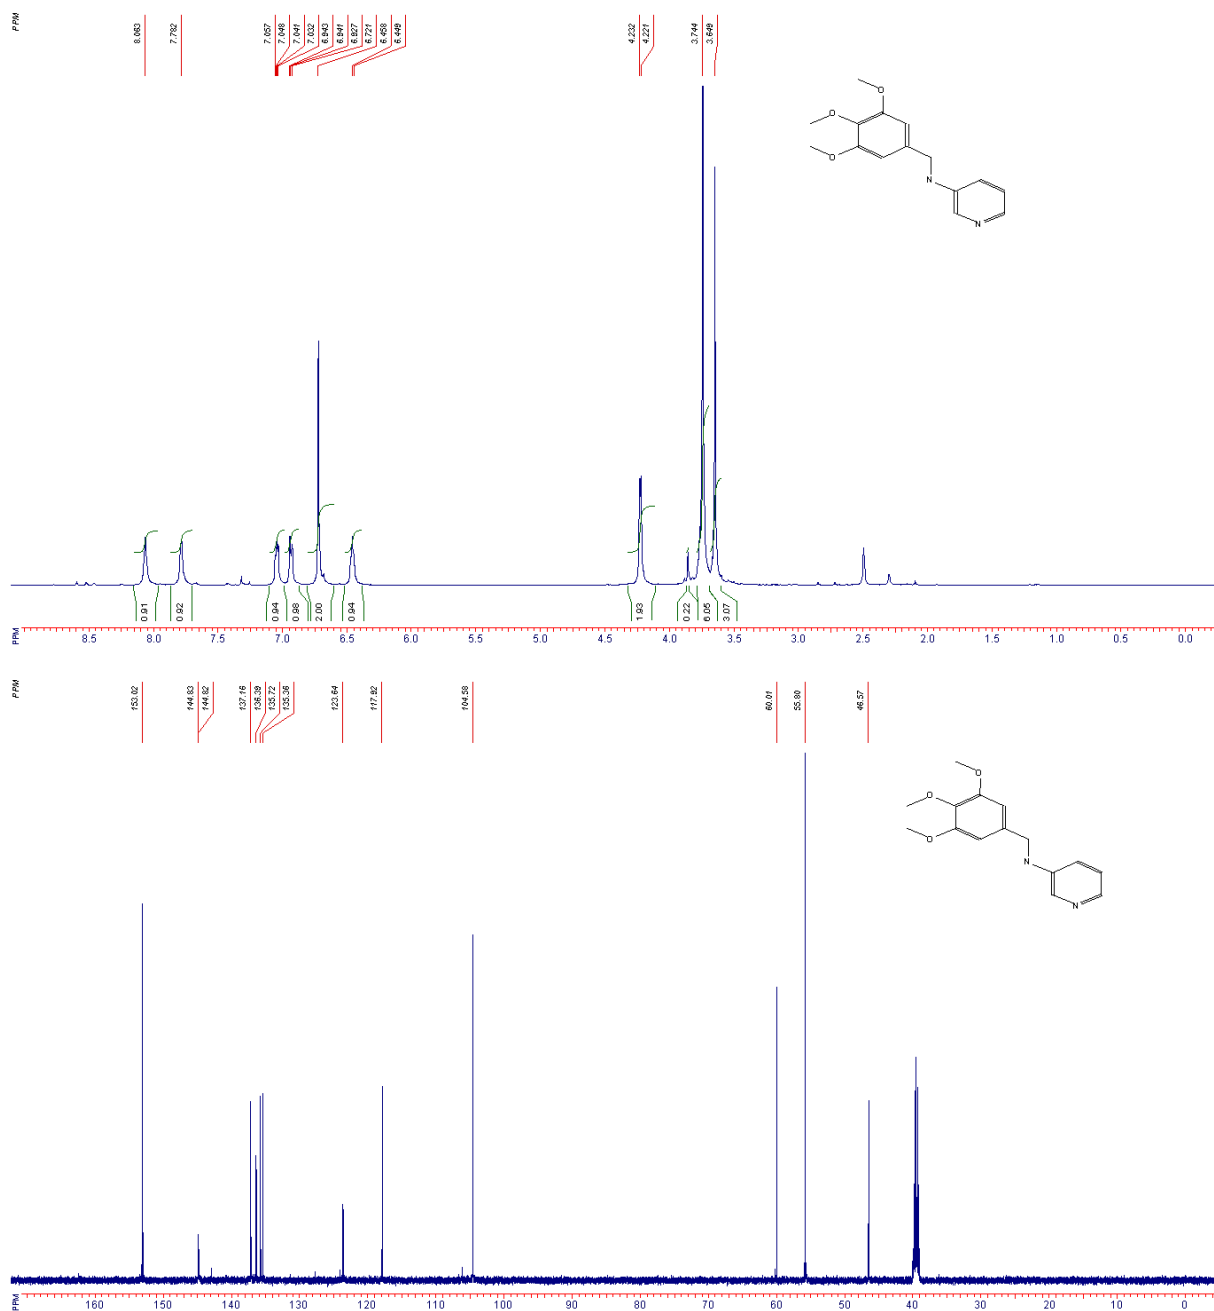

Entry 30, in Table 1



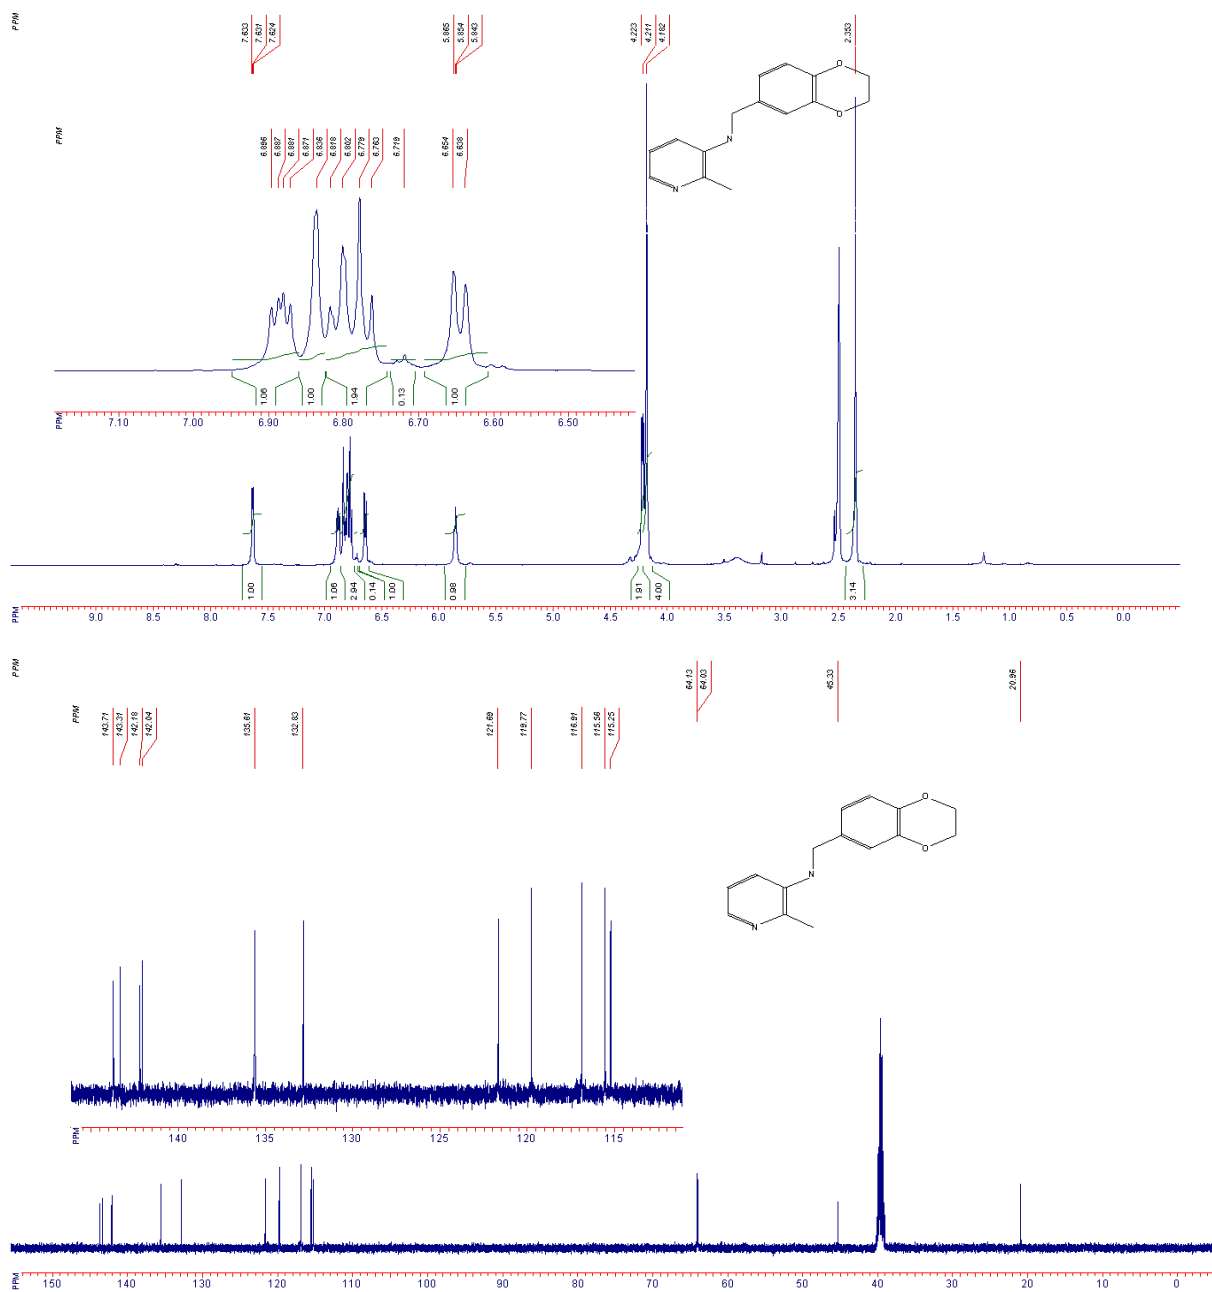

Entry 31, in Table 1

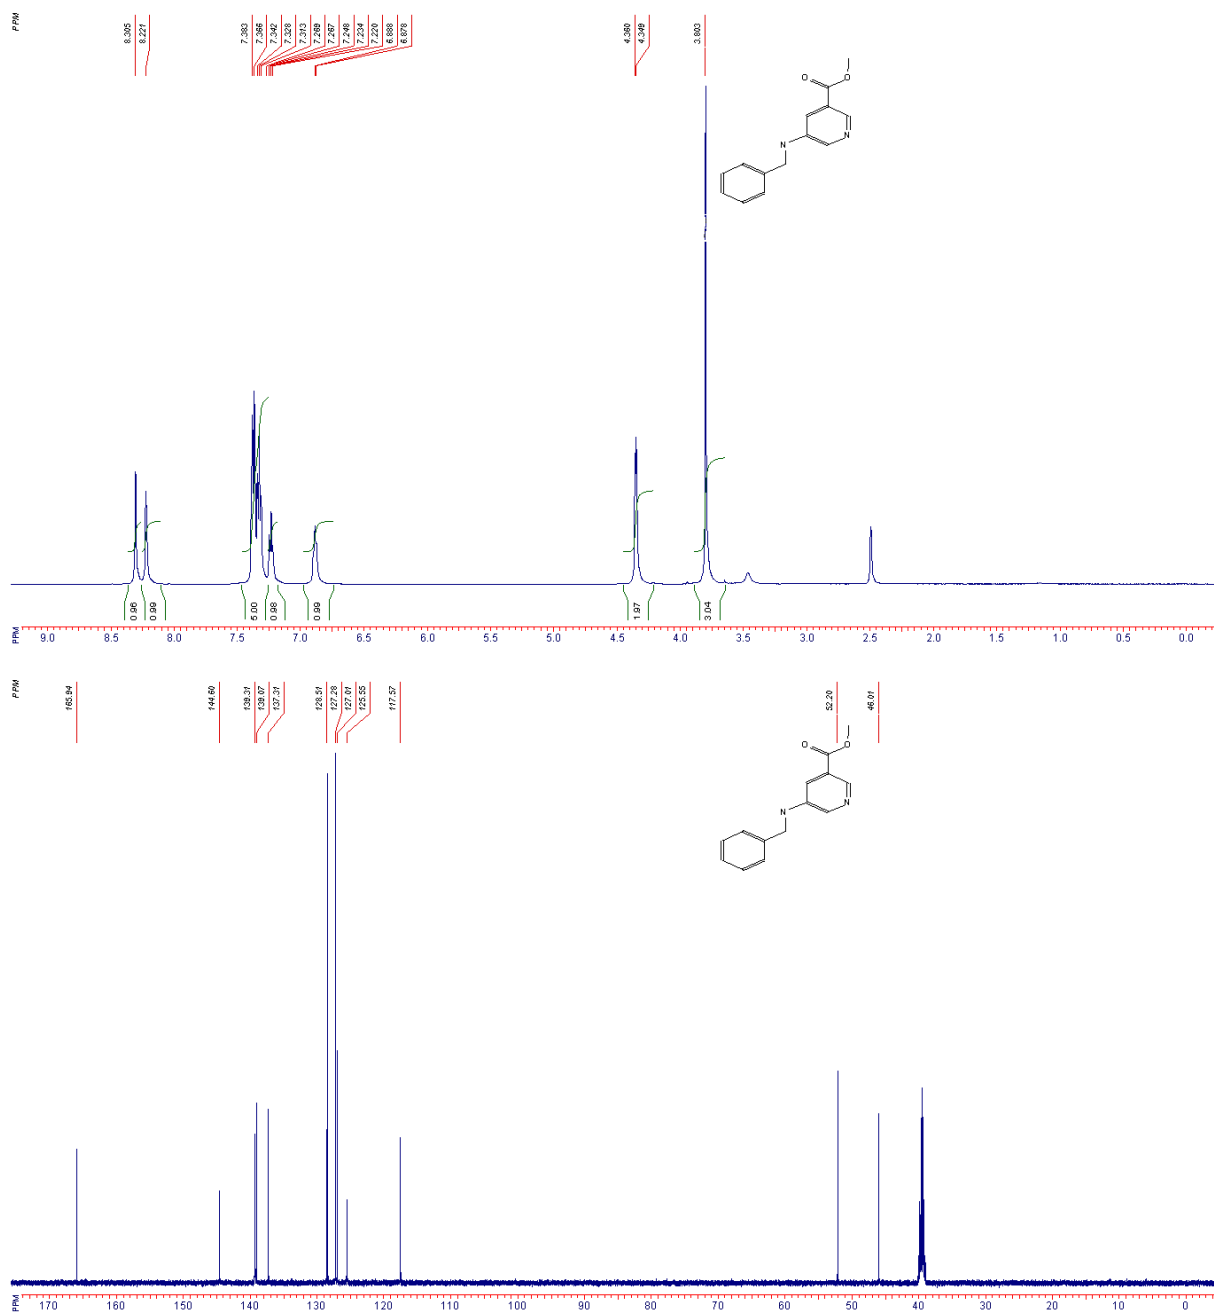

Entry 33, in Table 1

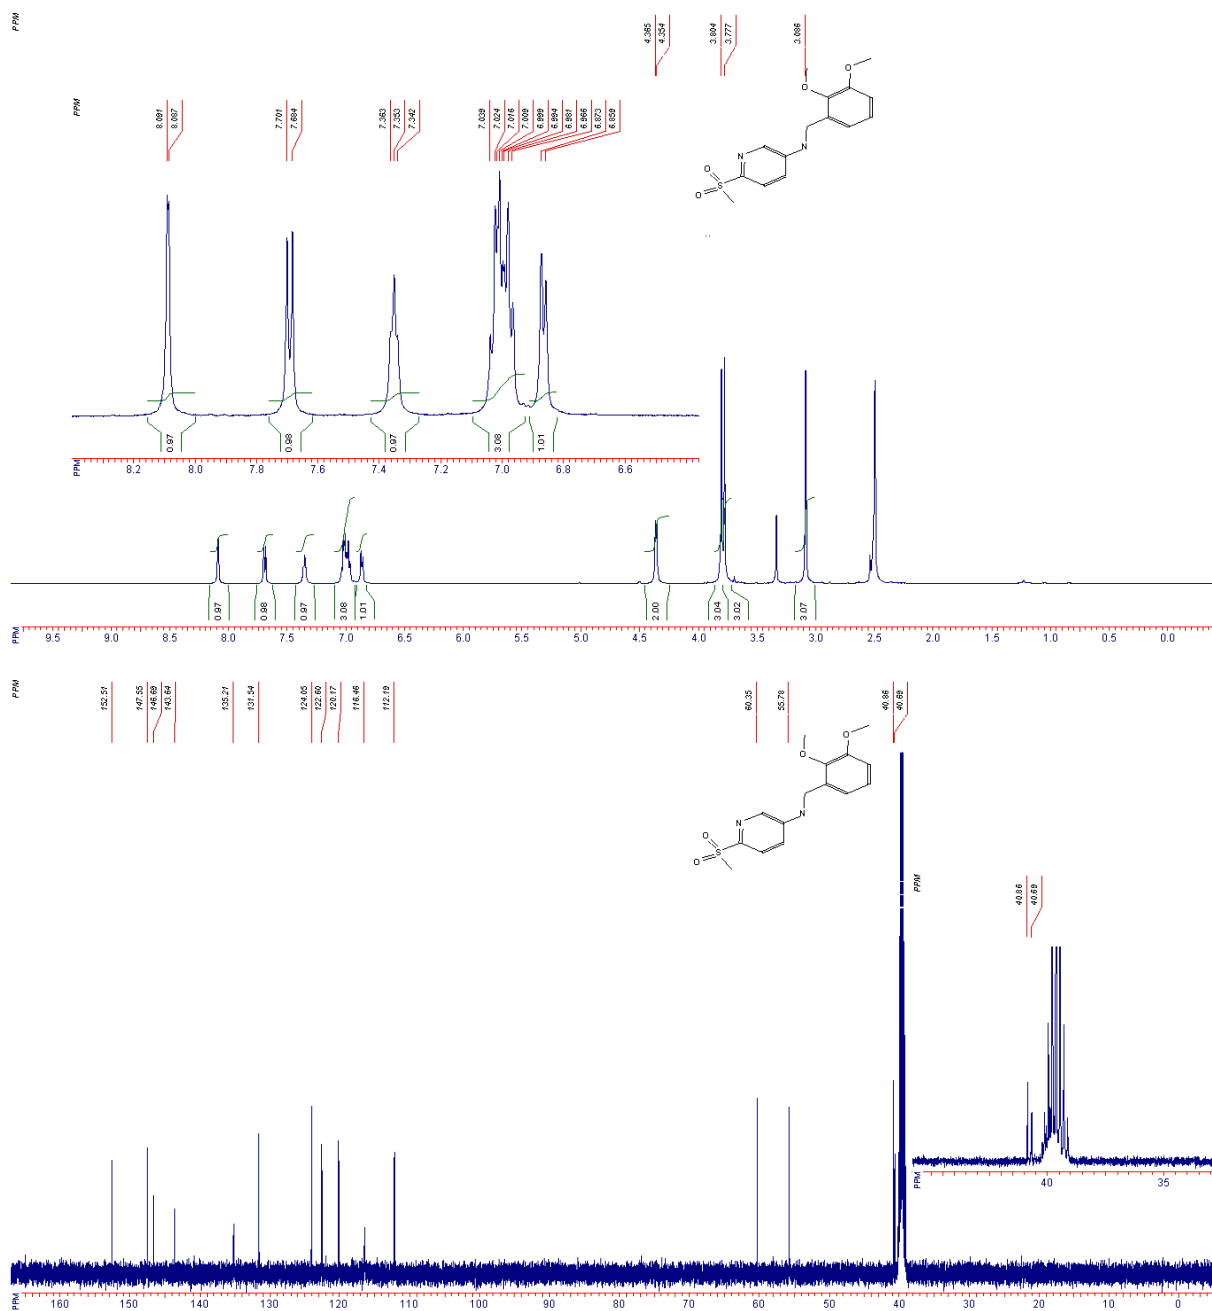

Entry 36, in Table 1

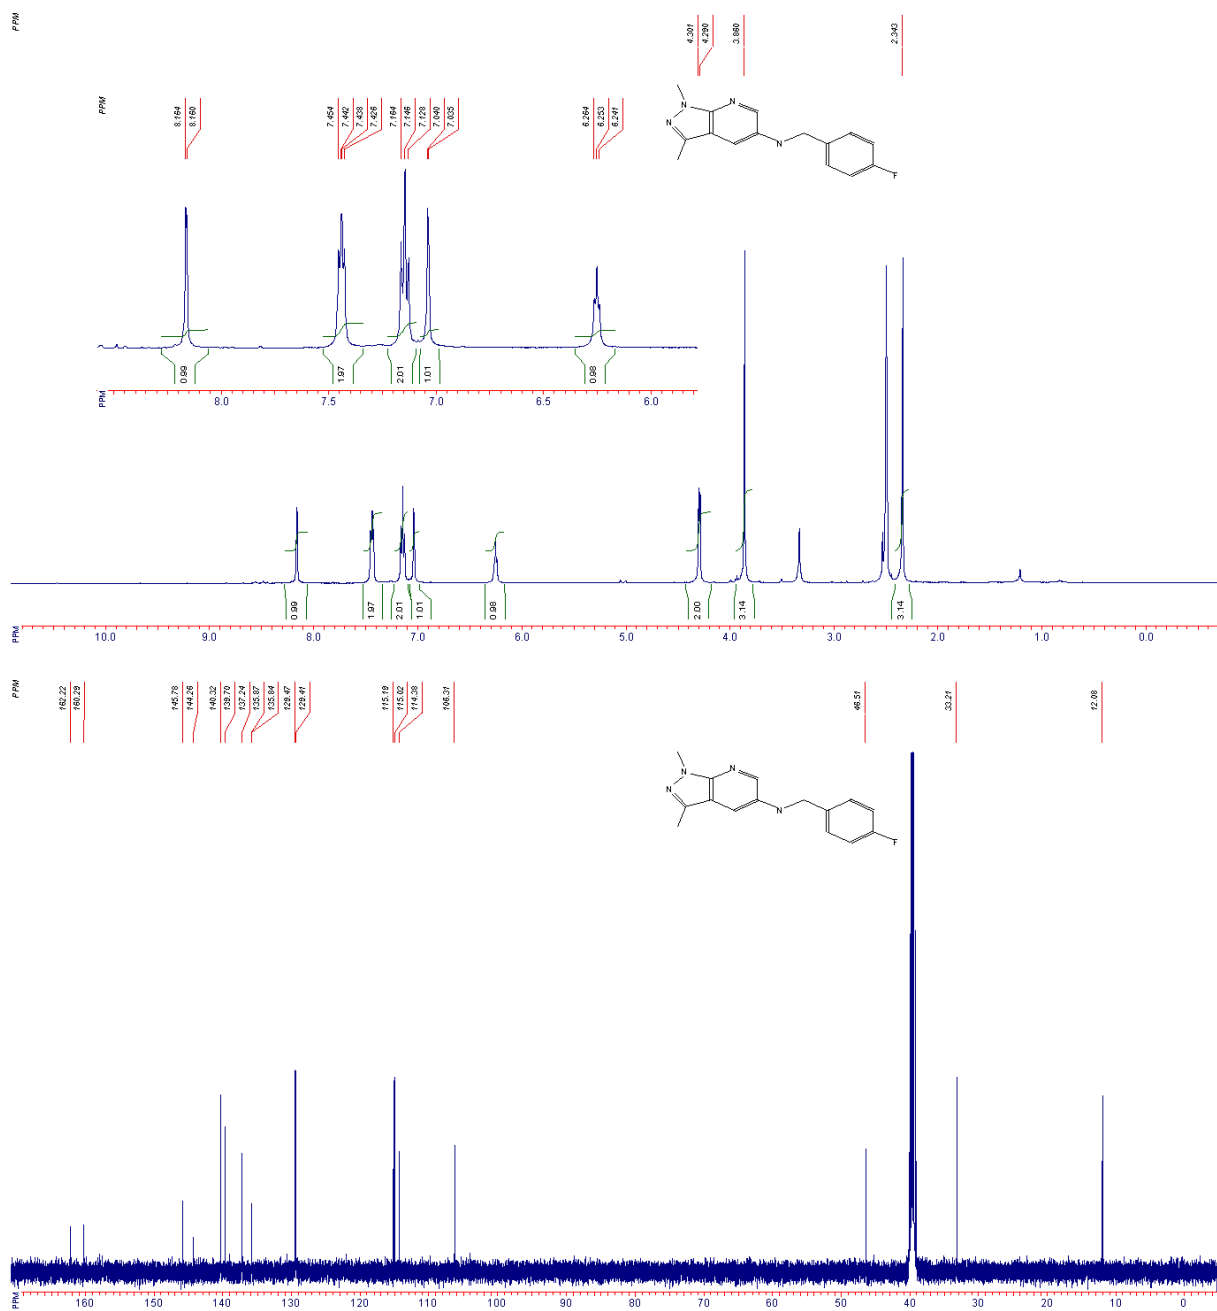

Entry 40, in Table 1
